# Supplementary material for: Metabarcoding Is Powerful yet Still Blind: A Comparative Analysis of Morphological and Molecular Surveys of Seagrass Communities
Source: PubMed Central journal article supplement (PMC4323199; doi:10.1371/journal.pone.0117562), 2015-02-10

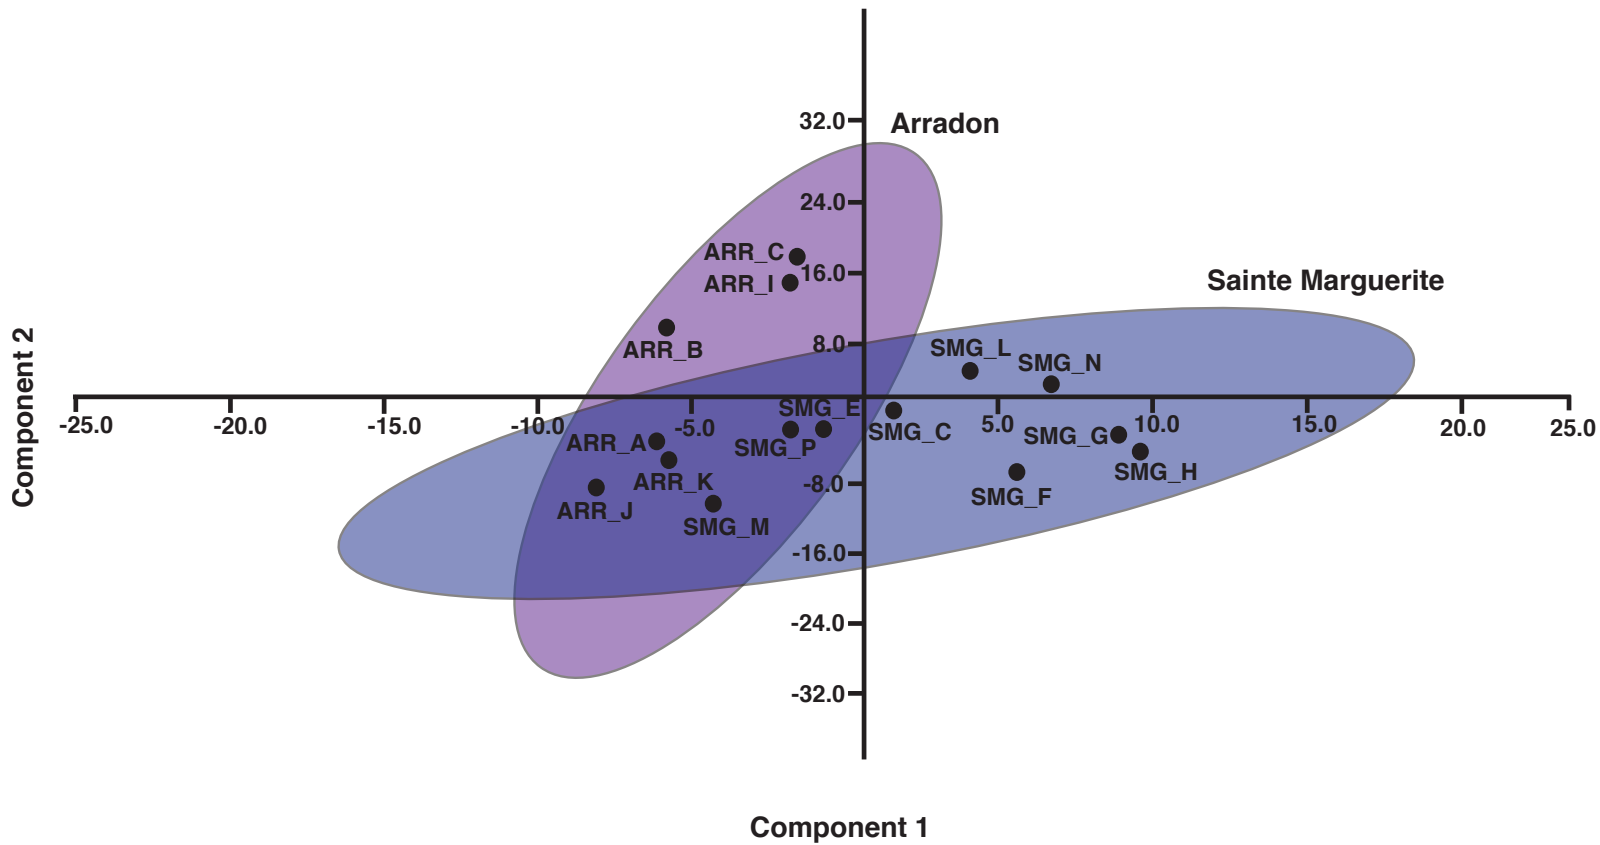

Supplement: pone.0117562.s009.pdf [file pone.0117562.s009.pdf]
