# Supplementary material for: Metabarcoding Is Powerful yet Still Blind: A Comparative Analysis of Morphological and Molecular Surveys of Seagrass Communities
Source: PLoS One. 2015 Feb 10;10(2):e0117562. doi: 10.1371/journal.pone.0117562 (PMC4323199; doi:10.1371/journal.pone.0117562)
Supplement: S1 Dataset — Each meadow contains collections from three cores, and presence of species is indicated by “1”, while absence is indicated by “0”. The most common species found in this inventory are highlighted in yellow, while those common species not found in the inventory are highlighted in light green. Columns for those species uncovered by each gene are highlighted in dark green for 18S and dark blue for COI. (XLSX) [file pone.0117562.s001.xlsx]

## Sheet: S1 Dataset
S1 Dataset			0 = absent, 1 = present	50 most common species	common species not found in this inventory
			Arradon	Arradon	Arradon	Ile Callot	Ile Callot	Ile Callot	L'Arcouest	L'Arcouest	L'Arcouest	Roscanvel	Roscanvel	Roscanvel	Sainte Marguerite	Sainte Marguerite	Sainte Marguerite	Saint Malo	Saint Malo	Saint Malo
Species	18S species found in dataset	COI species found in dataset	Core 1	Core 2	Core 3	Core 1	Core 2	Core 3	Core 1	Core 2	Core 3	Core 1	Core 2	Core 3	Core 1	Core 2	Core 3	Core 1	Core 2	Core 3
Arthropoda,Abludomelita gladiosa			1	1	1	1	0	0	0	0	0	0	0	1	0	0	0	0	1	1
Arthropoda,Abludomelita obtusata			0	0	0	0	0	0	0	0	0	0	0	0	0	0	0	0	0	0
Mollusca,Abra alba			1	1	1	1	1	0	1	1	0	1	1	1	1	1	1	1	1	1
Mollusca,Acanthochitona crinita			0	0	0	0	0	0	0	0	0	0	0	0	0	0	0	0	0	0
Arthropoda,Achelia echinata			1	0	1	0	0	0	0	0	0	0	0	1	0	0	0	0	0	0
Cnidaria,Actinaria spp.			0	1	1	0	0	0	0	0	1	0	0	0	0	0	0	0	1	0
Cnidaria,Actinia equina			0	0	0	0	0	0	0	0	0	0	0	0	0	0	0	0	0	0
Mollusca,Aequipecten opercularis			0	0	0	0	0	0	0	0	0	0	0	0	0	0	0	0	0	0
Mollusca,Alvania beanii			0	0	0	0	0	0	0	0	0	0	0	0	0	0	0	0	0	0
Mollusca,Alvania semistriata			0	0	0	0	0	0	0	0	0	0	0	0	0	0	0	0	0	0
Arthropoda,Ampelisca brevicornis			0	0	0	0	0	0	0	0	0	0	0	0	0	0	0	0	1	0
Arthropoda,Ampelisca typica			0	0	0	0	0	0	0	0	0	0	0	0	0	0	0	0	0	0
Arthropoda,Amphilochus neapolitanus			0	0	0	0	0	1	0	0	0	0	0	0	0	0	0	0	0	0
Arthropoda,Amphilochus spencebatei			0	0	0	0	0	0	0	0	0	0	0	0	1	0	0	0	0	0
Echinodermata,Amphipholis squamata			1	0	1	0	0	0	0	0	0	1	0	0	1	1	1	0	0	0
Arthropoda,Ampithoe gammaroides			0	0	0	0	0	0	0	0	0	0	0	0	1	0	1	0	0	0
Arthropoda,Ampithoe helleri			0	0	0	0	0	0	0	0	0	0	0	0	1	1	1	0	0	0
Arthropoda,Ampithoe ramondi			0	0	0	0	0	0	0	0	0	0	0	0	0	1	0	0	0	0
Arthropoda,Ampithoe rubricata			1	1	1	1	1	1	0	0	1	1	1	0	1	0	0	0	0	0
Arthropoda,Anapagurus hyndmanni			0	0	0	1	1	1	0	0	0	0	1	1	0	0	0	0	0	0
Cnidaria,Anemonia viridis			0	0	1	0	0	0	1	1	0	0	0	0	0	0	0	0	1	0
Arthropoda,Anilocra sp.			0	0	0	0	0	0	0	0	0	0	0	0	0	0	0	0	0	0
Mollusca,Anomia ephippium			0	0	0	0	0	0	0	0	0	0	0	0	0	0	0	0	0	0
Cnidaria,Anthozoa sp.			0	0	0	0	0	0	0	0	0	0	0	0	0	0	0	0	1	0
Annelida,Aonides oxycephala			1	1	1	1	1	1	0	1	1	1	1	1	0	0	0	0	0	0
Arthropoda,Aora gracilis			1	1	1	0	1	0	0	1	1	1	0	1	1	1	1	1	1	1
Arthropoda,Apherusa bispinosa			0	0	0	1	1	1	1	0	0	0	0	0	0	1	1	0	0	0
Arthropoda,Apherusa cirrus			0	0	0	0	0	0	0	0	0	0	0	0	0	0	0	0	0	0
Arthropoda,Apherusa jurinei			0	0	0	0	0	0	0	0	0	0	0	0	0	0	0	0	0	0
Arthropoda,Apherusa ovalipes			0	0	0	1	0	1	0	0	0	0	0	0	0	0	1	0	0	0
Chordata,Apletodon dentatus			0	0	0	0	0	0	0	0	0	0	0	0	0	0	0	0	0	0
Mollusca,Aplysia punctata			0	0	0	0	0	0	0	0	0	0	0	0	0	1	0	0	0	0
Annelida,Aponuphis bilineata			0	0	0	0	0	0	0	1	0	0	0	0	0	0	0	1	1	1
Arthropoda,Apseudes latreillii			1	1	1	1	1	1	1	1	1	1	1	0	1	1	1	0	0	0
Arthropoda,Apseudes talpa			1	1	1	1	1	0	0	0	1	1	1	0	1	1	0	0	0	0
Annelida,Arenicola marina			0	0	0	0	0	0	0	0	0	0	0	0	0	0	0	0	0	0
Chordata,Ascidia sp.			0	0	0	0	0	0	0	0	0	0	0	0	0	0	0	0	0	0
Chordata,Ascidiella aspersa			0	0	0	0	0	0	0	0	0	0	0	0	0	0	0	0	0	0
Chordata,Ascidiella sp.			1	1	1	0	0	0	0	0	0	0	0	0	0	0	0	0	0	0
Arthropoda,Astacilla longicornis			0	0	0	0	0	0	0	0	0	0	0	0	0	0	0	0	0	0
Echinodermata,Asterias rubens			0	0	0	0	0	0	0	0	0	0	0	0	0	0	0	0	0	0
Echinodermata,Asterina gibbosa			1	0	0	0	0	0	0	0	0	0	0	0	0	0	0	0	0	0
Arthropoda,Athanas nitescens			0	0	0	0	0	0	0	0	0	1	1	1	0	0	0	0	0	0
Arthropoda,Atylus guttatus			0	0	0	1	1	1	1	0	0	0	0	0	1	1	0	0	0	0
Arthropoda,Atylus swammerdami			0	0	0	0	0	0	0	0	0	0	0	0	1	1	1	0	0	1
Cnidaria,Aureliana heterocera			0	0	0	0	0	0	0	0	1	0	0	0	0	0	0	0	0	0
Mollusca,Barleeia unifasciata			0	0	0	0	0	0	0	0	0	0	0	0	0	0	0	0	0	0
Arthropoda,Bathyporeia pelagica			0	0	0	0	0	0	0	0	0	0	0	0	0	0	0	0	0	0
Mollusca,Bela nebula			0	0	0	0	0	0	0	0	0	0	0	0	0	0	0	0	0	0
Mollusca,Bittium reticulatum			1	1	1	0	0	0	0	0	0	1	1	1	0	0	0	0	0	0
Arthropoda,Bodotria scorpioides			0	0	0	0	0	0	0	0	0	0	0	0	0	0	1	0	0	0
Chordata,Callionymus lyra			0	0	0	0	0	0	0	0	0	0	0	0	0	0	0	0	0	0
Mollusca,Calliostoma zizyphinum			0	0	0	0	0	0	0	0	0	0	0	0	0	0	0	0	0	0
Mollusca,Callista chione			0	0	0	0	0	0	0	0	0	0	0	0	0	0	0	0	0	0
Mollusca,Callochiton septemvalvis			0	0	0	0	0	0	0	0	0	1	0	0	0	0	0	0	0	0
Mollusca,Calyptraea chinensis			1	0	1	1	1	1	0	0	1	1	1	1	0	0	0	0	0	0
Annelida,Capitella capitata			0	1	0	0	0	0	1	0	1	0	0	0	0	0	1	1	0	1
Arthropoda,Caprella acanthifera			1	1	1	1	1	0	1	1	1	0	0	0	0	0	0	1	1	1
Arthropoda,Carcinus maenas			1	0	0	0	0	0	0	0	0	0	0	0	0	0	0	0	0	0
Annelida,Caulleriella alata			0	0	0	1	1	1	0	1	1	0	0	0	0	0	0	0	1	1
Annelida,Caulleriella bioculata			0	0	0	0	1	0	0	0	0	0	0	0	0	0	0	0	0	0
Arthropoda,Ceradocus semiserratus			0	0	0	0	0	0	0	0	0	1	1	1	0	0	0	0	0	0
Mollusca,Cerastoderma edule			0	0	0	0	0	0	0	0	1	0	0	0	0	0	0	0	0	0
Mollusca,Cerithiopsis tubercularis			0	0	0	0	0	0	0	0	0	0	0	0	0	0	0	0	0	0
Annelida,Chaetozone sp.			0	0	0	0	0	1	0	0	0	0	0	0	0	0	0	1	1	1
Mollusca,Chamelea gallina			0	0	0	0	0	0	0	0	0	0	0	0	0	0	0	0	0	0
Mollusca,Chauvetia brunnea			0	0	0	0	0	0	0	0	0	0	0	0	0	0	0	0	0	0
Mollusca,Chlamys varia			0	0	0	0	0	0	0	0	0	0	0	0	0	0	0	0	0	0
Chordata,Ciliata mustela			0	0	0	0	0	0	0	0	0	0	0	0	0	0	0	0	0	0
Annelida,Cirratulus cirratus			0	0	0	0	0	0	0	0	0	0	0	0	0	0	0	0	0	0
Annelida,Cirriformia tentaculata			0	0	0	1	1	1	0	0	0	1	1	1	0	0	0	0	0	0
Annelida,Clymenura clypeata			1	1	1	0	1	0	0	0	0	0	0	0	0	0	1	1	0	0
Arthropoda,Corophium sextonae			1	1	1	0	0	0	0	0	0	0	0	0	0	0	0	0	0	0
Arthropoda,Corophium sp.			0	0	0	0	0	0	0	0	0	0	0	0	0	0	0	0	0	0
Arthropoda,Crangon crangon			0	0	0	0	0	0	0	0	0	0	0	0	0	0	0	0	0	0
Mollusca,Crepidula fornicata			0	0	0	0	0	0	0	0	0	0	0	0	0	0	0	0	0	0
Arthropoda,Cumopsis goodsir			0	0	0	0	0	0	0	0	0	0	0	0	0	0	0	0	0	0
Arthropoda,Cymodoce truncata			0	0	0	0	0	0	0	0	0	1	1	1	0	0	0	0	0	0
Arthropoda,Dexamine spinosa			0	0	1	1	1	0	0	1	1	0	1	0	0	0	0	1	1	1
Mollusca,Diodora graeca			0	0	0	0	0	0	0	0	0	0	1	0	0	0	0	0	0	0
Mollusca,Dosinia exoleta			0	0	0	0	0	0	0	0	0	0	0	0	0	0	0	0	0	0
Arthropoda,Dynamene bidentata			0	0	0	0	0	0	0	0	0	0	1	0	0	0	0	0	0	0
Arthropoda,Ebalia tuberosa			0	0	0	0	0	0	0	0	0	0	0	0	0	0	0	0	0	0
Cnidaria,Edwardsia claparedii			0	0	0	1	0	1	0	0	0	0	0	0	0	0	0	0	0	0
Arthropoda,Endeis spinosa			0	0	0	0	0	0	0	0	0	0	0	0	0	0	0	0	0	0
Mollusca,Ensis ensis			0	0	0	0	0	0	1	0	1	0	0	0	0	0	0	0	0	0
Chordata,Entelurus aequoreus			0	0	0	0	0	0	0	0	0	0	0	0	0	0	0	0	0	0
Mollusca,Epitonium clathratulum			0	0	0	0	0	0	0	0	0	0	0	0	0	0	0	0	0	0
Arthropoda,Ericthonius punctatus			1	1	1	1	1	1	1	1	1	1	0	0	1	1	1	0	1	1
Annelida,Eteone longa			0	0	0	0	0	0	0	0	0	1	1	0	0	0	0	0	0	0
Annelida,Eteone picta			0	1	0	0	0	0	0	0	0	0	0	0	0	0	0	0	0	0
Annelida,Euclymene oerstedi			1	1	1	1	1	1	1	1	1	1	1	1	1	1	1	1	1	1
Annelida,Eulalia parva			0	0	0	0	1	0	0	0	0	0	0	0	0	0	0	0	0	0
Annelida,Eulalia viridis			0	0	0	0	0	0	0	0	0	0	0	1	0	0	0	0	0	0
Annelida,Eumida sanguinea			0	0	0	0	0	0	0	0	0	0	0	0	0	0	0	0	1	0
Annelida,Eumida sp.			0	0	0	0	0	1	0	0	0	0	0	0	0	0	0	0	0	0
Annelida,Eunice harassii			0	0	0	0	0	0	0	0	0	1	0	0	0	0	0	0	0	0
Annelida,Eunice vittata			0	0	0	0	0	0	0	0	0	0	1	1	0	0	0	0	0	0
Annelida,Eupolymnia nebulosa			0	0	0	1	0	0	0	0	0	0	0	0	0	0	0	0	0	0
Arthropoda,Eurynome spinosa			0	0	0	0	0	0	0	0	0	0	0	0	0	0	0	0	0	0
Arthropoda,Galathea intermedia			0	0	0	0	0	0	0	0	0	0	0	0	0	0	0	0	0	0
Arthropoda,Galathea squamifera			0	0	0	0	0	0	0	0	0	0	0	0	0	0	0	0	0	0
Arthropoda,Gammarella fucicola			1	1	1	1	1	1	1	1	1	1	1	1	0	0	0	0	0	0
Arthropoda,Gammaropsis maculata			0	0	0	0	0	0	0	0	0	0	0	0	0	0	0	0	0	0
Arthropoda,Gammarus locusta			1	1	1	0	1	1	0	0	0	0	0	0	0	0	0	1	0	0
Arthropoda,Gammarus salinus			0	0	0	0	0	0	0	0	0	0	0	0	0	0	0	0	0	0
Mollusca,Gibbula albida			0	0	0	0	0	0	0	0	0	0	0	0	0	0	0	0	0	0
Mollusca,Gibbula cineraria			1	0	1	1	0	0	0	0	0	1	1	1	0	0	1	0	0	0
Mollusca,Gibbula magus			0	0	0	0	0	0	0	0	0	0	0	0	0	0	0	1	0	0
Mollusca,Gibbula pennanti			0	0	0	0	0	0	0	1	0	0	0	0	0	0	0	0	0	1
Mollusca,Gibbula umbilicalis			0	0	0	0	0	0	0	0	0	0	1	1	0	0	0	0	0	0
Annelida,Glycera alba			0	0	0	0	0	0	0	0	0	1	1	1	0	0	0	0	0	0
Annelida,Glycera convoluta			0	0	0	0	0	0	1	1	0	0	0	0	0	0	0	0	0	0
Annelida,Glycera sp.			0	0	0	0	0	0	0	0	0	0	0	0	0	0	0	0	0	0
Chordata,Gobius niger			0	0	0	0	0	0	0	0	0	0	0	0	0	0	0	0	0	0
Chordata,Gobius sp.			0	0	0	0	0	0	0	0	0	0	0	0	0	0	0	0	0	0
Chordata,Gobiusculus flavescens			0	1	1	0	0	0	0	0	0	0	0	0	0	0	0	0	0	0
Sipuncula,Golfingia elongata			1	1	1	1	1	1	1	1	1	1	1	1	0	0	0	1	1	1
Sipuncula,Golfingia vulgaris			0	0	0	1	1	1	0	0	0	1	1	1	0	0	0	0	0	0
Porifera,Haliclona spp.			0	0	0	0	0	0	0	0	0	0	0	0	0	0	0	0	0	0
Cnidaria,Haliclystus auricula			0	0	0	0	0	0	0	0	0	0	0	0	0	0	0	0	0	0
Annelida,Harmothoe impar			0	0	0	0	0	0	0	0	0	1	1	1	0	0	0	0	0	0
Annelida,Harmothoe sp.			0	0	1	0	0	0	0	0	0	0	0	0	0	0	0	0	0	0
Annelida,Harmothoe spinifera			0	0	0	0	0	0	0	0	0	1	1	1	0	0	0	0	0	0
Mollusca,Helcion pellucidum			0	0	0	0	0	0	0	0	0	0	0	0	0	0	0	0	0	0
Annelida,Heteromastus filiformis			1	1	0	1	1	1	0	0	1	1	0	1	0	0	0	0	0	0
Mollusca,Hiatella rugosa			0	0	0	0	0	0	0	0	0	0	0	0	0	0	0	0	0	0
Arthropoda,Hippolyte inermis			0	0	0	0	0	0	0	0	0	0	0	0	0	0	0	0	0	0
Arthropoda,Hippolyte longirostris			0	0	0	0	0	0	0	0	0	0	0	0	0	0	0	0	0	0
Arthropoda,Hippolyte varians			0	0	1	0	0	0	0	0	0	1	1	1	0	0	0	0	0	0
Porifera,Hymeniacidon perlevis			0	0	0	0	0	0	0	0	0	0	0	0	0	0	0	0	0	0
Arthropoda,Idotea balthica			0	0	0	0	1	0	0	0	0	1	0	0	1	1	1	0	0	0
Arthropoda,Idotea emarginata			0	0	0	0	0	0	0	0	0	0	0	0	1	0	0	0	0	0
Arthropoda,Idotea linearis			0	0	0	0	0	0	0	0	0	0	0	0	1	1	0	0	0	0
Arthropoda,Idotea metallica			0	0	0	0	0	0	0	0	0	0	0	0	0	0	0	0	0	0
Arthropoda,Idotea pelagica			0	0	0	0	0	0	0	0	0	0	0	0	1	1	1	0	0	0
Arthropoda,Inachus phalangium			0	0	0	0	0	0	0	0	0	0	0	0	0	0	0	0	0	0
Arthropoda,Iphimedia obesa			0	0	0	0	0	0	0	0	0	0	0	0	0	0	0	0	0	0
Arthropoda,Iphinoe trispinosa			1	1	0	0	1	1	1	1	1	0	0	0	1	1	1	0	0	0
Arthropoda,Janira maculosa			0	0	0	0	0	0	0	0	0	1	1	1	0	0	0	0	0	0
Arthropoda,Jassa falcata			0	0	0	0	0	0	0	0	0	0	0	0	0	0	0	0	0	0
Arthropoda,Jassa marmorata			0	0	0	0	0	0	0	0	0	0	0	0	0	0	0	0	0	0
Arthropoda,Jassa pusilla			0	0	0	0	0	0	0	0	0	0	0	0	1	0	1	0	0	0
Mollusca,Jujubinus exasperatus			0	0	0	0	0	0	0	0	0	0	0	0	0	0	0	0	0	0
Mollusca,Jujubinus striatus			0	0	0	0	0	1	1	0	0	1	1	1	0	0	0	0	0	0
Chordata,Labrus bergylta			0	0	0	0	0	0	0	0	0	0	0	0	0	0	0	0	0	0
Mollusca,Lacuna parva			0	0	0	0	0	0	0	0	0	0	0	0	0	0	0	0	0	0
Mollusca,Lacuna vincta			0	0	0	0	0	0	0	0	0	0	0	0	0	0	0	0	0	0
Annelida,Lagis koreni			1	0	0	0	0	0	0	0	0	0	0	0	0	0	0	0	0	0
Annelida,Lanice conchilega			1	0	0	1	0	1	0	0	0	0	0	0	0	1	0	1	1	1
Arthropoda,Lembos websteri			0	0	0	1	0	0	0	0	0	0	0	0	0	0	0	0	0	0
Mollusca,Lepidochitona cinerea			0	0	0	0	0	1	0	0	0	0	0	0	0	0	0	0	0	0
Arthropoda,Leptocheirus pectinatus			0	0	0	0	0	0	0	0	0	0	0	0	0	0	0	0	0	0
Mollusca,Leptochiton cancellatus			0	0	0	0	1	1	0	0	0	0	0	0	0	0	0	0	0	0
Echinodermata,Leptosynapta inhaerens			0	0	0	0	0	0	0	0	1	0	0	0	0	0	0	0	0	0
Arthropoda,Leucothoe incisa			0	0	0	0	0	1	0	0	0	1	0	0	1	1	1	1	0	1
Arthropoda,Leucothoe richiardii			0	0	0	0	0	0	0	0	0	0	0	0	0	0	0	0	0	0
Arthropoda,Leucothoe spinicarpa			0	0	0	1	1	1	0	0	0	1	1	0	0	0	0	0	0	0
Arthropoda,Liocarcinus navigator			0	1	0	0	1	0	0	1	1	1	1	1	0	0	1	0	0	0
Arthropoda,Liocarcinus pusillus			0	0	0	0	0	0	0	0	0	0	0	0	0	0	0	0	0	0
Arthropoda,Listriella picta			0	0	0	1	0	0	0	0	0	0	0	0	0	0	0	0	0	0
Mollusca,Littorina fabalis			0	0	0	0	0	0	0	0	0	0	0	0	0	0	0	0	0	0
Mollusca,Littorina obtusata			0	0	0	0	0	0	0	0	0	0	0	0	0	0	0	0	0	0
Mollusca,Loripes lacteus			1	1	1	1	1	1	1	1	1	0	0	0	1	1	1	1	1	1
Mollusca,Lucinella divaricata			0	0	0	0	0	0	0	0	0	0	1	1	0	1	1	0	0	0
Mollusca,Lucinoma borealis			1	1	1	1	1	1	1	1	1	1	1	1	0	1	1	1	1	1
Annelida,Lumbrineris gracilis			1	1	1	0	0	0	0	0	0	1	1	1	0	0	0	0	0	0
Annelida,Lumbrineris latreilli			1	1	1	1	1	1	1	1	1	1	1	1	0	0	0	0	0	0
Mollusca,Lutraria angustior			0	0	0	0	0	0	0	0	0	0	0	0	0	0	0	0	0	0
Arthropoda,Lysianassa insperata			0	0	0	0	0	0	0	0	0	0	0	0	1	1	1	0	0	0
Arthropoda,Lysianassa plumosa			0	0	0	0	0	0	0	0	0	0	0	0	0	0	0	0	0	0
Arthropoda,Macropodia deflexa			0	0	0	0	0	0	0	0	0	0	0	0	0	0	0	0	0	0
Arthropoda,Macropodia linaresi			0	0	0	0	0	0	0	0	0	0	0	0	0	0	0	0	0	0
Arthropoda,Macropodia rostrata			0	0	0	1	0	0	0	0	0	0	0	0	0	0	1	0	0	0
Arthropoda,Maera grossimana			0	0	0	0	0	0	0	0	0	1	1	1	0	0	0	0	0	0
Arthropoda,Maera othonis			0	0	0	1	1	1	0	0	0	0	0	0	0	0	0	0	0	0
Annelida,Malacoceros fuliginosus			0	1	1	0	0	0	0	0	0	0	0	0	0	0	0	0	0	0
Annelida,Malacoceros girardii			0	0	1	1	1	1	1	1	1	1	0	0	0	0	0	0	0	0
Annelida,Malmgrenia andreapolis			0	0	0	0	1	1	0	0	0	0	0	0	0	0	0	0	0	0
Annelida,Malmgreniella arenicolae			0	0	0	1	1	1	0	0	0	1	1	1	0	0	0	0	0	0
Mollusca,Mangelia attenuata			0	0	0	0	0	0	0	0	0	0	0	0	0	0	0	0	0	0
Mollusca,Mangelia coarctata			0	0	0	0	0	0	0	0	0	0	0	0	0	0	0	0	0	0
Mollusca,Mangelia powisiana			0	0	0	0	0	0	0	0	0	0	0	0	0	0	0	0	0	0
Mollusca,Manzonia crassa			0	0	0	0	0	0	0	0	0	0	0	0	0	0	0	0	0	0
Annelida,Marphysa bellii			0	0	0	0	0	0	1	0	1	0	0	0	0	0	0	0	0	0
Annelida,Megalomma vesiculosum			1	1	1	1	1	1	0	1	1	0	0	0	0	0	1	1	1	0
Mollusca,Melanella alba			0	0	0	0	0	0	0	0	0	0	0	0	0	0	0	0	0	0
Annelida,Melinna palmata			1	1	1	0	0	0	0	0	0	0	0	0	0	0	0	1	1	1
Arthropoda,Metaphoxus pectinatus			0	0	0	1	0	0	0	0	0	0	1	0	0	0	0	0	0	0
Arthropoda,Microdeutopus anomalus			1	1	1	1	1	0	0	1	1	0	0	0	0	0	0	0	0	0
Arthropoda,Microdeutopus sp.			1	1	1	0	0	0	1	1	1	0	0	0	0	0	0	0	1	1
Arthropoda,Microdeutopus stationis			0	0	0	0	0	0	0	0	1	0	0	0	0	0	0	0	0	0
Arthropoda,Microdeutopus versiculatus			1	0	1	1	1	1	0	1	1	1	1	1	0	0	0	0	0	0
Arthropoda,Microprotopus maculatus			1	0	0	1	1	0	0	0	0	0	0	0	0	0	0	0	0	0
Annelida,Microspio mecznikowianus			1	1	1	0	0	1	1	1	1	0	0	0	0	0	0	1	0	1
Mollusca,Modiolarca tumida			0	0	0	1	0	0	0	0	0	0	0	0	0	0	0	0	0	0
Mollusca,Modiolus adriaticus			0	0	0	0	0	0	0	0	0	0	1	0	0	0	0	0	0	0
Chordata,Myoxocephalus scorpius			0	0	0	0	0	0	0	0	0	0	0	0	0	0	0	0	0	0
Mollusca,Mysella bidentata			0	1	1	1	1	1	0	0	0	1	1	1	1	1	1	0	0	0
Mollusca,Nassarius incrassatus			0	0	0	1	0	0	0	0	0	1	0	1	0	0	0	0	0	0
Mollusca,Nassarius reticulatus			1	1	1	1	1	1	1	1	1	1	1	1	1	1	1	1	1	1
Arthropoda,Nebalia bipes			1	0	1	0	0	0	0	0	1	0	0	0	1	1	1	0	0	0
Annelida,Nematonereis hebes			0	0	0	1	1	1	1	1	1	1	1	1	0	0	0	1	0	0
Nemerta,Nemerta sp.			0	0	0	0	0	0	0	0	1	0	0	0	0	0	1	0	0	0
Annelida,Neoamphitrite figulus			0	0	0	1	0	0	0	0	0	0	0	0	0	0	0	0	0	0
Annelida,Nephtys assimilis			0	0	0	0	0	0	0	0	1	0	0	0	0	0	0	0	0	0
Annelida,Nephtys caeca			1	0	0	0	0	0	0	0	0	0	0	0	0	0	0	0	0	0
Annelida,Nephtys cirrosa			0	0	0	0	0	0	0	0	0	0	0	0	0	0	0	0	0	0
Annelida,Nephtys hombergii			0	0	1	0	1	0	1	0	1	0	0	0	1	1	1	1	1	0
Annelida,Nephtys sp.			0	0	0	0	0	0	0	0	1	0	0	0	0	0	0	0	0	0
Annelida,Nereimyra punctata			0	0	0	0	1	0	0	0	0	0	0	0	0	0	0	0	0	0
Chordata,Nerophis lumbriciformis			0	0	0	0	0	0	0	0	0	0	0	0	0	0	0	0	0	0
Chordata,Nerophis ophidion			0	0	0	0	0	0	0	0	0	0	0	0	0	0	0	0	0	0
Annelida,Notomastus latericeus			1	1	1	1	1	1	1	1	1	1	1	1	1	1	1	1	1	1
Mollusca,Nucula nucleus			0	0	0	0	0	0	0	0	0	0	0	0	0	0	0	0	0	0
Arthropoda,Nymphon gracile			0	0	0	0	0	0	0	0	0	0	0	0	0	0	0	0	0	0
Mollusca,Ocenebra erinacea			0	0	0	0	0	0	0	0	0	0	0	0	0	0	0	0	0	0
Mollusca,Odostomia unidentata			0	0	0	0	0	0	0	0	0	0	0	0	0	0	0	0	0	0
Annelida,Oligochaeta spp.			0	0	0	0	0	0	0	0	0	0	0	0	0	0	0	0	0	0
Mollusca,Onoba semicostata			0	0	0	0	0	0	0	0	0	0	0	0	0	0	0	0	0	0
Echinodermata,Ophiothrix fragilis			0	0	0	0	0	0	0	0	0	0	0	0	0	0	0	0	0	0
Echinodermata,Ophiura albida			0	0	0	1	0	1	1	0	0	0	0	0	1	1	1	0	0	0
Arthropoda,Ostracoda spp.			1	0	0	1	1	1	0	0	0	0	0	0	1	1	1	0	0	0
Arthropoda,Pagurus bernhardus			0	0	0	0	0	1	1	0	1	0	1	1	0	0	0	0	0	0
Arthropoda,Pagurus cuanensis			0	0	0	0	0	1	0	1	1	0	1	1	0	0	0	0	0	0
Arthropoda,Palaemon adspersus			0	0	0	0	0	0	0	0	0	0	0	0	0	0	0	0	0	0
Arthropoda,Palaemon elegans			0	0	0	0	0	0	0	0	0	0	0	0	0	0	0	0	0	0
Arthropoda,Palaemon longirostris			0	0	0	0	0	0	0	0	0	0	0	0	0	0	0	0	0	0
Arthropoda,Palaemon serratus			0	0	0	0	0	0	0	0	0	0	0	0	0	0	0	0	0	0
Arthropoda,Palaemonetes varians			0	0	0	0	0	0	0	0	0	0	0	0	0	0	0	0	0	0
Mollusca,Paphia aurea			0	0	0	0	0	0	0	0	0	1	0	0	0	0	0	0	0	1
Mollusca,Paphia rhomboides			0	0	0	0	1	1	0	0	0	0	1	0	0	0	0	1	1	1
Arthropoda,Paranthura nigropunctata			0	0	0	1	1	0	0	0	0	0	0	0	0	0	0	0	0	0
Arthropoda,Pariambus typicus			0	0	0	0	0	0	0	1	1	0	0	0	0	0	0	0	0	0
Mollusca,Parvicardium exiguum			1	1	1	1	0	1	0	0	0	0	0	0	0	0	0	1	1	0
Mollusca,Patella spp.			0	0	0	0	0	0	0	0	0	0	0	0	0	0	0	0	0	0
Mollusca,Pecten maximus			0	0	0	0	0	0	0	0	0	0	0	0	0	0	0	0	0	0
Annelida,Perinereis cultrifera			1	1	1	0	0	0	1	0	0	1	0	1	0	0	0	0	0	0
Arthropoda,Perioculodes longimanus			0	0	0	1	0	0	1	1	1	0	0	0	0	0	0	0	0	0
Chordata,Phallusia mammillata			0	0	0	0	0	0	0	0	0	0	0	0	0	0	0	0	0	0
Arthropoda,Philocheras fasciatus			0	1	0	0	0	0	0	1	1	0	0	0	0	0	0	0	1	1
Arthropoda,Philocheras trispinosus			0	0	0	0	0	0	0	0	0	0	0	0	0	0	0	0	0	0
Annelida,Pholoe inornata			0	1	0	1	0	1	0	0	0	1	1	1	0	0	0	0	0	0
Arthropoda,Phtisica marina			0	0	0	0	1	1	1	1	1	0	0	1	0	0	0	1	1	1
Annelida,Phyllodoce maculata			0	0	0	0	0	0	0	0	0	0	0	0	0	0	0	0	0	0
Annelida,Phyllodoce mucosa			1	1	1	0	1	0	0	0	0	0	0	0	1	1	1	0	1	1
Annelida,Phyllodoce sp.			0	0	0	0	0	0	0	0	0	0	0	0	0	0	0	0	0	0
Annelida,Phylo foetida			0	0	0	0	0	0	0	0	0	0	0	0	0	0	0	0	0	0
Arthropoda,Pilumnus hirtellus			0	0	0	0	0	1	0	0	0	1	0	0	0	1	0	0	0	0
Arthropoda,Pirimela denticulata			0	0	0	0	1	1	0	0	0	0	0	0	0	0	0	0	0	0
Annelida,Piromis eruca			0	0	0	0	1	0	0	0	0	1	1	1	0	0	0	0	0	0
Arthropoda,Pisa tetraodon			0	0	0	0	0	0	0	0	0	0	0	0	0	0	0	0	0	0
Arthropoda,Pisidia longicornis			0	0	0	0	0	0	0	0	0	1	1	1	0	0	0	0	0	0
Annelida,Platynereis dumerilii			1	1	1	1	1	1	1	1	0	0	0	0	0	0	1	1	1	1
Chordata,Pleuronectes platessa			0	0	0	0	0	0	0	0	0	0	0	0	0	0	0	0	0	0
Arthropoda,Podocerus variegatus			0	0	0	0	0	0	0	0	0	0	0	0	0	0	0	0	0	0
Annelida,Poecilochaetus serpens			0	0	0	0	0	0	1	1	1	0	0	0	0	0	0	1	1	1
Annelida,Polycirrus aurantiacus			0	0	0	1	1	1	1	0	0	1	1	1	1	1	1	0	0	0
Chordata,Pomatoschistus minutus			0	0	0	0	0	0	0	0	0	0	0	0	0	0	0	0	0	0
Chordata,Pomatoschistus pictus			0	0	0	0	0	0	0	0	0	0	0	0	0	0	0	0	0	0
Arthropoda,Pontocrates arenarius			0	0	0	0	0	0	0	0	0	0	0	0	0	0	0	0	0	0
Arthropoda,Praunus flexuosus			0	0	0	0	0	0	0	0	0	0	0	0	0	0	0	0	0	0
Annelida,Prionospio sp.			0	0	0	0	0	0	0	0	1	0	1	0	0	0	0	0	0	0
Arthropoda,Processa edulis crassipes			0	1	1	0	0	0	0	0	0	1	1	1	1	0	0	0	0	0
Arthropoda,Processa sp.			0	0	0	0	0	0	0	0	0	0	0	0	0	0	0	0	0	0
Annelida,Protocirrineris Chrysoderma			0	0	0	0	0	0	0	0	0	0	1	0	0	0	0	0	0	0
Annelida,Protodorvillea kefersteini			0	0	0	0	0	0	0	0	0	0	0	0	0	0	0	0	0	0
Echinodermata,Psammechinus miliaris			0	0	0	0	0	0	0	0	0	0	0	0	0	0	0	0	0	0
Arthropoda,Pseudocuma similis			0	0	0	0	0	0	0	0	0	0	0	0	0	0	1	0	0	0
Mollusca,Raphitoma linearis			0	0	0	0	0	0	0	0	0	0	0	0	0	0	0	0	0	0
Mollusca,Raphitoma purpurea			0	0	0	0	0	0	0	0	0	0	0	0	0	0	0	0	0	0
Mollusca,Retusa obtusa			0	0	0	0	0	0	0	0	0	0	0	0	0	0	0	0	0	0
Mollusca,Rissoa guerinii			0	0	0	0	0	0	0	0	0	0	0	0	0	0	0	0	0	0
Mollusca,Rissoa lilacina			0	0	0	0	0	0	0	0	0	0	0	0	0	0	0	0	0	0
Mollusca,Rissoa membranacea			0	0	0	0	0	0	0	0	0	0	0	0	0	0	0	0	0	0
Mollusca,Rissoa parva			0	0	0	0	0	0	0	0	0	0	0	0	0	0	0	0	0	0
Mollusca,Rissoella diaphana			0	0	0	0	0	0	0	0	0	0	0	0	0	0	0	0	0	0
Annelida,Sabella pavonina			0	0	0	0	0	0	0	0	0	0	0	0	1	0	0	0	0	0
Annelida,Scalibregma celticum			1	0	0	1	1	1	0	0	0	1	1	1	0	0	0	0	0	0
Annelida,Schistomeringos rudolphi			0	0	0	0	0	0	0	0	0	1	0	0	0	0	0	0	0	0
Annelida,Scoletoma impatiens			0	0	0	0	0	0	0	0	0	0	0	1	0	0	0	0	0	0
Annelida,Scoloplos armiger			0	0	0	0	0	0	1	0	0	0	0	0	1	1	1	0	0	1
Arthropoda,Siphonoecetes kroyeranus			1	1	1	0	0	0	0	0	0	0	0	0	0	0	0	0	0	0
Arthropoda,Socarnes erythrophtalmus			0	0	0	0	0	0	0	0	0	0	0	0	0	0	0	0	0	0
Chordata,Spinachia spinachia			0	0	0	0	0	0	0	0	0	0	0	0	0	0	0	0	0	0
Annelida,Spio arndti			0	0	0	0	1	1	1	1	1	0	0	0	1	1	1	1	0	0
Annelida,Spio filicornis			0	0	0	0	0	0	0	0	1	0	0	0	0	0	0	0	0	0
Arthropoda,Stenothoe monoculoides			0	0	0	0	0	0	0	0	0	0	0	0	0	0	0	0	0	0
Annelida,Sthenelais boa			0	0	0	1	1	1	0	0	1	0	0	0	0	0	1	0	0	0
Chordata,Styela clava			0	0	0	0	0	0	0	0	0	0	0	0	0	0	0	0	0	0
Porifera,Suberites sp.			0	0	0	0	0	0	0	0	0	0	0	0	0	0	0	0	0	0
Arthropoda,Sunamphitoe pelagica			0	0	0	0	0	0	0	0	0	0	0	0	0	0	0	0	0	0
Annelida,Syllidia armata			0	0	0	0	1	1	0	0	0	0	0	0	0	0	0	0	0	0
Annelida,Syllis amica			0	0	0	1	0	0	0	0	0	0	0	0	0	0	0	0	0	0
Annelida,Syllis garciai			0	0	0	0	0	0	0	0	0	0	0	0	0	0	0	0	0	0
Annelida,Syllis variegata			0	0	0	0	0	0	0	0	0	0	0	0	0	0	0	0	0	0
Chordata,Symphodus melops			0	0	0	0	0	0	0	0	0	0	0	0	0	0	0	0	0	0
Arthropoda,Synchelidium maculatum			0	0	0	0	0	0	0	0	0	0	0	0	1	0	0	0	0	0
Chordata,Syngnathus acus			0	0	0	0	0	0	0	0	0	0	0	0	0	0	0	0	0	0
Chordata,Syngnathus typhle			0	0	0	0	0	0	0	0	0	0	0	0	0	0	0	0	0	0
Arthropoda,Synisoma lancifer			0	0	0	0	0	0	0	0	0	0	0	0	0	0	0	0	0	0
Arthropoda,Tanais dulongii			1	1	1	1	0	0	0	0	0	0	0	0	1	1	1	0	0	0
Mollusca,Tapes philippinarum			0	0	1	0	0	0	0	0	0	0	0	0	0	0	0	0	0	0
Chordata,Taurulus bubalis			0	0	0	0	0	0	0	0	0	0	0	0	0	0	0	0	0	0
Mollusca,Tellina donacina			0	0	0	0	0	0	0	0	1	0	0	0	0	0	0	0	0	0
Mollusca,Tellina fabula			0	0	0	1	0	1	0	0	0	0	0	0	1	0	1	0	0	0
Mollusca,Tellina incarnata			0	0	0	0	0	0	1	0	1	0	0	0	0	0	0	0	0	1
Annelida,Terebellides stroemii			0	0	0	0	0	0	0	0	0	1	1	0	0	0	0	0	0	0
Arthropoda,Thoralus cranchii			0	0	0	0	0	1	0	0	0	0	0	0	0	0	0	0	0	0
Mollusca,Thyasira flexuosa			0	0	0	1	1	1	0	0	0	1	0	1	0	0	0	1	1	1
Mollusca,Timoclea ovata			0	0	0	0	0	0	0	0	0	0	0	0	0	0	0	0	0	0
Mollusca,Tricolia pullus			0	0	0	0	0	0	0	0	0	0	0	0	0	0	0	0	0	0
Mollusca,Trivia arctica			0	0	0	0	0	0	0	0	0	0	0	0	0	0	0	0	0	0
Mollusca,Trivia monacha			0	0	0	0	0	0	0	0	0	0	0	0	0	0	0	0	0	0
Arthropoda,Tryphosites longipes			0	0	0	0	0	0	0	0	0	0	0	0	1	1	1	0	0	0
Mollusca,Turbonilla lactea			0	0	0	0	0	0	0	0	0	0	0	0	0	0	0	0	0	0
Arthropoda,Urothoe brevicornis			0	0	0	0	0	0	0	0	0	0	0	0	1	0	1	0	0	0
Arthropoda,Urothoe poseidonis			0	0	0	0	0	0	0	0	0	0	0	0	1	1	1	0	0	0
Arthropoda,Urothoe pulchella			0	0	0	0	1	0	0	0	0	0	0	0	1	1	1	1	0	0
Arthropoda,Urothoe sp.			0	0	0	1	0	0	0	0	0	0	0	0	0	0	0	0	0	0
Mollusca,Venerupis corrugata			0	0	0	0	0	0	0	0	1	1	0	0	0	0	0	0	0	0
Mollusca,Venus verrucosa			1	0	0	0	0	0	0	0	0	0	0	1	0	0	0	0	0	0
Neanthes caudata
Spio martinensis
Polybius arcuatus
