# Supplementary material for: Metabarcoding Is Powerful yet Still Blind: A Comparative Analysis of Morphological and Molecular Surveys of Seagrass Communities
Source: PLoS One. 2015 Feb 10;10(2):e0117562. doi: 10.1371/journal.pone.0117562 (PMC4323199; doi:10.1371/journal.pone.0117562)
Supplement: S2 Dataset — Included are MOTU names, the GenBank identifying number (GI), the e-value, the closest species match, the kingdom, the phylum (for Eukarya only), and the frequencies of each kingdom present in the dataset. The blastn algorithm was implemented under default parameters (see Appendix C of the BLAST command line applications user manual, http://www.ncbi.nlm.nih.gov/books/NBK1763/). (XLSX) [file pone.0117562.s002.xlsx]

## Sheet: S2 Dataset
S2 Dataset	COI BLASTN Results		algorithm= blastn, default values: evalue (10.0), word size (11), gapopen(5), gapextend (2), reward (2), penalty (-3), percent identity (0), found on in Appendix C of BLAST Command Line Applications User Manual
											http://www.ncbi.nlm.nih.gov/books/NBK1763/
MOTUs	GI	Evalue	Species	Kingdom	Phylum (Eukarya ONLY)
denovo10020	CP003843	2e-112	Candidatus Nitrosopumilus sp. AR2	Archaea
denovo10651	CP003843	6e-106	Candidatus Nitrosopumilus sp. AR2	Archaea			Number of OTUs	Frequency
denovo10900	CP003843	1e-102	Candidatus Nitrosopumilus sp. AR2	Archaea		Unknown	91	0.00725215
denovo11000	CP003843	3e-109	Candidatus Nitrosopumilus sp. AR2	Archaea		Virus	13	0.00103602
denovo1120	CP003843	3e-103	Candidatus Nitrosopumilus sp. AR2	Archaea		Archaea	183	0.014584
denovo11577	CP003843	2e-119	Candidatus Nitrosopumilus sp. AR2	Archaea		Bacteria	8775	0.699315
denovo12111	CP007061	3.8	Halobacterium sp. DL1	Archaea		Eukarya	3486	0.277813
denovo12533	CP003843	7e-105	Candidatus Nitrosopumilus sp. AR2	Archaea		Total	12548	1
denovo12612	CP002565	0.0005	Methanosaeta concilii GP6	Archaea
denovo12749	CP003843	1e-113	Candidatus Nitrosopumilus sp. AR2	Archaea
denovo1315	CP003843	7e-105	Candidatus Nitrosopumilus sp. AR2	Archaea			Number of OTUs	Frequency
denovo13475	CP003843	1e-113	Candidatus Nitrosopumilus sp. AR2	Archaea		Metazoans	2695	0.773092
denovo14565	CP003843	6e-106	Candidatus Nitrosopumilus sp. AR2	Archaea		Non-metazoans	791	0.226908
denovo14911	CP003843	3e-110	Candidatus Nitrosopumilus sp. AR2	Archaea		Total	3486	1
denovo15788	CP003378	1e-11	Caldisphaera lagunensis DSM 15908	Archaea
denovo16004	CP003843	1e-107	Candidatus Nitrosopumilus sp. AR2	Archaea
denovo16485	CP003843	2e-93	Candidatus Nitrosopumilus sp. AR2	Archaea
denovo1763	KF900310	3.6	uncultured marine group II/III euryarchaeote AD1000_04_B09	Archaea
denovo18119	CP003843	8e-104	Candidatus Nitrosopumilus sp. AR2	Archaea
denovo18676	AE010299	8e-21	Methanosarcina acetivorans C2A	Archaea
denovo19237	CP003843	2e-106	Candidatus Nitrosopumilus sp. AR2	Archaea
denovo19544	CP003843	2e-86	Candidatus Nitrosopumilus sp. AR2	Archaea
denovo19616	HE613800	1e-13	Pyrococcus abyssi GE5	Archaea
denovo19797	CP002670	0.3	Pyrococcus sp. NA2	Archaea
denovo20193	CP003843	3e-103	Candidatus Nitrosopumilus sp. AR2	Archaea
denovo20472	CP003843	4e-108	Candidatus Nitrosopumilus sp. AR2	Archaea
denovo20577	CP003843	1e-95	Candidatus Nitrosopumilus sp. AR2	Archaea
denovo2105	CP003843	4e-107	Candidatus Nitrosopumilus sp. AR2	Archaea
denovo21732	CP003843	2e-105	Candidatus Nitrosopumilus sp. AR2	Archaea
denovo22350	CP003843	2e-118	Candidatus Nitrosopumilus sp. AR2	Archaea
denovo23385	CP003843	1e-101	Candidatus Nitrosopumilus sp. AR2	Archaea
denovo23880	CP003843	2e-98	Candidatus Nitrosopumilus sp. AR2	Archaea
denovo25127	KF900591	1	uncultured marine group II/III euryarchaeote KM3_133_A04	Archaea
denovo25328	AE010299	0.36	Methanosarcina acetivorans C2A	Archaea
denovo25731	CP003929	0.025	Natronococcus occultus SP4	Archaea
denovo25797	CP003843	4e-89	Candidatus Nitrosopumilus sp. AR2	Archaea
denovo25884	CP003843	9e-72	Candidatus Nitrosopumilus sp. AR2	Archaea
denovo26095	CP003843	3e-123	Candidatus Nitrosopumilus sp. AR2	Archaea
denovo2639	CP003843	2e-98	Candidatus Nitrosopumilus sp. AR2	Archaea
denovo27507	FN773399	3e-13	uncultured archaeon	Archaea
denovo27638	CP003843	4e-114	Candidatus Nitrosopumilus sp. AR2	Archaea
denovo28135	CP003843	3e-135	Candidatus Nitrosopumilus sp. AR2	Archaea
denovo28433	CP003843	5e-100	Candidatus Nitrosopumilus sp. AR2	Archaea
denovo28677	CP003843	8e-98	Candidatus Nitrosopumilus sp. AR2	Archaea
denovo29817	CP002772	0.026	Methanobacterium sp. SWAN-1	Archaea
denovo30177	CP003843	2e-112	Candidatus Nitrosopumilus sp. AR2	Archaea
denovo3025	CP003843	4e-101	Candidatus Nitrosopumilus sp. AR2	Archaea
denovo30327	CP003843	5e-113	Candidatus Nitrosopumilus sp. AR2	Archaea
denovo30530	CP009149	1e-19	Methanocaldococcus sp. JH146	Archaea
denovo30890	CP001860	0.006	Haloterrigena turkmenica DSM 5511	Archaea
denovo3094	CP003534	0.32	Pyrococcus sp. ST04	Archaea
denovo31065	CP003843	2e-104	Candidatus Nitrosopumilus sp. AR2	Archaea
denovo31166	CP003843	4e-121	Candidatus Nitrosopumilus sp. AR2	Archaea
denovo31514	CP000866	3e-82	Nitrosopumilus maritimus SCM1	Archaea
denovo31601	CP003843	4e-114	Candidatus Nitrosopumilus sp. AR2	Archaea
denovo31721	CP000477	2e-07	Methanosaeta thermophila PT	Archaea
denovo3185	CP003843	8e-123	Candidatus Nitrosopumilus sp. AR2	Archaea
denovo33081	CP003843	4e-89	Candidatus Nitrosopumilus sp. AR2	Archaea
denovo33691	CP003843	8e-117	Candidatus Nitrosopumilus sp. AR2	Archaea
denovo34006	CP003843	7e-124	Candidatus Nitrosopumilus sp. AR2	Archaea
denovo34011	CP003843	2e-112	Candidatus Nitrosopumilus sp. AR2	Archaea
denovo34189	AP011952	0.31	Methanothermobacter thermautotrophicus CaT2	Archaea
denovo34231	CP003843	1e-89	Candidatus Nitrosopumilus sp. AR2	Archaea
denovo34668	CP003843	8e-117	Candidatus Nitrosopumilus sp. AR2	Archaea
denovo34840	CP003843	3e-109	Candidatus Nitrosopumilus sp. AR2	Archaea
denovo34858	CP003843	1e-89	Candidatus Nitrosopumilus sp. AR2	Archaea
denovo35552	CP003843	2e-118	Candidatus Nitrosopumilus sp. AR2	Archaea
denovo35575	AE010299	0.03	Methanosarcina acetivorans C2A	Archaea
denovo36119	CP003843	2e-105	Candidatus Nitrosopumilus sp. AR2	Archaea
denovo36225	CP003843	1e-115	Candidatus Nitrosopumilus sp. AR2	Archaea
denovo36734	CP003843	7e-105	Candidatus Nitrosopumilus sp. AR2	Archaea
denovo36928	CP003843	2e-100	Candidatus Nitrosopumilus sp. AR2	Archaea
denovo3699	CP003843	6e-92	Candidatus Nitrosopumilus sp. AR2	Archaea
denovo371	CP003842	1e-81	Candidatus Nitrosopumilus koreensis AR1	Archaea
denovo3716	CP003843	1e-126	Candidatus Nitrosopumilus sp. AR2	Archaea
denovo37365	KF900718	1.2	uncultured marine group II/III euryarchaeote KM3_176_D12	Archaea
denovo38236	CP003843	1e-102	Candidatus Nitrosopumilus sp. AR2	Archaea
denovo38299	CP003167	7e-16	Methanoregula formicica SMSP	Archaea
denovo38862	CP003843	8e-98	Candidatus Nitrosopumilus sp. AR2	Archaea
denovo39215	CP003843	1e-113	Candidatus Nitrosopumilus sp. AR2	Archaea
denovo39900	CP003843	1e-94	Candidatus Nitrosopumilus sp. AR2	Archaea
denovo40093	CP003843	7e-111	Candidatus Nitrosopumilus sp. AR2	Archaea
denovo4067	CP003843	3e-115	Candidatus Nitrosopumilus sp. AR2	Archaea
denovo40725	CP007060	0.3	Halobacterium sp. DL1	Archaea
denovo40750	AM114193	6e-17	Methanocella arvoryzae MRE50	Archaea
denovo40952	CP003843	4e-114	Candidatus Nitrosopumilus sp. AR2	Archaea
denovo41516	CP003843	4e-121	Candidatus Nitrosopumilus sp. AR2	Archaea
denovo41887	CP003843	4e-95	Candidatus Nitrosopumilus sp. AR2	Archaea
denovo42047	CP006965	3.6	Thermococcus sp. ES1	Archaea
denovo42337	CP003843	3e-103	Candidatus Nitrosopumilus sp. AR2	Archaea
denovo42488	CP003843	5e-119	Candidatus Nitrosopumilus sp. AR2	Archaea
denovo43759	CP003843	2e-104	Candidatus Nitrosopumilus sp. AR2	Archaea
denovo44284	CP003843	3e-97	Candidatus Nitrosopumilus sp. AR2	Archaea
denovo45686	CP000780	9e-31	Methanoregula boonei 6A8	Archaea
denovo4590	CP003843	4e-108	Candidatus Nitrosopumilus sp. AR2	Archaea
denovo4617	CP003843	1e-108	Candidatus Nitrosopumilus sp. AR2	Archaea
denovo46336	CP003843	4e-95	Candidatus Nitrosopumilus sp. AR2	Archaea
denovo46582	CP003843	9e-97	Candidatus Nitrosopumilus sp. AR2	Archaea
denovo47048	CP003843	1e-101	Candidatus Nitrosopumilus sp. AR2	Archaea
denovo48307	CP003412	1e-06	Natrinema sp. J7-2	Archaea
denovo48823	CP003843	2e-98	Candidatus Nitrosopumilus sp. AR2	Archaea
denovo48857	CP002565	6e-10	Methanosaeta concilii GP6	Archaea
denovo49055	CP000866	0.002	Nitrosopumilus maritimus SCM1	Archaea
denovo49838	CP003843	7e-111	Candidatus Nitrosopumilus sp. AR2	Archaea
denovo49869	CP003843	3e-116	Candidatus Nitrosopumilus sp. AR2	Archaea
denovo50820	CP003843	6e-93	Candidatus Nitrosopumilus sp. AR2	Archaea
denovo51173	CP007264	0.0006	Thermococcus nautilus	Archaea
denovo51836	CP003843	4e-121	Candidatus Nitrosopumilus sp. AR2	Archaea
denovo5237	AE010299	0.025	Methanosarcina acetivorans C2A	Archaea
denovo53366	CP003843	4e-107	Candidatus Nitrosopumilus sp. AR2	Archaea
denovo53957	CP003843	8e-98	Candidatus Nitrosopumilus sp. AR2	Archaea
denovo54523	CP002069	0.3	Methanohalobium evestigatum Z-7303	Archaea
denovo54756	CP003843	1e-102	Candidatus Nitrosopumilus sp. AR2	Archaea
denovo55118	BA000023	0.014	Sulfolobus tokodaii str. 7	Archaea
denovo5568	CP003843	7e-105	Candidatus Nitrosopumilus sp. AR2	Archaea
denovo55887	CP003843	5e-113	Candidatus Nitrosopumilus sp. AR2	Archaea
denovo57581	CP003843	2e-55	Candidatus Nitrosopumilus sp. AR2	Archaea
denovo57890	CP003843	2e-106	Candidatus Nitrosopumilus sp. AR2	Archaea
denovo58054	CP003843	2e-85	Candidatus Nitrosopumilus sp. AR2	Archaea
denovo58540	CP003843	2e-112	Candidatus Nitrosopumilus sp. AR2	Archaea
denovo58594	CP003843	6e-118	Candidatus Nitrosopumilus sp. AR2	Archaea
denovo59053	KF900950	0.007	uncultured marine thaumarchaeote KM3_56_F06	Archaea
denovo59956	KF901150	0.007	uncultured marine thaumarchaeote KM3_87_H02	Archaea
denovo60304	AM114193	2e-28	Methanocella arvoryzae MRE50	Archaea
denovo6132	CP003843	4e-95	Candidatus Nitrosopumilus sp. AR2	Archaea
denovo61400	CP003843	3e-122	Candidatus Nitrosopumilus sp. AR2	Archaea
denovo61417	CP003843	3e-97	Candidatus Nitrosopumilus sp. AR2	Archaea
denovo62597	CP003843	2e-118	Candidatus Nitrosopumilus sp. AR2	Archaea
denovo62683	CP003843	5e-100	Candidatus Nitrosopumilus sp. AR2	Archaea
denovo63676	CP003843	8e-117	Candidatus Nitrosopumilus sp. AR2	Archaea
denovo63794	CP002101	7e-08	Methanosalsum zhilinae DSM 4017	Archaea
denovo64212	CP003843	1e-107	Candidatus Nitrosopumilus sp. AR2	Archaea
denovo64900	CP003843	3e-82	Candidatus Nitrosopumilus sp. AR2	Archaea
denovo65024	CP003843	7e-86	Candidatus Nitrosopumilus sp. AR2	Archaea
denovo65028	KF901077	1.1	uncultured marine group II/III euryarchaeote KM3_76_H07	Archaea
denovo6514	CP003843	2e-118	Candidatus Nitrosopumilus sp. AR2	Archaea
denovo65171	KF900895	3e-08	uncultured marine thaumarchaeote KM3_46_G10	Archaea
denovo6518	CP003843	3e-109	Candidatus Nitrosopumilus sp. AR2	Archaea
denovo65577	CP003843	1e-100	Candidatus Nitrosopumilus sp. AR2	Archaea
denovo65782	CP003843	1e-95	Candidatus Nitrosopumilus sp. AR2	Archaea
denovo65946	CP003843	1e-107	Candidatus Nitrosopumilus sp. AR2	Archaea
denovo66192	CP003843	3e-115	Candidatus Nitrosopumilus sp. AR2	Archaea
denovo66220	CP003843	6e-93	Candidatus Nitrosopumilus sp. AR2	Archaea
denovo66378	CP003843	9e-78	Candidatus Nitrosopumilus sp. AR2	Archaea
denovo6688	CP003843	4e-101	Candidatus Nitrosopumilus sp. AR2	Archaea
denovo67511	CP003843	3e-116	Candidatus Nitrosopumilus sp. AR2	Archaea
denovo6787	CP003843	5e-94	Candidatus Nitrosopumilus sp. AR2	Archaea
denovo68207	CP003843	1e-100	Candidatus Nitrosopumilus sp. AR2	Archaea
denovo68561	CP003843	2e-93	Candidatus Nitrosopumilus sp. AR2	Archaea
denovo68691	CP003843	7e-142	Candidatus Nitrosopumilus sp. AR2	Archaea
denovo68771	CP003843	2e-105	Candidatus Nitrosopumilus sp. AR2	Archaea
denovo70347	CP002565	4e-12	Methanosaeta concilii GP6	Archaea
denovo70640	CP006577	1.1	Archaeoglobus fulgidus DSM 8774	Archaea
denovo7072	CP003843	3e-116	Candidatus Nitrosopumilus sp. AR2	Archaea
denovo71222	CP003843	4e-108	Candidatus Nitrosopumilus sp. AR2	Archaea
denovo71944	CP003843	8e-117	Candidatus Nitrosopumilus sp. AR2	Archaea
denovo72250	CP003843	2e-98	Candidatus Nitrosopumilus sp. AR2	Archaea
denovo72497	CP003843	5e-107	Candidatus Nitrosopumilus sp. AR2	Archaea
denovo72561	CP003685	0.001	Pyrococcus furiosus COM1	Archaea
denovo7427	CP003843	2e-99	Candidatus Nitrosopumilus sp. AR2	Archaea
denovo74488	CP003843	1e-107	Candidatus Nitrosopumilus sp. AR2	Archaea
denovo74666	CP003843	3e-96	Candidatus Nitrosopumilus sp. AR2	Archaea
denovo74675	CP003843	5e-113	Candidatus Nitrosopumilus sp. AR2	Archaea
denovo74844	CP003843	1e-113	Candidatus Nitrosopumilus sp. AR2	Archaea
denovo74980	CP003843	3e-103	Candidatus Nitrosopumilus sp. AR2	Archaea
denovo75432	CP003843	1e-67	Candidatus Nitrosopumilus sp. AR2	Archaea
denovo75640	CP003843	4e-107	Candidatus Nitrosopumilus sp. AR2	Archaea
denovo75651	CP003843	2e-112	Candidatus Nitrosopumilus sp. AR2	Archaea
denovo76109	KF900777	2e-35	uncultured marine group II/III euryarchaeote KM3_194_G04	Archaea
denovo76342	CP003843	8e-98	Candidatus Nitrosopumilus sp. AR2	Archaea
denovo76845	CP003843	5e-113	Candidatus Nitrosopumilus sp. AR2	Archaea
denovo77070	CP003843	5e-94	Candidatus Nitrosopumilus sp. AR2	Archaea
denovo77086	CP003843	3e-103	Candidatus Nitrosopumilus sp. AR2	Archaea
denovo7742	CP003843	1e-107	Candidatus Nitrosopumilus sp. AR2	Archaea
denovo78338	CP003843	2e-91	Candidatus Nitrosopumilus sp. AR2	Archaea
denovo78838	CP003843	6e-99	Candidatus Nitrosopumilus sp. AR2	Archaea
denovo79312	CP003843	7e-124	Candidatus Nitrosopumilus sp. AR2	Archaea
denovo8089	CP003843	8e-117	Candidatus Nitrosopumilus sp. AR2	Archaea
denovo8750	CP003843	8e-66	Candidatus Nitrosopumilus sp. AR2	Archaea
denovo8802	CP003843	1e-113	Candidatus Nitrosopumilus sp. AR2	Archaea
denovo91	CP003843	3e-116	Candidatus Nitrosopumilus sp. AR2	Archaea
denovo9480	CP003843	4e-120	Candidatus Nitrosopumilus sp. AR2	Archaea
denovo9897	CP003843	6e-106	Candidatus Nitrosopumilus sp. AR2	Archaea
denovo10021	CP000680	2e-66	Pseudomonas mendocina ymp	Bacteria
denovo10035	LK391695	2e-65	Pseudomonas pseudoalcaligenes	Bacteria
denovo10037	CP000514	9e-84	Marinobacter aquaeolei VT8	Bacteria
denovo10056	CP007152	3e-102	Marinobacter sp. R9SW1	Bacteria
denovo10060	CP007014	0.059	Pseudomonas syringae CC1557	Bacteria
denovo1007	AP012978	1e-125	endosymbiont of unidentified scaly snail isolate Monju	Bacteria
denovo10070	KF999931	1e-68	Alcaligenes sp. NX-3	Bacteria
denovo10071	HG966617	9e-65	bacterium Ec32	Bacteria
denovo10077	CP001291	6e-41	Cyanothece sp. PCC 7424	Bacteria
denovo10079	CP001339	2e-61	Thioalkalivibrio sulfidophilus HL-EbGr7	Bacteria
denovo10084	CP000514	5e-61	Marinobacter aquaeolei VT8	Bacteria
denovo10085	CP003734	1e-53	Pseudomonas putida DOT-T1E	Bacteria
denovo10087	CP000444	3e-45	Shewanella sp. MR-7	Bacteria
denovo1009	AP012978	7e-66	endosymbiont of unidentified scaly snail isolate Monju	Bacteria
denovo10102	FJ868209	1e-89	uncultured gamma proteobacterium	Bacteria
denovo10111	AP010904	4e-11	Desulfovibrio magneticus RS-1	Bacteria
denovo10117	AP012978	4e-69	endosymbiont of unidentified scaly snail isolate Monju	Bacteria
denovo10140	CP000830	9e-97	Dinoroseobacter shibae DFL 12	Bacteria
denovo1015	CP000301	2e-67	Rhodopseudomonas palustris BisB18	Bacteria
denovo10156	AE017282	8e-72	Methylococcus capsulatus str. Bath	Bacteria
denovo10157	CP006966	3e-109	Phaeobacter gallaeciensis DSM 26640	Bacteria
denovo10175	CP001096	4e-44	Rhodopseudomonas palustris TIE-1	Bacteria
denovo1018	CP001339	3e-39	Thioalkalivibrio sulfidophilus HL-EbGr7	Bacteria
denovo10180	CP001339	1e-32	Thioalkalivibrio sulfidophilus HL-EbGr7	Bacteria
denovo102	CP000031	5e-113	Ruegeria pomeroyi DSS-3	Bacteria
denovo10210	CP003742	8e-91	Octadecabacter arcticus 238	Bacteria
denovo10211	CP002552	6e-143	Nitrosomonas sp. AL212	Bacteria
denovo10212	FJ868209	1e-87	uncultured gamma proteobacterium	Bacteria
denovo10218	CP000514	2e-73	Marinobacter aquaeolei VT8	Bacteria
denovo10224	CP000680	1e-107	Pseudomonas mendocina ymp	Bacteria
denovo10238	CP000613	7e-53	Rhodospirillum centenum SW	Bacteria
denovo10239	FJ868209	2e-67	uncultured gamma proteobacterium	Bacteria
denovo10240	CP001101	3e-06	Chlorobium phaeobacteroides BS1	Bacteria
denovo10248	FQ311868	7e-79	Azospirillum lipoferum 4B	Bacteria
denovo1026	CP003740	7e-117	Octadecabacter antarcticus 307	Bacteria
denovo10262	CP008884	1e-82	Dyella japonica A8	Bacteria
denovo10265	CP002083	5e-53	Hyphomicrobium denitrificans ATCC 51888	Bacteria
denovo10276	CP008884	1e-81	Dyella japonica A8	Bacteria
denovo10284	CP006773	3e-108	Leisingera methylohalidivorans DSM 14336	Bacteria
denovo10287	CP000514	6e-74	Marinobacter aquaeolei VT8	Bacteria
denovo10299	CP003725	2e-93	Pseudomonas stutzeri DSM 10701	Bacteria
denovo10303	FJ868209	6e-92	uncultured gamma proteobacterium	Bacteria
denovo10348	CP002418	5e-68	Rhodopseudomonas palustris DX-1	Bacteria
denovo10352	CP001339	3e-64	Thioalkalivibrio sulfidophilus HL-EbGr7	Bacteria
denovo10358	CP002881	3e-84	Pseudomonas stutzeri ATCC 17588 = LMG 11199	Bacteria
denovo10359	AP014622	2e-49	Pseudomonas aeruginosa	Bacteria
denovo10360	CP002018	2e-105	Ketogulonicigenium vulgare WSH-001	Bacteria
denovo10367	CP000830	9e-116	Dinoroseobacter shibae DFL 12	Bacteria
denovo1037	CP000155	3e-89	Hahella chejuensis KCTC 2396	Bacteria
denovo10379	CP007151	4e-69	Marinobacter sp. A3d10	Bacteria
denovo10418	CP006912	3e-89	Hyphomicrobium nitrativorans NL23	Bacteria
denovo1042	CP003654	0.098	Stanieria cyanosphaera PCC 7437	Bacteria
denovo10421	CP003653	0.0004	Stanieria cyanosphaera PCC 7437	Bacteria
denovo10443	JX454601	0.088	uncultured KB1 group bacterium Medee_0002	Bacteria
denovo10445	CP007444	9e-49	Dyella jiangningensis	Bacteria
denovo1045	FQ311868	1e-81	Azospirillum lipoferum 4B	Bacteria
denovo10451	CP003740	3e-96	Octadecabacter antarcticus 307	Bacteria
denovo10457	CP003740	9e-122	Octadecabacter antarcticus 307	Bacteria
denovo10458	CP007444	3e-90	Dyella jiangningensis	Bacteria
denovo10464	CP000514	3e-76	Marinobacter aquaeolei VT8	Bacteria
denovo10476	CP002738	3e-77	Methylomonas methanica MC09	Bacteria
denovo1050	CP002976	2e-129	Phaeobacter gallaeciensis DSM 17395 = CIP 105210	Bacteria
denovo10507	FJ868208	2e-135	uncultured gamma proteobacterium	Bacteria
denovo10515	CP000830	3e-95	Dinoroseobacter shibae DFL 12	Bacteria
denovo10522	CP002455	6e-33	Weeksella virosa DSM 16922	Bacteria
denovo10523	FJ899953	2e-21	Vesicomya sp. endosymbiont	Bacteria
denovo10538	FR695864	7e-06	uncultured Desulfobacterium sp.	Bacteria
denovo10549	CP002623	3e-108	Roseobacter litoralis Och 149	Bacteria
denovo10561	CP002542	7e-21	Fluviicola taffensis DSM 16823	Bacteria
denovo10565	CP000248	8e-91	Novosphingobium aromaticivorans DSM 12444	Bacteria
denovo10570	CP001339	1e-131	Thioalkalivibrio sulfidophilus HL-EbGr7	Bacteria
denovo10578	LK391695	2e-67	Pseudomonas pseudoalcaligenes	Bacteria
denovo10591	CP004014	5e-17	Staphylococcus pasteuri SP1	Bacteria
denovo10593	FQ311868	2e-72	Azospirillum lipoferum 4B	Bacteria
denovo10599	AP012978	2e-78	endosymbiont of unidentified scaly snail isolate Monju	Bacteria
denovo10601	CP007444	2e-85	Dyella jiangningensis	Bacteria
denovo10617	JQ913015	2e-60	uncultured gamma proteobacterium	Bacteria
denovo10627	CP003989	4e-88	Thioalkalivibrio nitratireducens DSM 14787	Bacteria
denovo10629	CP008884	6e-98	Dyella japonica A8	Bacteria
denovo10637	CP000489	1e-127	Paracoccus denitrificans PD1222	Bacteria
denovo10638	CP001339	2e-59	Thioalkalivibrio sulfidophilus HL-EbGr7	Bacteria
denovo10643	FP929050	0.3	Roseburia intestinalis XB6B4	Bacteria
denovo10648	CP003989	8e-97	Thioalkalivibrio nitratireducens DSM 14787	Bacteria
denovo10676	LK391695	5e-62	Pseudomonas pseudoalcaligenes	Bacteria
denovo10678	CP003989	1e-95	Thioalkalivibrio nitratireducens DSM 14787	Bacteria
denovo10679	AP012978	2e-104	endosymbiont of unidentified scaly snail isolate Monju	Bacteria
denovo10689	CP003725	2e-106	Pseudomonas stutzeri DSM 10701	Bacteria
denovo10697	FO203503	2e-61	Desulfobacula toluolica Tol2	Bacteria
denovo10707	CP001339	2e-40	Thioalkalivibrio sulfidophilus HL-EbGr7	Bacteria
denovo10708	CP002568	2e-61	Polymorphum gilvum SL003B-26A1	Bacteria
denovo1071	CP007509	9e-97	Pseudomonas stutzeri	Bacteria
denovo10712	CP001339	1e-107	Thioalkalivibrio sulfidophilus HL-EbGr7	Bacteria
denovo10726	CP003655	8e-15	Stanieria cyanosphaera PCC 7437	Bacteria
denovo10748	CP003725	3e-96	Pseudomonas stutzeri DSM 10701	Bacteria
denovo10756	CP001339	2e-129	Thioalkalivibrio sulfidophilus HL-EbGr7	Bacteria
denovo10767	CP000514	5e-73	Marinobacter aquaeolei VT8	Bacteria
denovo10771	CP003620	2e-10	Crinalium epipsammum PCC 9333	Bacteria
denovo10781	CP005990	2e-93	Spiribacter sp. UAH-SP71	Bacteria
denovo10797	CP003725	3e-102	Pseudomonas stutzeri DSM 10701	Bacteria
denovo10802	AP012547	2e-80	Sulfuritalea hydrogenivorans sk43H	Bacteria
denovo10821	CP001339	3e-45	Thioalkalivibrio sulfidophilus HL-EbGr7	Bacteria
denovo10834	CP002738	3e-77	Methylomonas methanica MC09	Bacteria
denovo10835	HG966617	1e-75	bacterium Ec32	Bacteria
denovo10849	CP001339	8e-90	Thioalkalivibrio sulfidophilus HL-EbGr7	Bacteria
denovo1085	CP000472	2e-55	Shewanella piezotolerans WP3	Bacteria
denovo10851	CP007139	4e-06	Fimbriimonas ginsengisoli Gsoil 348	Bacteria
denovo10853	CP000155	4e-94	Hahella chejuensis KCTC 2396	Bacteria
denovo10854	CP007151	4e-88	Marinobacter sp. A3d10	Bacteria
denovo10865	AP012547	4e-82	Sulfuritalea hydrogenivorans sk43H	Bacteria
denovo10874	CP007151	1e-59	Marinobacter sp. A3d10	Bacteria
denovo1089	CP001339	3e-114	Thioalkalivibrio sulfidophilus HL-EbGr7	Bacteria
denovo10897	FQ976920	0.002	Magnetospirillum sp. pMbN1	Bacteria
denovo10903	CP002620	3e-84	Pseudomonas mendocina NK-01	Bacteria
denovo10905	CP001339	5e-42	Thioalkalivibrio sulfidophilus HL-EbGr7	Bacteria
denovo10906	CP001649	3e-20	Desulfovibrio salexigens DSM 2638	Bacteria
denovo10914	CP000155	3e-89	Hahella chejuensis KCTC 2396	Bacteria
denovo10919	AP010946	5e-87	Azospirillum sp. B510	Bacteria
denovo10940	CP000680	9e-84	Pseudomonas mendocina ymp	Bacteria
denovo10963	LK391695	2e-84	Pseudomonas pseudoalcaligenes	Bacteria
denovo10965	CP003725	7e-98	Pseudomonas stutzeri DSM 10701	Bacteria
denovo10990	CP001997	6e-15	Aminobacterium colombiense DSM 12261	Bacteria
denovo11022	CP002972	5e-106	Phaeobacter gallaeciensis 2.10	Bacteria
denovo11042	CP000103	1e-76	Nitrosospira multiformis ATCC 25196	Bacteria
denovo11044	CP001339	1e-138	Thioalkalivibrio sulfidophilus HL-EbGr7	Bacteria
denovo11064	CP000155	4e-107	Hahella chejuensis KCTC 2396	Bacteria
denovo11083	AP012978	2e-123	endosymbiont of unidentified scaly snail isolate Monju	Bacteria
denovo11093	CP002568	6e-105	Polymorphum gilvum SL003B-26A1	Bacteria
denovo11108	CP003734	4e-25	Pseudomonas putida DOT-T1E	Bacteria
denovo11117	CP007444	1e-100	Dyella jiangningensis	Bacteria
denovo11124	LK391695	6e-67	Pseudomonas pseudoalcaligenes	Bacteria
denovo11145	CP001661	0.0006	Geobacter sp. M21	Bacteria
denovo11152	HG966617	7e-98	bacterium Ec32	Bacteria
denovo11167	CP006912	1e-95	Hyphomicrobium nitrativorans NL23	Bacteria
denovo11176	CP007444	6e-86	Dyella jiangningensis	Bacteria
denovo11177	CP003653	7e-54	Stanieria cyanosphaera PCC 7437	Bacteria
denovo11198	CP002585	2e-91	Pseudomonas brassicacearum subsp. brassicacearum NFM421	Bacteria
denovo11208	EU795288	8e-39	uncultured bacterium OMZ60_11M11	Bacteria
denovo1122	CP002629	0.33	Desulfobacca acetoxidans DSM 11109	Bacteria
denovo11231	CP003746	2e-110	Simiduia agarivorans SA1 = DSM 21679	Bacteria
denovo1125	CP001339	2e-78	Thioalkalivibrio sulfidophilus HL-EbGr7	Bacteria
denovo1126	LK391695	4e-76	Pseudomonas pseudoalcaligenes	Bacteria
denovo11263	CP005990	2e-91	Spiribacter sp. UAH-SP71	Bacteria
denovo11286	CP002056	7e-117	Methylotenera versatilis 301	Bacteria
denovo11287	CP004846	2e-60	Alteromonas macleodii str. 'English Channel 615'	Bacteria
denovo11291	CP000830	4e-127	Dinoroseobacter shibae DFL 12	Bacteria
denovo113	CP001339	2e-116	Thioalkalivibrio sulfidophilus HL-EbGr7	Bacteria
denovo11304	CP003178	1e-31	Niastella koreensis GR20-10	Bacteria
denovo11308	CP007152	2e-67	Marinobacter sp. R9SW1	Bacteria
denovo1132	CP003989	7e-66	Thioalkalivibrio nitratireducens DSM 14787	Bacteria
denovo11321	FJ868208	2e-136	uncultured gamma proteobacterium	Bacteria
denovo11324	AP012547	1e-82	Sulfuritalea hydrogenivorans sk43H	Bacteria
denovo1133	CP005963	2e-92	Spiribacter salinus M19-40	Bacteria
denovo11331	CP001096	6e-42	Rhodopseudomonas palustris TIE-1	Bacteria
denovo11338	CP001281	2e-09	Thauera sp. MZ1T	Bacteria
denovo11341	CP000507	1e-68	Shewanella amazonensis SB2B	Bacteria
denovo11360	CP003538	2e-67	Micavibrio aeruginosavorus EPB	Bacteria
denovo1137	CP002623	2e-131	Roseobacter litoralis Och 149	Bacteria
denovo11371	CP003989	7e-85	Thioalkalivibrio nitratireducens DSM 14787	Bacteria
denovo1138	CP002360	1e-18	Mahella australiensis 50-1 BON	Bacteria
denovo11385	CP003725	3e-115	Pseudomonas stutzeri DSM 10701	Bacteria
denovo11399	CP000390	2e-91	Chelativorans sp. BNC1	Bacteria
denovo1140	AP012547	2e-79	Sulfuritalea hydrogenivorans sk43H	Bacteria
denovo11401	CP005587	2e-80	Hyphomicrobium denitrificans 1NES1	Bacteria
denovo11403	CP000859	5e-18	Desulfococcus oleovorans Hxd3	Bacteria
denovo11420	FR695868	2e-61	uncultured Desulfobacterium sp.	Bacteria
denovo11435	CP001339	4e-43	Thioalkalivibrio sulfidophilus HL-EbGr7	Bacteria
denovo11439	CP003734	9e-64	Pseudomonas putida DOT-T1E	Bacteria
denovo11448	CP000319	6e-61	Nitrobacter hamburgensis X14	Bacteria
denovo11450	CP008896	2e-59	Pseudomonas fluorescens	Bacteria
denovo11451	BA000012	1e-93	Mesorhizobium loti MAFF303099	Bacteria
denovo11456	CP003538	9e-65	Micavibrio aeruginosavorus EPB	Bacteria
denovo11471	FJ868208	3e-140	uncultured gamma proteobacterium	Bacteria
denovo11480	FR695868	2e-36	uncultured Desulfobacterium sp.	Bacteria
denovo11483	AP012547	4e-94	Sulfuritalea hydrogenivorans sk43H	Bacteria
denovo11492	CP002738	9e-78	Methylomonas methanica MC09	Bacteria
denovo11499	CP001339	8e-52	Thioalkalivibrio sulfidophilus HL-EbGr7	Bacteria
denovo11501	CP000488	2e-73	Candidatus Ruthia magnifica str. Cm (Calyptogena magnifica)	Bacteria
denovo1151	CP008896	8e-58	Pseudomonas fluorescens	Bacteria
denovo11512	CP003740	5e-112	Octadecabacter antarcticus 307	Bacteria
denovo11521	CP003989	3e-103	Thioalkalivibrio nitratireducens DSM 14787	Bacteria
denovo1153	CP000362	3e-121	Roseobacter denitrificans OCh 114	Bacteria
denovo11533	CP000830	5e-87	Dinoroseobacter shibae DFL 12	Bacteria
denovo11535	LK391695	2e-73	Pseudomonas pseudoalcaligenes	Bacteria
denovo11549	CP003989	7e-39	Thioalkalivibrio nitratireducens DSM 14787	Bacteria
denovo1155	CP003725	9e-109	Pseudomonas stutzeri DSM 10701	Bacteria
denovo11550	CP003538	1e-82	Micavibrio aeruginosavorus EPB	Bacteria
denovo11552	CP000302	7e-79	Shewanella denitrificans OS217	Bacteria
denovo1156	CP000680	7e-104	Pseudomonas mendocina ymp	Bacteria
denovo11560	AP013068	1e-63	Pseudomonas resinovorans NBRC 106553	Bacteria
denovo1157	CP003989	1e-81	Thioalkalivibrio nitratireducens DSM 14787	Bacteria
denovo11572	CP003845	4e-120	Alteromonas macleodii str. 'Black Sea 11'	Bacteria
denovo11573	CP002914	0.0002	Xanthomonas axonopodis pv. citrumelo F1	Bacteria
denovo11574	CP005990	4e-57	Spiribacter sp. UAH-SP71	Bacteria
denovo11595	AP012547	9e-90	Sulfuritalea hydrogenivorans sk43H	Bacteria
denovo11598	CP000830	2e-112	Dinoroseobacter shibae DFL 12	Bacteria
denovo11599	CP002999	0.092	Muricauda ruestringensis DSM 13258	Bacteria
denovo11647	CP008696	6e-124	Pseudomonas chlororaphis	Bacteria
denovo11657	AP013070	1e-95	Pseudomonas putida NBRC 14164	Bacteria
denovo11665	CP003746	4e-95	Simiduia agarivorans SA1 = DSM 21679	Bacteria
denovo11680	AP010803	1e-95	Sphingobium japonicum UT26S	Bacteria
denovo11682	GU358057	0.002	Clostridia bacterium enrichment culture clone BF	Bacteria
denovo11687	AP012547	1e-94	Sulfuritalea hydrogenivorans sk43H	Bacteria
denovo11688	CP008884	1e-88	Dyella japonica A8	Bacteria
denovo11689	CP002018	7e-111	Ketogulonicigenium vulgare WSH-001	Bacteria
denovo11698	AP013068	3e-64	Pseudomonas resinovorans NBRC 106553	Bacteria
denovo11706	CP006581	7e-117	Mesorhizobium huakuii 7653R	Bacteria
denovo11712	AP013068	3e-65	Pseudomonas resinovorans NBRC 106553	Bacteria
denovo11722	CP003620	7e-10	Crinalium epipsammum PCC 9333	Bacteria
denovo11726	CP000155	1e-93	Hahella chejuensis KCTC 2396	Bacteria
denovo11728	CP005963	4e-76	Spiribacter salinus M19-40	Bacteria
denovo1173	CP007151	4e-76	Marinobacter sp. A3d10	Bacteria
denovo11734	CP001707	2e-78	Kangiella koreensis DSM 16069	Bacteria
denovo11747	LK391695	1e-76	Pseudomonas pseudoalcaligenes	Bacteria
denovo11750	CP001339	5e-68	Thioalkalivibrio sulfidophilus HL-EbGr7	Bacteria
denovo11752	CP003989	1e-100	Thioalkalivibrio nitratireducens DSM 14787	Bacteria
denovo11755	JX456532	2e-09	bacterium symbiont of Theonella swinhoei pTSMAC1	Bacteria
denovo11769	CP000319	8e-72	Nitrobacter hamburgensis X14	Bacteria
denovo1177	CP005996	4e-75	Cycloclasticus zancles 7-ME	Bacteria
denovo11771	CP005388	0.099	Campylobacter jejuni subsp. jejuni CG8421	Bacteria
denovo11790	LK391695	7e-79	Pseudomonas pseudoalcaligenes	Bacteria
denovo11791	CP003742	2e-06	Octadecabacter arcticus 238	Bacteria
denovo1180	CP003725	3e-90	Pseudomonas stutzeri DSM 10701	Bacteria
denovo11826	AE017282	3e-96	Methylococcus capsulatus str. Bath	Bacteria
denovo11836	CP000453	3e-58	Alkalilimnicola ehrlichii MLHE-1	Bacteria
denovo11844	CP003989	2e-73	Thioalkalivibrio nitratireducens DSM 14787	Bacteria
denovo11855	CP007444	2e-60	Dyella jiangningensis	Bacteria
denovo11857	CP000680	4e-69	Pseudomonas mendocina ymp	Bacteria
denovo11860	CP003555	5e-43	Advenella kashmirensis WT001	Bacteria
denovo11864	FJ868208	1e-101	uncultured gamma proteobacterium	Bacteria
denovo11866	CP007444	1e-87	Dyella jiangningensis	Bacteria
denovo11885	CP002738	5e-93	Methylomonas methanica MC09	Bacteria
denovo11889	AP012547	4e-107	Sulfuritalea hydrogenivorans sk43H	Bacteria
denovo1189	CP002349	0.002	Marivirga tractuosa DSM 4126	Bacteria
denovo11899	HE577327	6e-92	Azospirillum brasilense Sp245	Bacteria
denovo11905	CP002606	9e-14	Hippea maritima DSM 10411	Bacteria
denovo11909	CP003734	1e-48	Pseudomonas putida DOT-T1E	Bacteria
denovo11917	CP001339	4e-126	Thioalkalivibrio sulfidophilus HL-EbGr7	Bacteria
denovo1192	CP000680	4e-69	Pseudomonas mendocina ymp	Bacteria
denovo11924	CP003989	7e-85	Thioalkalivibrio nitratireducens DSM 14787	Bacteria
denovo11928	CP003845	6e-61	Alteromonas macleodii str. 'Black Sea 11'	Bacteria
denovo11931	CP002209	2e-61	Ferrimonas balearica DSM 9799	Bacteria
denovo11935	CP002738	3e-77	Methylomonas methanica MC09	Bacteria
denovo11957	CP002526	2e-136	Glaciecola sp. 4H-3-7+YE-5	Bacteria
denovo11975	CP007151	6e-73	Marinobacter sp. A3d10	Bacteria
denovo11976	CP007151	7e-73	Marinobacter sp. A3d10	Bacteria
denovo11977	CP003989	5e-74	Thioalkalivibrio nitratireducens DSM 14787	Bacteria
denovo11982	CP002209	4e-70	Ferrimonas balearica DSM 9799	Bacteria
denovo11987	FO203503	2e-28	Desulfobacula toluolica Tol2	Bacteria
denovo11988	AP012978	1e-138	endosymbiont of unidentified scaly snail isolate Monju	Bacteria
denovo11993	AP012547	1e-82	Sulfuritalea hydrogenivorans sk43H	Bacteria
denovo11995	CP007151	2e-65	Marinobacter sp. A3d10	Bacteria
denovo12001	AP013070	3e-64	Pseudomonas putida NBRC 14164	Bacteria
denovo12011	CP003538	2e-80	Micavibrio aeruginosavorus EPB	Bacteria
denovo12019	AE017282	3e-77	Methylococcus capsulatus str. Bath	Bacteria
denovo12025	CP003274	6e-09	Alistipes finegoldii DSM 17242	Bacteria
denovo12027	CP002972	6e-105	Phaeobacter gallaeciensis 2.10	Bacteria
denovo1204	AP012547	1e-74	Sulfuritalea hydrogenivorans sk43H	Bacteria
denovo12043	CP001339	2e-79	Thioalkalivibrio sulfidophilus HL-EbGr7	Bacteria
denovo12045	CP002157	1e-49	Maribacter sp. HTCC2170	Bacteria
denovo12046	FJ868208	7e-79	uncultured gamma proteobacterium	Bacteria
denovo1205	CP001339	3e-45	Thioalkalivibrio sulfidophilus HL-EbGr7	Bacteria
denovo12114	FR695872	3e-13	uncultured Desulfobacterium sp.	Bacteria
denovo1213	CP002074	0.1	Helicobacter pylori PeCan4	Bacteria
denovo12132	CP006966	6e-40	Phaeobacter gallaeciensis DSM 26640	Bacteria
denovo12134	CP001087	4e-05	Desulfobacterium autotrophicum HRM2	Bacteria
denovo12137	FO538765	1e-43	Magnetospira sp. QH-2	Bacteria
denovo12139	CP000282	4e-95	Saccharophagus degradans 2-40	Bacteria
denovo1214	CP001339	2e-52	Thioalkalivibrio sulfidophilus HL-EbGr7	Bacteria
denovo12155	CP003989	1e-93	Thioalkalivibrio nitratireducens DSM 14787	Bacteria
denovo12167	CP006773	4e-82	Leisingera methylohalidivorans DSM 14336	Bacteria
denovo12187	CP001339	4e-107	Thioalkalivibrio sulfidophilus HL-EbGr7	Bacteria
denovo12192	CP000514	3e-76	Marinobacter aquaeolei VT8	Bacteria
denovo12198	LK391695	4e-69	Pseudomonas pseudoalcaligenes	Bacteria
denovo12209	CP000830	4e-114	Dinoroseobacter shibae DFL 12	Bacteria
denovo12210	AP013068	2e-65	Pseudomonas resinovorans NBRC 106553	Bacteria
denovo1222	AP012547	3e-76	Sulfuritalea hydrogenivorans sk43H	Bacteria
denovo12227	CP001339	2e-55	Thioalkalivibrio sulfidophilus HL-EbGr7	Bacteria
denovo12238	CP003984	6e-99	Candidatus Planktomarina temperata RCA23	Bacteria
denovo12239	CP001707	7e-60	Kangiella koreensis DSM 16069	Bacteria
denovo12242	CP003984	7e-92	Candidatus Planktomarina temperata RCA23	Bacteria
denovo12263	CP004846	1e-62	Alteromonas macleodii str. 'English Channel 615'	Bacteria
denovo12267	CP001043	3e-84	Burkholderia phymatum STM815	Bacteria
denovo12275	FO203512	1e-62	Oleispira antarctica RB-8	Bacteria
denovo12281	CP002447	5e-93	Mesorhizobium ciceri biovar biserrulae WSM1271	Bacteria
denovo12296	HG969192	0.028	Bartonella tribocorum	Bacteria
denovo12298	CP003740	6e-105	Octadecabacter antarcticus 307	Bacteria
denovo12305	CP005963	3e-76	Spiribacter salinus M19-40	Bacteria
denovo12307	FJ868208	6e-80	uncultured gamma proteobacterium	Bacteria
denovo1231	CP003989	4e-94	Thioalkalivibrio nitratireducens DSM 14787	Bacteria
denovo12312	AP013068	3e-81	Pseudomonas resinovorans NBRC 106553	Bacteria
denovo12326	CP005990	8e-65	Spiribacter sp. UAH-SP71	Bacteria
denovo1233	CP000103	3e-90	Nitrosospira multiformis ATCC 25196	Bacteria
denovo12334	CP001751	2e-137	Candidatus Puniceispirillum marinum IMCC1322	Bacteria
denovo12341	CP002382	9e-65	Micavibrio aeruginosavorus ARL-13	Bacteria
denovo12347	CP006650	2e-85	Paracoccus aminophilus JCM 7686	Bacteria
denovo12351	CP002209	3e-63	Ferrimonas balearica DSM 9799	Bacteria
denovo12357	CP003989	2e-79	Thioalkalivibrio nitratireducens DSM 14787	Bacteria
denovo12367	CP001087	1e-05	Desulfobacterium autotrophicum HRM2	Bacteria
denovo12373	CP000680	3e-90	Pseudomonas mendocina ymp	Bacteria
denovo1238	CP003390	1e-37	Methylophaga sp. JAM1	Bacteria
denovo12385	CP003734	2e-65	Pseudomonas putida DOT-T1E	Bacteria
denovo12400	CP002881	9e-78	Pseudomonas stutzeri ATCC 17588 = LMG 11199	Bacteria
denovo12422	FO117579	3e-49	uncultured Flavobacteriia bacterium	Bacteria
denovo12426	CP000084	2e-55	Candidatus Pelagibacter ubique HTCC1062	Bacteria
denovo12436	CP001707	4e-56	Kangiella koreensis DSM 16069	Bacteria
denovo12452	CP000680	3e-70	Pseudomonas mendocina ymp	Bacteria
denovo12454	CP001016	5e-81	Beijerinckia indica subsp. indica ATCC 9039	Bacteria
denovo12455	CP001707	2e-55	Kangiella koreensis DSM 16069	Bacteria
denovo12463	AB780545	6e-74	Shewanella livingstonensis	Bacteria
denovo1247	CP003607	8e-05	Oscillatoria acuminata PCC 6304	Bacteria
denovo12480	CP003538	3e-64	Micavibrio aeruginosavorus EPB	Bacteria
denovo12482	CP001339	4e-100	Thioalkalivibrio sulfidophilus HL-EbGr7	Bacteria
denovo12484	CP003989	1e-95	Thioalkalivibrio nitratireducens DSM 14787	Bacteria
denovo12487	FJ868209	6e-105	uncultured gamma proteobacterium	Bacteria
denovo12523	CP003236	1e-95	Tistrella mobilis KA081020-065	Bacteria
denovo12529	FJ868209	2e-98	uncultured gamma proteobacterium	Bacteria
denovo12554	CP002976	1e-87	Phaeobacter gallaeciensis DSM 17395 = CIP 105210	Bacteria
denovo12555	CP002623	1e-133	Roseobacter litoralis Och 149	Bacteria
denovo12556	LK391695	2e-86	Pseudomonas pseudoalcaligenes	Bacteria
denovo12560	CP001197	0.0002	Desulfovibrio vulgaris str. 'Miyazaki F'	Bacteria
denovo12569	CP007444	1e-62	Dyella jiangningensis	Bacteria
denovo12571	CP002526	5e-68	Glaciecola sp. 4H-3-7+YE-5	Bacteria
denovo12582	AP013068	3e-75	Pseudomonas resinovorans NBRC 106553	Bacteria
denovo12589	CP000083	9e-33	Colwellia psychrerythraea 34H	Bacteria
denovo12592	CP000282	1e-100	Saccharophagus degradans 2-40	Bacteria
denovo12601	CP001339	2e-41	Thioalkalivibrio sulfidophilus HL-EbGr7	Bacteria
denovo12630	CP003349	5e-05	Solitalea canadensis DSM 3403	Bacteria
denovo12634	FR695877	3e-90	uncultured Desulfobacterium sp.	Bacteria
denovo12638	CP007410	1e-100	Pseudomonas brassicacearum	Bacteria
denovo12640	CP005990	2e-80	Spiribacter sp. UAH-SP71	Bacteria
denovo12645	CP000362	8e-78	Roseobacter denitrificans OCh 114	Bacteria
denovo12646	AP012547	7e-85	Sulfuritalea hydrogenivorans sk43H	Bacteria
denovo12649	CP007444	3e-84	Dyella jiangningensis	Bacteria
denovo12650	CP003466	3e-39	Alcanivorax dieselolei B5	Bacteria
denovo12659	CP003989	2e-15	Thioalkalivibrio nitratireducens DSM 14787	Bacteria
denovo12660	CP000804	7e-18	Roseiflexus castenholzii DSM 13941	Bacteria
denovo12677	CP000463	1e-82	Rhodopseudomonas palustris BisA53	Bacteria
denovo12705	CP003725	7e-117	Pseudomonas stutzeri DSM 10701	Bacteria
denovo12711	CP005996	9e-78	Cycloclasticus zancles 7-ME	Bacteria
denovo12720	CP000661	3e-77	Rhodobacter sphaeroides ATCC 17025	Bacteria
denovo12732	FR695877	9e-15	uncultured Desulfobacterium sp.	Bacteria
denovo1275	CP002738	9e-58	Methylomonas methanica MC09	Bacteria
denovo12756	CP007151	2e-72	Marinobacter sp. A3d10	Bacteria
denovo12763	AP014583	2e-66	Winogradskyella sp. PG-2	Bacteria
denovo12768	CP003734	3e-62	Pseudomonas putida DOT-T1E	Bacteria
denovo12787	CP007793	2e-72	Azospirillum brasilense	Bacteria
denovo12791	CP000155	5e-87	Hahella chejuensis KCTC 2396	Bacteria
denovo12795	CP001322	0.002	Desulfatibacillum alkenivorans AK-01	Bacteria
denovo12798	AP012978	9e-84	endosymbiont of unidentified scaly snail isolate Monju	Bacteria
denovo128	FQ311868	3e-71	Azospirillum lipoferum 4B	Bacteria
denovo12806	CP000830	2e-136	Dinoroseobacter shibae DFL 12	Bacteria
denovo12809	CP007569	6e-80	Bradyrhizobium japonicum SEMIA 5079	Bacteria
denovo12826	CU468135	0.96	Erwinia tasmaniensis Et1/99	Bacteria
denovo12831	CP001339	4e-113	Thioalkalivibrio sulfidophilus HL-EbGr7	Bacteria
denovo12846	CP002083	1e-37	Hyphomicrobium denitrificans ATCC 51888	Bacteria
denovo12861	CP000830	3e-90	Dinoroseobacter shibae DFL 12	Bacteria
denovo12864	CP001707	3e-51	Kangiella koreensis DSM 16069	Bacteria
denovo12868	AP009247	2e-55	Candidatus Vesicomyosocius okutanii HA	Bacteria
denovo12873	CP007444	2e-86	Dyella jiangningensis	Bacteria
denovo12908	CP003989	4e-107	Thioalkalivibrio nitratireducens DSM 14787	Bacteria
denovo1291	CP000158	4e-75	Hyphomonas neptunium ATCC 15444	Bacteria
denovo12917	CP003989	3e-102	Thioalkalivibrio nitratireducens DSM 14787	Bacteria
denovo12921	CP002976	1e-127	Phaeobacter gallaeciensis DSM 17395 = CIP 105210	Bacteria
denovo12922	CP003653	9e-72	Stanieria cyanosphaera PCC 7437	Bacteria
denovo12930	CP008849	7e-124	Alteromonas sp. H17	Bacteria
denovo12933	CP001339	6e-118	Thioalkalivibrio sulfidophilus HL-EbGr7	Bacteria
denovo12954	CP000304	3e-83	Pseudomonas stutzeri A1501	Bacteria
denovo12961	CP000362	9e-90	Roseobacter denitrificans OCh 114	Bacteria
denovo12978	CP002914	4e-82	Xanthomonas axonopodis pv. citrumelo F1	Bacteria
denovo12984	CU207211	0.086	Herminiimonas arsenicoxydans	Bacteria
denovo12985	CP002582	4e-12	Clostridium lentocellum DSM 5427	Bacteria
denovo13016	CP001751	4e-44	Candidatus Puniceispirillum marinum IMCC1322	Bacteria
denovo13017	CP003985	2e-07	Desulfocapsa sulfexigens DSM 10523	Bacteria
denovo13031	FJ899959	4e-101	Vesicomya sp. mt-I symbiont	Bacteria
denovo13041	CP001503	0.007	Burkholderia glumae BGR1	Bacteria
denovo13042	AP012978	5e-81	endosymbiont of unidentified scaly snail isolate Monju	Bacteria
denovo13059	CP001339	3e-114	Thioalkalivibrio sulfidophilus HL-EbGr7	Bacteria
denovo13104	CP000680	6e-66	Pseudomonas mendocina ymp	Bacteria
denovo13112	CP001339	3e-64	Thioalkalivibrio sulfidophilus HL-EbGr7	Bacteria
denovo13116	CP000453	2e-84	Alkalilimnicola ehrlichii MLHE-1	Bacteria
denovo13122	CP007444	2e-78	Dyella jiangningensis	Bacteria
denovo13135	CP003915	0.092	Advenella mimigardefordensis DPN7	Bacteria
denovo13141	CP000830	2e-110	Dinoroseobacter shibae DFL 12	Bacteria
denovo13149	CP002620	3e-77	Pseudomonas mendocina NK-01	Bacteria
denovo13155	CP000362	2e-91	Roseobacter denitrificans OCh 114	Bacteria
denovo13163	CP008884	2e-99	Dyella japonica A8	Bacteria
denovo13172	CP003989	3e-108	Thioalkalivibrio nitratireducens DSM 14787	Bacteria
denovo13203	CP007151	8e-78	Marinobacter sp. A3d10	Bacteria
denovo13204	CP003989	3e-84	Thioalkalivibrio nitratireducens DSM 14787	Bacteria
denovo13209	CP002209	1e-68	Ferrimonas balearica DSM 9799	Bacteria
denovo13214	CP007444	2e-74	Dyella jiangningensis	Bacteria
denovo13222	AP012978	8e-135	endosymbiont of unidentified scaly snail isolate Monju	Bacteria
denovo1323	CP001339	3e-51	Thioalkalivibrio sulfidophilus HL-EbGr7	Bacteria
denovo13242	CP000282	3e-128	Saccharophagus degradans 2-40	Bacteria
denovo13245	CP002623	4e-127	Roseobacter litoralis Och 149	Bacteria
denovo13253	AP012978	6e-60	endosymbiont of unidentified scaly snail isolate Monju	Bacteria
denovo13260	CP007151	2e-98	Marinobacter sp. A3d10	Bacteria
denovo13266	CP000514	8e-84	Marinobacter aquaeolei VT8	Bacteria
denovo13272	HF559394	0.029	Mycoplasma cynos C142	Bacteria
denovo13285	CP003989	3e-84	Thioalkalivibrio nitratireducens DSM 14787	Bacteria
denovo13289	CP000514	3e-76	Marinobacter aquaeolei VT8	Bacteria
denovo13309	CP000930	4e-25	Heliobacterium modesticaldum Ice1	Bacteria
denovo13313	AP012978	2e-64	endosymbiont of unidentified scaly snail isolate Monju	Bacteria
denovo13320	AP012547	4e-101	Sulfuritalea hydrogenivorans sk43H	Bacteria
denovo13321	CP000680	1e-75	Pseudomonas mendocina ymp	Bacteria
denovo13335	CP002620	8e-72	Pseudomonas mendocina NK-01	Bacteria
denovo1334	AP012273	3e-08	gamma proteobacterium Hiromi1	Bacteria
denovo13340	CP000830	3e-115	Dinoroseobacter shibae DFL 12	Bacteria
denovo13368	CP003734	4e-68	Pseudomonas putida DOT-T1E	Bacteria
denovo13371	AP012492	0.21	Helicobacter cinaedi ATCC BAA-847	Bacteria
denovo13389	CP002622	7e-104	Pseudomonas stutzeri DSM 4166	Bacteria
denovo13391	CP000362	4e-95	Roseobacter denitrificans OCh 114	Bacteria
denovo13406	CP006966	1e-139	Phaeobacter gallaeciensis DSM 26640	Bacteria
denovo13415	CP001707	4e-69	Kangiella koreensis DSM 16069	Bacteria
denovo1342	CP003538	2e-54	Micavibrio aeruginosavorus EPB	Bacteria
denovo13420	CP001111	2e-98	Stenotrophomonas maltophilia R551-3	Bacteria
denovo13433	CP001339	5e-40	Thioalkalivibrio sulfidophilus HL-EbGr7	Bacteria
denovo13441	CP003774	1.1	Burkholderia cepacia GG4	Bacteria
denovo13454	CP002287	8e-52	Achromobacter xylosoxidans A8	Bacteria
denovo13455	CP003989	1e-75	Thioalkalivibrio nitratireducens DSM 14787	Bacteria
denovo13488	CP005996	5e-87	Cycloclasticus zancles 7-ME	Bacteria
denovo13496	CP000680	2e-80	Pseudomonas mendocina ymp	Bacteria
denovo1350	CP001339	2e-35	Thioalkalivibrio sulfidophilus HL-EbGr7	Bacteria
denovo13508	CP000514	7e-65	Marinobacter aquaeolei VT8	Bacteria
denovo13515	EF106972	7e-42	uncultured marine Nitrospinaceae bacterium	Bacteria
denovo13517	AP012978	1e-53	endosymbiont of unidentified scaly snail isolate Monju	Bacteria
denovo13520	CP003549	2e-77	Rivularia sp. PCC 7116	Bacteria
denovo13525	CP005996	1e-47	Cycloclasticus zancles 7-ME	Bacteria
denovo13528	AP012273	2e-17	gamma proteobacterium Hiromi1	Bacteria
denovo13532	AB780545	1e-63	Shewanella livingstonensis	Bacteria
denovo13535	AP013068	9e-65	Pseudomonas resinovorans NBRC 106553	Bacteria
denovo13545	CP002623	2e-118	Roseobacter litoralis Och 149	Bacteria
denovo13555	CP000680	1e-82	Pseudomonas mendocina ymp	Bacteria
denovo13592	AP012978	9e-71	endosymbiont of unidentified scaly snail isolate Monju	Bacteria
denovo13603	CP001349	9e-39	Methylobacterium nodulans ORS 2060	Bacteria
denovo13613	CP000859	2e-28	Desulfococcus oleovorans Hxd3	Bacteria
denovo13619	FQ311868	8e-72	Azospirillum lipoferum 4B	Bacteria
denovo13628	CP007509	1e-62	Pseudomonas stutzeri	Bacteria
denovo13636	CP000362	8e-91	Roseobacter denitrificans OCh 114	Bacteria
denovo13639	CP003989	9e-65	Thioalkalivibrio nitratireducens DSM 14787	Bacteria
denovo1364	BA000040	0.32	Bradyrhizobium diazoefficiens USDA 110	Bacteria
denovo13661	CP002568	2e-80	Polymorphum gilvum SL003B-26A1	Bacteria
denovo1367	CP007151	1e-55	Marinobacter sp. A3d10	Bacteria
denovo13671	AP012273	8e-15	gamma proteobacterium Hiromi1	Bacteria
denovo13681	FJ868209	2e-92	uncultured gamma proteobacterium	Bacteria
denovo13683	CP007627	0.026	Flavobacterium psychrophilum	Bacteria
denovo13684	CP001339	1e-40	Thioalkalivibrio sulfidophilus HL-EbGr7	Bacteria
denovo13685	CP001339	1e-74	Thioalkalivibrio sulfidophilus HL-EbGr7	Bacteria
denovo1369	CP001339	1e-61	Thioalkalivibrio sulfidophilus HL-EbGr7	Bacteria
denovo13697	CP003734	8e-50	Pseudomonas putida DOT-T1E	Bacteria
denovo1370	CP000362	6e-93	Roseobacter denitrificans OCh 114	Bacteria
denovo13708	CP008696	4e-87	Pseudomonas chlororaphis	Bacteria
denovo13715	CP002738	5e-62	Methylomonas methanica MC09	Bacteria
denovo13719	CP001276	1e-07	Thermomicrobium roseum DSM 5159	Bacteria
denovo13730	AP012547	2e-91	Sulfuritalea hydrogenivorans sk43H	Bacteria
denovo13738	CP001339	6e-42	Thioalkalivibrio sulfidophilus HL-EbGr7	Bacteria
denovo13744	CP002972	3e-90	Phaeobacter gallaeciensis 2.10	Bacteria
denovo13747	FJ868209	8e-97	uncultured gamma proteobacterium	Bacteria
denovo13748	CP003549	0.0006	Rivularia sp. PCC 7116	Bacteria
denovo13752	CP001769	1e-25	Spirosoma linguale DSM 74	Bacteria
denovo13756	CP002584	1e-26	Sphingobacterium sp. 21	Bacteria
denovo13791	AP013068	3e-74	Pseudomonas resinovorans NBRC 106553	Bacteria
denovo13797	CP003740	5e-24	Octadecabacter antarcticus 307	Bacteria
denovo13801	CP002620	4e-69	Pseudomonas mendocina NK-01	Bacteria
denovo13802	CP001707	6e-86	Kangiella koreensis DSM 16069	Bacteria
denovo13807	CP006835	6e-42	Mycobacterium kansasii ATCC 12478	Bacteria
denovo13817	KF521921	1e-94	Adipicola sp. JDF2008 gill symbiont	Bacteria
denovo13846	CP002972	3e-102	Phaeobacter gallaeciensis 2.10	Bacteria
denovo13848	CP003284	4e-64	Anabaena sp. 90	Bacteria
denovo13854	CP003734	3e-70	Pseudomonas putida DOT-T1E	Bacteria
denovo13863	CP003989	9e-84	Thioalkalivibrio nitratireducens DSM 14787	Bacteria
denovo1387	AP010946	9e-78	Azospirillum sp. B510	Bacteria
denovo13887	FJ868208	1e-69	uncultured gamma proteobacterium	Bacteria
denovo13917	CT573326	8e-104	Pseudomonas entomophila L48	Bacteria
denovo13918	CP000304	3e-102	Pseudomonas stutzeri A1501	Bacteria
denovo13934	AP012206	4e-63	Bradyrhizobium japonicum USDA 6	Bacteria
denovo13980	HG966617	3e-64	bacterium Ec32	Bacteria
denovo13987	CP001339	3e-45	Thioalkalivibrio sulfidophilus HL-EbGr7	Bacteria
denovo13990	FJ868209	4e-139	uncultured gamma proteobacterium	Bacteria
denovo13998	CP004870	0.34	Bacillus thuringiensis serovar kurstaki str. HD-1	Bacteria
denovo14015	CP001339	1e-50	Thioalkalivibrio sulfidophilus HL-EbGr7	Bacteria
denovo14020	CP001339	3e-147	Thioalkalivibrio sulfidophilus HL-EbGr7	Bacteria
denovo14031	CP001089	0.0006	Geobacter lovleyi SZ	Bacteria
denovo14054	CP001087	5e-37	Desulfobacterium autotrophicum HRM2	Bacteria
denovo14064	CP003190	4e-101	Pseudomonas protegens CHA0	Bacteria
denovo14068	CP001896	8e-28	Allochromatium vinosum DSM 180	Bacteria
denovo14078	CP002568	2e-148	Polymorphum gilvum SL003B-26A1	Bacteria
denovo14091	CP000103	3e-96	Nitrosospira multiformis ATCC 25196	Bacteria
denovo14092	CP001707	2e-78	Kangiella koreensis DSM 16069	Bacteria
denovo14110	AP012978	6e-80	endosymbiont of unidentified scaly snail isolate Monju	Bacteria
denovo14124	CP003989	2e-97	Thioalkalivibrio nitratireducens DSM 14787	Bacteria
denovo14128	CP000680	7e-72	Pseudomonas mendocina ymp	Bacteria
denovo14140	CP003746	2e-99	Simiduia agarivorans SA1 = DSM 21679	Bacteria
denovo14154	LK391695	2e-67	Pseudomonas pseudoalcaligenes	Bacteria
denovo14158	CP006912	9e-08	Hyphomicrobium nitrativorans NL23	Bacteria
denovo14160	CP003538	1e-63	Micavibrio aeruginosavorus EPB	Bacteria
denovo14167	CP001654	0.0002	Dickeya dadantii Ech703	Bacteria
denovo14178	CP000109	3e-45	Thiomicrospira crunogena XCL-2	Bacteria
denovo14181	CP000830	1e-81	Dinoroseobacter shibae DFL 12	Bacteria
denovo14188	CP005990	1e-69	Spiribacter sp. UAH-SP71	Bacteria
denovo14189	AP012547	2e-97	Sulfuritalea hydrogenivorans sk43H	Bacteria
denovo14191	CP006966	2e-106	Phaeobacter gallaeciensis DSM 26640	Bacteria
denovo14194	CP000494	2e-47	Bradyrhizobium sp. BTAi1	Bacteria
denovo14195	AP013068	1e-67	Pseudomonas resinovorans NBRC 106553	Bacteria
denovo14198	CP002511	5e-62	Candidatus Pelagibacter sp. IMCC9063	Bacteria
denovo14199	CP002972	2e-111	Phaeobacter gallaeciensis 2.10	Bacteria
denovo1424	CP002972	2e-111	Phaeobacter gallaeciensis 2.10	Bacteria
denovo14242	CP002623	1e-145	Roseobacter litoralis Och 149	Bacteria
denovo14246	CP002552	2e-136	Nitrosomonas sp. AL212	Bacteria
denovo14250	CP001096	2e-92	Rhodopseudomonas palustris TIE-1	Bacteria
denovo14261	CP003466	3e-51	Alcanivorax dieselolei B5	Bacteria
denovo14266	CP000285	2e-09	Chromohalobacter salexigens DSM 3043	Bacteria
denovo14274	CP002546	0.027	Planctomyces brasiliensis DSM 5305	Bacteria
denovo14275	CP002157	4e-119	Maribacter sp. HTCC2170	Bacteria
denovo14293	CP005963	2e-79	Spiribacter salinus M19-40	Bacteria
denovo14307	LK391695	5e-81	Pseudomonas pseudoalcaligenes	Bacteria
denovo14310	FP929043	0.003	Eubacterium rectale M104/1	Bacteria
denovo14318	CP003255	2e-15	Thermobacillus composti KWC4	Bacteria
denovo14326	CP002770	6e-23	Desulfotomaculum kuznetsovii DSM 6115	Bacteria
denovo14334	CP000304	3e-89	Pseudomonas stutzeri A1501	Bacteria
denovo14357	AP012978	2e-86	endosymbiont of unidentified scaly snail isolate Monju	Bacteria
denovo14363	CP002738	6e-59	Methylomonas methanica MC09	Bacteria
denovo1437	CP000362	4e-133	Roseobacter denitrificans OCh 114	Bacteria
denovo14381	AP012978	6e-74	endosymbiont of unidentified scaly snail isolate Monju	Bacteria
denovo14382	CP001339	8e-59	Thioalkalivibrio sulfidophilus HL-EbGr7	Bacteria
denovo14398	CP000304	2e-72	Pseudomonas stutzeri A1501	Bacteria
denovo14399	HE798556	1e-88	Stenotrophomonas maltophilia D457	Bacteria
denovo144	CP003989	1e-75	Thioalkalivibrio nitratireducens DSM 14787	Bacteria
denovo1440	CP002876	3e-90	Nitrosomonas sp. Is79A3	Bacteria
denovo14403	CP003989	5e-99	Thioalkalivibrio nitratireducens DSM 14787	Bacteria
denovo14419	AE017282	4e-62	Methylococcus capsulatus str. Bath	Bacteria
denovo14440	LK391695	3e-84	Pseudomonas pseudoalcaligenes	Bacteria
denovo1445	CP007151	5e-60	Marinobacter sp. A3d10	Bacteria
denovo14452	CP007151	1e-53	Marinobacter sp. A3d10	Bacteria
denovo14460	CP007481	4e-44	Neorickettsia helminthoeca str. Oregon	Bacteria
denovo14464	CP006931	4e-88	Pseudomonas aeruginosa SCV20265	Bacteria
denovo14467	BX572595	4e-69	Rhodopseudomonas palustris CGA009	Bacteria
denovo14470	CP001681	0.089	Pedobacter heparinus DSM 2366	Bacteria
denovo14480	LK391695	1e-69	Pseudomonas pseudoalcaligenes	Bacteria
denovo14486	CP000494	7e-98	Bradyrhizobium sp. BTAi1	Bacteria
denovo14492	KF521924	8e-66	deep-sea mussel NZ3 thioautotrophic gill symbiont	Bacteria
denovo14504	CP002976	2e-104	Phaeobacter gallaeciensis DSM 17395 = CIP 105210	Bacteria
denovo14505	CP000155	1e-100	Hahella chejuensis KCTC 2396	Bacteria
denovo14506	AP013068	4e-87	Pseudomonas resinovorans NBRC 106553	Bacteria
denovo14511	CP001614	3e-97	Teredinibacter turnerae T7901	Bacteria
denovo14521	CP003242	1e-18	Vibrio sp. EJY3	Bacteria
denovo14525	CP003740	5e-113	Octadecabacter antarcticus 307	Bacteria
denovo14541	CP006966	2e-124	Phaeobacter gallaeciensis DSM 26640	Bacteria
denovo14575	CP000514	3e-76	Marinobacter aquaeolei VT8	Bacteria
denovo14576	FJ868208	2e-143	uncultured gamma proteobacterium	Bacteria
denovo14578	LK391695	3e-70	Pseudomonas pseudoalcaligenes	Bacteria
denovo14579	CP003989	3e-77	Thioalkalivibrio nitratireducens DSM 14787	Bacteria
denovo14580	CP000943	2e-08	Methylobacterium sp. 4-46	Bacteria
denovo14585	CP000859	3e-32	Desulfococcus oleovorans Hxd3	Bacteria
denovo1459	CP000774	1e-101	Parvibaculum lavamentivorans DS-1	Bacteria
denovo14595	AP012547	2e-85	Sulfuritalea hydrogenivorans sk43H	Bacteria
denovo14604	CP003989	2e-67	Thioalkalivibrio nitratireducens DSM 14787	Bacteria
denovo14609	CP001339	2e-67	Thioalkalivibrio sulfidophilus HL-EbGr7	Bacteria
denovo14611	FJ899956	4e-57	Vesicomya cordata gill symbiont	Bacteria
denovo14614	AP012978	2e-52	endosymbiont of unidentified scaly snail isolate Monju	Bacteria
denovo14622	CP007794	0.007	Azospirillum brasilense	Bacteria
denovo14632	AP013068	4e-61	Pseudomonas resinovorans NBRC 106553	Bacteria
denovo14641	LK391695	3e-77	Pseudomonas pseudoalcaligenes	Bacteria
denovo14667	CP005990	2e-78	Spiribacter sp. UAH-SP71	Bacteria
denovo14677	CP000830	4e-107	Dinoroseobacter shibae DFL 12	Bacteria
denovo1468	CP005996	1e-76	Cycloclasticus zancles 7-ME	Bacteria
denovo14689	CP002876	4e-107	Nitrosomonas sp. Is79A3	Bacteria
denovo1469	CP003989	5e-93	Thioalkalivibrio nitratireducens DSM 14787	Bacteria
denovo14702	CP003538	5e-75	Micavibrio aeruginosavorus EPB	Bacteria
denovo14705	CP005990	2e-74	Spiribacter sp. UAH-SP71	Bacteria
denovo14715	CP004848	2e-55	Alteromonas macleodii str. 'Aegean Sea MED64'	Bacteria
denovo14725	FJ868209	2e-136	uncultured gamma proteobacterium	Bacteria
denovo14737	CP005976	4e-63	Pseudomonas putida H8234	Bacteria
denovo14741	HE577327	6e-111	Azospirillum brasilense Sp245	Bacteria
denovo14755	CP002157	2e-99	Maribacter sp. HTCC2170	Bacteria
denovo14769	CP003740	2e-99	Octadecabacter antarcticus 307	Bacteria
denovo14773	CP003989	6e-85	Thioalkalivibrio nitratireducens DSM 14787	Bacteria
denovo14788	CP006966	2e-124	Phaeobacter gallaeciensis DSM 26640	Bacteria
denovo14790	CP000453	1e-54	Alkalilimnicola ehrlichii MLHE-1	Bacteria
denovo14796	CP000362	3e-57	Roseobacter denitrificans OCh 114	Bacteria
denovo14804	CP006966	6e-09	Phaeobacter gallaeciensis DSM 26640	Bacteria
denovo14807	CP003989	9e-84	Thioalkalivibrio nitratireducens DSM 14787	Bacteria
denovo14813	FJ868209	6e-99	uncultured gamma proteobacterium	Bacteria
denovo14819	FO538765	3e-13	Magnetospira sp. QH-2	Bacteria
denovo14835	CP003989	5e-75	Thioalkalivibrio nitratireducens DSM 14787	Bacteria
denovo14842	CP000362	4e-139	Roseobacter denitrificans OCh 114	Bacteria
denovo14859	CP000859	0.027	Desulfococcus oleovorans Hxd3	Bacteria
denovo14867	CP007012	7e-79	Pseudomonas sp. FGI182	Bacteria
denovo14871	CP001339	3e-64	Thioalkalivibrio sulfidophilus HL-EbGr7	Bacteria
denovo14873	CP003274	1.1	Alistipes finegoldii DSM 17242	Bacteria
denovo14881	CP002568	7e-53	Polymorphum gilvum SL003B-26A1	Bacteria
denovo14932	AP013068	4e-62	Pseudomonas resinovorans NBRC 106553	Bacteria
denovo14937	CP001707	4e-88	Kangiella koreensis DSM 16069	Bacteria
denovo14942	FR695864	5e-49	uncultured Desulfobacterium sp.	Bacteria
denovo1495	CP002738	2e-61	Methylomonas methanica MC09	Bacteria
denovo14953	CP000514	3e-76	Marinobacter aquaeolei VT8	Bacteria
denovo14956	CP007597	3e-71	Stenotrophomonas rhizophila	Bacteria
denovo14973	CP001339	4e-35	Thioalkalivibrio sulfidophilus HL-EbGr7	Bacteria
denovo14989	CP001707	8e-104	Kangiella koreensis DSM 16069	Bacteria
denovo14991	CP003837	2e-137	Glaciecola psychrophila 170	Bacteria
denovo14993	CP003734	2e-66	Pseudomonas putida DOT-T1E	Bacteria
denovo14994	AP012547	8e-97	Sulfuritalea hydrogenivorans sk43H	Bacteria
denovo14998	CP002297	4e-24	Desulfovibrio vulgaris RCH1	Bacteria
denovo15	CP000680	1e-69	Pseudomonas mendocina ymp	Bacteria
denovo15001	CP002972	9e-103	Phaeobacter gallaeciensis 2.10	Bacteria
denovo15003	CP002976	1e-127	Phaeobacter gallaeciensis DSM 17395 = CIP 105210	Bacteria
denovo1501	FJ868208	3e-77	uncultured gamma proteobacterium	Bacteria
denovo15022	CP006966	1e-114	Phaeobacter gallaeciensis DSM 26640	Bacteria
denovo15026	CP001707	4e-63	Kangiella koreensis DSM 16069	Bacteria
denovo15037	CP003734	2e-73	Pseudomonas putida DOT-T1E	Bacteria
denovo15040	CP002209	1e-68	Ferrimonas balearica DSM 9799	Bacteria
denovo15045	FP885897	2e-08	Ralstonia solanacearum CFBP2957	Bacteria
denovo15048	CP003740	3e-96	Octadecabacter antarcticus 307	Bacteria
denovo15090	CP000514	1e-54	Marinobacter aquaeolei VT8	Bacteria
denovo15093	CP007444	8e-72	Dyella jiangningensis	Bacteria
denovo15095	CP001339	2e-60	Thioalkalivibrio sulfidophilus HL-EbGr7	Bacteria
denovo15109	FJ899956	3e-64	Vesicomya cordata gill symbiont	Bacteria
denovo1511	CP002623	2e-78	Roseobacter litoralis Och 149	Bacteria
denovo15120	CP000830	1e-94	Dinoroseobacter shibae DFL 12	Bacteria
denovo15122	CP003989	1e-75	Thioalkalivibrio nitratireducens DSM 14787	Bacteria
denovo15124	CP001339	1e-120	Thioalkalivibrio sulfidophilus HL-EbGr7	Bacteria
denovo15144	CP002738	1e-82	Methylomonas methanica MC09	Bacteria
denovo15180	CP007152	6e-61	Marinobacter sp. R9SW1	Bacteria
denovo1519	CP003740	7e-104	Octadecabacter antarcticus 307	Bacteria
denovo152	CP001649	0.027	Desulfovibrio salexigens DSM 2638	Bacteria
denovo15202	AP014622	2e-66	Pseudomonas aeruginosa	Bacteria
denovo15214	CP000390	1e-95	Chelativorans sp. BNC1	Bacteria
denovo15215	AP012547	2e-91	Sulfuritalea hydrogenivorans sk43H	Bacteria
denovo15219	CP001339	2e-54	Thioalkalivibrio sulfidophilus HL-EbGr7	Bacteria
denovo15235	CP003985	4e-05	Desulfocapsa sulfexigens DSM 10523	Bacteria
denovo15241	CP003236	4e-06	Tistrella mobilis KA081020-065	Bacteria
denovo15255	CP006875	0.002	Francisella noatunensis subsp. orientalis LADL--07-285A	Bacteria
denovo15256	CP007151	1e-88	Marinobacter sp. A3d10	Bacteria
denovo1528	AP012978	8e-72	endosymbiont of unidentified scaly snail isolate Monju	Bacteria
denovo15294	FO082060	3e-58	Methylomicrobium alcaliphilum 20Z	Bacteria
denovo15296	CP003147	8e-47	Pseudovibrio sp. FO-BEG1	Bacteria
denovo15302	HE577327	2e-47	Azospirillum brasilense Sp245	Bacteria
denovo15311	CP001339	3e-40	Thioalkalivibrio sulfidophilus HL-EbGr7	Bacteria
denovo15313	CP003734	2e-44	Pseudomonas putida DOT-T1E	Bacteria
denovo15314	CP001339	3e-44	Thioalkalivibrio sulfidophilus HL-EbGr7	Bacteria
denovo15321	AP012547	1e-95	Sulfuritalea hydrogenivorans sk43H	Bacteria
denovo15330	CP007151	2e-86	Marinobacter sp. A3d10	Bacteria
denovo15334	CP003989	3e-90	Thioalkalivibrio nitratireducens DSM 14787	Bacteria
denovo15335	CP005963	9e-27	Spiribacter salinus M19-40	Bacteria
denovo15336	AP013070	1e-82	Pseudomonas putida NBRC 14164	Bacteria
denovo15339	CP005990	3e-102	Spiribacter sp. UAH-SP71	Bacteria
denovo15345	CP003989	5e-99	Thioalkalivibrio nitratireducens DSM 14787	Bacteria
denovo15356	CP003989	3e-96	Thioalkalivibrio nitratireducens DSM 14787	Bacteria
denovo15365	CP000949	6e-61	Pseudomonas putida W619	Bacteria
denovo15390	CP006966	3e-103	Phaeobacter gallaeciensis DSM 26640	Bacteria
denovo1540	CP005990	1e-10	Spiribacter sp. UAH-SP71	Bacteria
denovo15404	CP001707	7e-60	Kangiella koreensis DSM 16069	Bacteria
denovo15424	CP002039	0.007	Herbaspirillum seropedicae SmR1	Bacteria
denovo15425	CP002903	3e-64	Spirochaeta thermophila DSM 6578	Bacteria
denovo15426	CP003989	1e-88	Thioalkalivibrio nitratireducens DSM 14787	Bacteria
denovo15434	CP000252	3e-19	Syntrophus aciditrophicus SB	Bacteria
denovo15437	AP012978	2e-60	endosymbiont of unidentified scaly snail isolate Monju	Bacteria
denovo15458	CP003171	4e-50	Oceanimonas sp. GK1	Bacteria
denovo15462	FO203503	3e-08	Desulfobacula toluolica Tol2	Bacteria
denovo15463	CP000830	3e-109	Dinoroseobacter shibae DFL 12	Bacteria
denovo15464	AP012603	3e-38	Bradyrhizobium oligotrophicum S58	Bacteria
denovo15470	CP003746	4e-63	Simiduia agarivorans SA1 = DSM 21679	Bacteria
denovo15478	CP005080	0.33	Streptomyces fulvissimus DSM 40593	Bacteria
denovo1548	CP001339	1e-119	Thioalkalivibrio sulfidophilus HL-EbGr7	Bacteria
denovo15497	FJ868209	2e-41	uncultured gamma proteobacterium	Bacteria
denovo15508	AP011720	2e-21	uncultured candidate division OP1 bacterium	Bacteria
denovo1553	FJ899953	8e-59	Vesicomya sp. endosymbiont	Bacteria
denovo15534	CP003538	2e-42	Micavibrio aeruginosavorus EPB	Bacteria
denovo15538	AP012547	7e-92	Sulfuritalea hydrogenivorans sk43H	Bacteria
denovo15545	CP001905	3e-71	Thioalkalivibrio sp. K90mix	Bacteria
denovo15546	CP000680	5e-93	Pseudomonas mendocina ymp	Bacteria
denovo15549	CP002620	3e-55	Pseudomonas mendocina NK-01	Bacteria
denovo15551	CP002972	9e-97	Phaeobacter gallaeciensis 2.10	Bacteria
denovo15572	CP002080	5e-05	Acinetobacter oleivorans DR1	Bacteria
denovo15577	CP001339	4e-62	Thioalkalivibrio sulfidophilus HL-EbGr7	Bacteria
denovo15584	CP001339	1e-54	Thioalkalivibrio sulfidophilus HL-EbGr7	Bacteria
denovo15585	CP003947	1e-19	Cyanobacterium aponinum PCC 10605	Bacteria
denovo15591	CP002972	2e-116	Phaeobacter gallaeciensis 2.10	Bacteria
denovo15594	FJ868209	3e-71	uncultured gamma proteobacterium	Bacteria
denovo15601	AP012978	7e-92	endosymbiont of unidentified scaly snail isolate Monju	Bacteria
denovo15606	FJ868209	2e-98	uncultured gamma proteobacterium	Bacteria
denovo15614	CP002738	3e-89	Methylomonas methanica MC09	Bacteria
denovo15616	CP002157	1e-83	Maribacter sp. HTCC2170	Bacteria
denovo15617	CP000830	4e-101	Dinoroseobacter shibae DFL 12	Bacteria
denovo15619	CP000155	9e-90	Hahella chejuensis KCTC 2396	Bacteria
denovo15620	CP003989	3e-83	Thioalkalivibrio nitratireducens DSM 14787	Bacteria
denovo15624	CP000157	1e-108	Erythrobacter litoralis HTCC2594	Bacteria
denovo15626	CP002623	1e-74	Roseobacter litoralis Och 149	Bacteria
denovo15633	FJ868209	3e-96	uncultured gamma proteobacterium	Bacteria
denovo15636	AE017282	7e-79	Methylococcus capsulatus str. Bath	Bacteria
denovo15641	CP000680	7e-73	Pseudomonas mendocina ymp	Bacteria
denovo15656	CP007151	1e-62	Marinobacter sp. A3d10	Bacteria
denovo15658	CP000613	4e-69	Rhodospirillum centenum SW	Bacteria
denovo1566	CP003355	3e-06	Paenibacillus larvae subsp. larvae DSM 25430	Bacteria
denovo15663	CP001100	0.0004	Chloroherpeton thalassium ATCC 35110	Bacteria
denovo15667	FJ868209	4e-113	uncultured gamma proteobacterium	Bacteria
denovo15685	CR628336	8e-66	Legionella pneumophila str. Paris	Bacteria
denovo15692	CP003563	9e-08	Sinorhizobium fredii USDA 257	Bacteria
denovo15709	CP002046	0.32	Croceibacter atlanticus HTCC2559	Bacteria
denovo15729	CP001100	3e-14	Chloroherpeton thalassium ATCC 35110	Bacteria
denovo15737	CP001339	2e-148	Thioalkalivibrio sulfidophilus HL-EbGr7	Bacteria
denovo15739	CP004870	0.028	Bacillus thuringiensis serovar kurstaki str. HD-1	Bacteria
denovo15747	AP012547	3e-83	Sulfuritalea hydrogenivorans sk43H	Bacteria
denovo15749	AP009247	9e-59	Candidatus Vesicomyosocius okutanii HA	Bacteria
denovo15754	CP000680	4e-61	Pseudomonas mendocina ymp	Bacteria
denovo15757	CP002738	2e-105	Methylomonas methanica MC09	Bacteria
denovo15771	HE577327	9e-71	Azospirillum brasilense Sp245	Bacteria
denovo15783	CP001707	1e-89	Kangiella koreensis DSM 16069	Bacteria
denovo15785	CP002738	2e-59	Methylomonas methanica MC09	Bacteria
denovo15799	CP000830	2e-110	Dinoroseobacter shibae DFL 12	Bacteria
denovo158	CP007637	1e-102	Pseudomonas simiae	Bacteria
denovo15806	CP002046	8e-09	Croceibacter atlanticus HTCC2559	Bacteria
denovo15809	CP000155	4e-95	Hahella chejuensis KCTC 2396	Bacteria
denovo15823	CR522870	1e-12	Desulfotalea psychrophila LSv54	Bacteria
denovo15825	FO203363	1e-50	Marinobacter hydrocarbonoclasticus ATCC 49840	Bacteria
denovo15828	CP001341	0.99	Arthrobacter chlorophenolicus A6	Bacteria
denovo1584	CP000680	1e-76	Pseudomonas mendocina ymp	Bacteria
denovo15846	AP012547	7e-85	Sulfuritalea hydrogenivorans sk43H	Bacteria
denovo15848	CP000362	3e-69	Roseobacter denitrificans OCh 114	Bacteria
denovo15854	LK391695	2e-79	Pseudomonas pseudoalcaligenes	Bacteria
denovo15867	CP000127	7e-14	Nitrosococcus oceani ATCC 19707	Bacteria
denovo1587	CP002568	5e-93	Polymorphum gilvum SL003B-26A1	Bacteria
denovo15880	AP012547	6e-105	Sulfuritalea hydrogenivorans sk43H	Bacteria
denovo15881	CP002738	6e-92	Methylomonas methanica MC09	Bacteria
denovo15887	CP002623	1e-152	Roseobacter litoralis Och 149	Bacteria
denovo15890	CP005990	6e-99	Spiribacter sp. UAH-SP71	Bacteria
denovo15896	FN650140	3e-65	Legionella longbeachae NSW150	Bacteria
denovo15905	CP001707	3e-71	Kangiella koreensis DSM 16069	Bacteria
denovo15907	CP000830	2e-117	Dinoroseobacter shibae DFL 12	Bacteria
denovo15908	LK391695	4e-69	Pseudomonas pseudoalcaligenes	Bacteria
denovo15914	CP001339	1e-95	Thioalkalivibrio sulfidophilus HL-EbGr7	Bacteria
denovo15949	CP006912	8e-66	Hyphomicrobium nitrativorans NL23	Bacteria
denovo15953	CP000758	7e-98	Ochrobactrum anthropi ATCC 49188	Bacteria
denovo15965	CP003242	3e-46	Vibrio sp. EJY3	Bacteria
denovo15982	CP003989	5e-87	Thioalkalivibrio nitratireducens DSM 14787	Bacteria
denovo15986	CP008849	0.7	Alteromonas sp. H17	Bacteria
denovo16001	CP001339	1e-126	Thioalkalivibrio sulfidophilus HL-EbGr7	Bacteria
denovo16011	CP002976	2e-124	Phaeobacter gallaeciensis DSM 17395 = CIP 105210	Bacteria
denovo16034	CP005996	8e-78	Cycloclasticus zancles 7-ME	Bacteria
denovo16046	CP000304	4e-76	Pseudomonas stutzeri A1501	Bacteria
denovo16062	CP002157	2e-60	Maribacter sp. HTCC2170	Bacteria
denovo16069	CP003360	4e-30	Desulfomonile tiedjei DSM 6799	Bacteria
denovo16077	AP012029	2e-23	Anaerolinea thermophila UNI-1	Bacteria
denovo16079	CP002972	1e-107	Phaeobacter gallaeciensis 2.10	Bacteria
denovo16084	CP002568	3e-39	Polymorphum gilvum SL003B-26A1	Bacteria
denovo16088	CP003989	9e-84	Thioalkalivibrio nitratireducens DSM 14787	Bacteria
denovo16111	FJ868209	4e-56	uncultured gamma proteobacterium	Bacteria
denovo16116	CP003538	3e-71	Micavibrio aeruginosavorus EPB	Bacteria
denovo16117	CP002209	1e-68	Ferrimonas balearica DSM 9799	Bacteria
denovo16129	CP001339	1e-49	Thioalkalivibrio sulfidophilus HL-EbGr7	Bacteria
denovo16138	CP001339	1e-42	Thioalkalivibrio sulfidophilus HL-EbGr7	Bacteria
denovo16146	AP014622	1e-63	Pseudomonas aeruginosa	Bacteria
denovo16163	AP012978	2e-74	endosymbiont of unidentified scaly snail isolate Monju	Bacteria
denovo16168	CP002623	3e-122	Roseobacter litoralis Och 149	Bacteria
denovo16171	CP001339	2e-47	Thioalkalivibrio sulfidophilus HL-EbGr7	Bacteria
denovo16174	AP010951	3e-14	Azospirillum sp. B510	Bacteria
denovo16186	CP000390	8e-53	Chelativorans sp. BNC1	Bacteria
denovo162	AP012978	6e-73	endosymbiont of unidentified scaly snail isolate Monju	Bacteria
denovo1620	CP002568	8e-91	Polymorphum gilvum SL003B-26A1	Bacteria
denovo16205	CP000680	2e-86	Pseudomonas mendocina ymp	Bacteria
denovo16209	CP000927	1e-06	Caulobacter sp. K31	Bacteria
denovo16223	FJ868209	7e-60	uncultured gamma proteobacterium	Bacteria
denovo16232	CP003989	4e-94	Thioalkalivibrio nitratireducens DSM 14787	Bacteria
denovo16235	CP003746	1e-120	Simiduia agarivorans SA1 = DSM 21679	Bacteria
denovo16239	CP001339	4e-69	Thioalkalivibrio sulfidophilus HL-EbGr7	Bacteria
denovo16258	CP001796	2e-53	Pseudoalteromonas sp. SM9913	Bacteria
denovo1627	CP002209	1e-68	Ferrimonas balearica DSM 9799	Bacteria
denovo16276	CP002620	3e-83	Pseudomonas mendocina NK-01	Bacteria
denovo16283	LK391695	6e-86	Pseudomonas pseudoalcaligenes	Bacteria
denovo16310	CP003989	7e-98	Thioalkalivibrio nitratireducens DSM 14787	Bacteria
denovo16313	CP000103	8e-91	Nitrosospira multiformis ATCC 25196	Bacteria
denovo16320	CP000961	7e-35	Shewanella woodyi ATCC 51908	Bacteria
denovo16323	CP003093	2e-98	Pseudoxanthomonas spadix BD-a59	Bacteria
denovo16345	CP000381	8e-09	Neisseria meningitidis 053442	Bacteria
denovo16349	CP000680	1e-68	Pseudomonas mendocina ymp	Bacteria
denovo16352	CP000680	5e-81	Pseudomonas mendocina ymp	Bacteria
denovo16360	CP002623	2e-118	Roseobacter litoralis Och 149	Bacteria
denovo16369	CP000453	3e-71	Alkalilimnicola ehrlichii MLHE-1	Bacteria
denovo16377	CP008884	5e-93	Dyella japonica A8	Bacteria
denovo16379	CP001291	2e-35	Cyanothece sp. PCC 7424	Bacteria
denovo16392	CP001848	7e-16	Pirellula staleyi DSM 6068	Bacteria
denovo16399	CP000319	5e-74	Nitrobacter hamburgensis X14	Bacteria
denovo164	CP002623	6e-131	Roseobacter litoralis Och 149	Bacteria
denovo16417	CP002623	4e-54	Roseobacter litoralis Och 149	Bacteria
denovo16440	CP000680	5e-60	Pseudomonas mendocina ymp	Bacteria
denovo16441	CP000084	6e-175	Candidatus Pelagibacter ubique HTCC1062	Bacteria
denovo16452	CP003746	5e-99	Simiduia agarivorans SA1 = DSM 21679	Bacteria
denovo16453	CP006773	1e-63	Leisingera methylohalidivorans DSM 14336	Bacteria
denovo1646	CP006912	3e-52	Hyphomicrobium nitrativorans NL23	Bacteria
denovo16470	AP012978	5e-106	endosymbiont of unidentified scaly snail isolate Monju	Bacteria
denovo16471	CP000830	2e-110	Dinoroseobacter shibae DFL 12	Bacteria
denovo16478	CP000377	6e-93	Ruegeria sp. TM1040	Bacteria
denovo16483	LK391695	5e-87	Pseudomonas pseudoalcaligenes	Bacteria
denovo16499	AE017282	0.082	Methylococcus capsulatus str. Bath	Bacteria
denovo16507	CP000362	1e-157	Roseobacter denitrificans OCh 114	Bacteria
denovo16522	CP003989	5e-74	Thioalkalivibrio nitratireducens DSM 14787	Bacteria
denovo16529	CP003725	6e-99	Pseudomonas stutzeri DSM 10701	Bacteria
denovo16541	JX900952	2e-79	bacterium symbiont of Christineconcha regab	Bacteria
denovo16557	CP003725	3e-115	Pseudomonas stutzeri DSM 10701	Bacteria
denovo16558	CP002382	8e-91	Micavibrio aeruginosavorus ARL-13	Bacteria
denovo16566	CP004018	3.6	Rhizobium tropici CIAT 899	Bacteria
denovo16567	CP000680	8e-84	Pseudomonas mendocina ymp	Bacteria
denovo16572	CP000514	9e-64	Marinobacter aquaeolei VT8	Bacteria
denovo16574	FQ311868	5e-81	Azospirillum lipoferum 4B	Bacteria
denovo16585	CP002552	1e-145	Nitrosomonas sp. AL212	Bacteria
denovo16589	CP007130	0.1	Gemmatimonadetes bacterium KBS708	Bacteria
denovo16603	CP001707	3e-71	Kangiella koreensis DSM 16069	Bacteria
denovo16609	CP003171	2e-80	Oceanimonas sp. GK1	Bacteria
denovo16627	CP003740	3e-102	Octadecabacter antarcticus 307	Bacteria
denovo16629	KF521924	2e-61	deep-sea mussel NZ3 thioautotrophic gill symbiont	Bacteria
denovo16631	AP012547	3e-77	Sulfuritalea hydrogenivorans sk43H	Bacteria
denovo16639	FJ868209	3e-90	uncultured gamma proteobacterium	Bacteria
denovo16652	CP005963	2e-80	Spiribacter salinus M19-40	Bacteria
denovo16666	AP012978	1e-81	endosymbiont of unidentified scaly snail isolate Monju	Bacteria
denovo16678	CP001715	1e-18	Candidatus Accumulibacter phosphatis clade IIA str. UW-1	Bacteria
denovo16699	CP007067	2e-105	Rhizobium leguminosarum bv. trifolii CB782	Bacteria
denovo16748	CP002738	1e-69	Methylomonas methanica MC09	Bacteria
denovo1677	CP000282	7e-111	Saccharophagus degradans 2-40	Bacteria
denovo16775	CP001339	2e-67	Thioalkalivibrio sulfidophilus HL-EbGr7	Bacteria
denovo16776	CP007152	2e-72	Marinobacter sp. R9SW1	Bacteria
denovo16801	CP007444	7e-85	Dyella jiangningensis	Bacteria
denovo16812	CP001074	1e-89	Rhizobium etli CIAT 652	Bacteria
denovo16833	CP006773	1e-101	Leisingera methylohalidivorans DSM 14336	Bacteria
denovo16837	CP002623	3e-122	Roseobacter litoralis Och 149	Bacteria
denovo16838	CP000489	6e-112	Paracoccus denitrificans PD1222	Bacteria
denovo16842	CP002568	3e-77	Polymorphum gilvum SL003B-26A1	Bacteria
denovo16846	CP007224	3e-65	Pseudomonas aeruginosa PA96	Bacteria
denovo16864	CP007151	5e-73	Marinobacter sp. A3d10	Bacteria
denovo16867	CP005963	2e-78	Spiribacter salinus M19-40	Bacteria
denovo16869	CP001339	8e-78	Thioalkalivibrio sulfidophilus HL-EbGr7	Bacteria
denovo16872	FO203512	7e-60	Oleispira antarctica RB-8	Bacteria
denovo16879	CP003989	7e-60	Thioalkalivibrio nitratireducens DSM 14787	Bacteria
denovo16896	CP003740	1e-106	Octadecabacter antarcticus 307	Bacteria
denovo16926	CP003989	2e-67	Thioalkalivibrio nitratireducens DSM 14787	Bacteria
denovo16935	CP002157	1e-07	Maribacter sp. HTCC2170	Bacteria
denovo16947	CP001339	2e-46	Thioalkalivibrio sulfidophilus HL-EbGr7	Bacteria
denovo16956	CP000362	2e-118	Roseobacter denitrificans OCh 114	Bacteria
denovo16958	CP000388	0	Pseudoalteromonas atlantica T6c	Bacteria
denovo16984	CP002976	3e-121	Phaeobacter gallaeciensis DSM 17395 = CIP 105210	Bacteria
denovo16985	HG916855	0.023	Rhizobium sp. LPU83	Bacteria
denovo17	CP000362	8e-97	Roseobacter denitrificans OCh 114	Bacteria
denovo170	BA000040	4e-06	Bradyrhizobium diazoefficiens USDA 110	Bacteria
denovo17002	CP001339	2e-61	Thioalkalivibrio sulfidophilus HL-EbGr7	Bacteria
denovo17004	CP003147	1e-50	Pseudovibrio sp. FO-BEG1	Bacteria
denovo17010	CP000514	2e-73	Marinobacter aquaeolei VT8	Bacteria
denovo17018	CP007444	1e-74	Dyella jiangningensis	Bacteria
denovo17028	FJ868209	2e-111	uncultured gamma proteobacterium	Bacteria
denovo17029	CP001339	1e-132	Thioalkalivibrio sulfidophilus HL-EbGr7	Bacteria
denovo17062	CP001339	1e-50	Thioalkalivibrio sulfidophilus HL-EbGr7	Bacteria
denovo17072	CP007152	5e-94	Marinobacter sp. R9SW1	Bacteria
denovo17084	CP001101	7e-08	Chlorobium phaeobacteroides BS1	Bacteria
denovo17089	CP006852	3e-89	Pseudomonas sp. TKP	Bacteria
denovo17101	CP000680	5e-68	Pseudomonas mendocina ymp	Bacteria
denovo17112	CP001769	2e-28	Spirosoma linguale DSM 74	Bacteria
denovo17113	CP000489	2e-106	Paracoccus denitrificans PD1222	Bacteria
denovo17117	CP003563	8e-97	Sinorhizobium fredii USDA 257	Bacteria
denovo17119	CP003989	2e-74	Thioalkalivibrio nitratireducens DSM 14787	Bacteria
denovo17135	AE017282	8e-72	Methylococcus capsulatus str. Bath	Bacteria
denovo17142	CP003273	0.31	Desulfotomaculum gibsoniae DSM 7213	Bacteria
denovo17144	CP000680	5e-74	Pseudomonas mendocina ymp	Bacteria
denovo17158	CP002976	2e-110	Phaeobacter gallaeciensis DSM 17395 = CIP 105210	Bacteria
denovo17175	CP000514	7e-79	Marinobacter aquaeolei VT8	Bacteria
denovo17192	AP009247	3e-40	Candidatus Vesicomyosocius okutanii HA	Bacteria
denovo17193	CP001339	8e-53	Thioalkalivibrio sulfidophilus HL-EbGr7	Bacteria
denovo17204	AP012547	2e-80	Sulfuritalea hydrogenivorans sk43H	Bacteria
denovo17207	CP001281	6e-67	Thauera sp. MZ1T	Bacteria
denovo17210	CP001707	2e-110	Kangiella koreensis DSM 16069	Bacteria
denovo17211	CP002568	2e-92	Polymorphum gilvum SL003B-26A1	Bacteria
denovo17215	JX900958	4e-63	bacterium symbiont of Laubiericoncha chuni	Bacteria
denovo1722	CP007151	2e-70	Marinobacter sp. A3d10	Bacteria
denovo17231	CP007789	1e-69	Brucella melitensis bv. 2 str. 63/9	Bacteria
denovo17232	CP000031	5e-119	Ruegeria pomeroyi DSS-3	Bacteria
denovo17242	CP007793	8e-110	Azospirillum brasilense	Bacteria
denovo17247	FJ868209	1e-138	uncultured gamma proteobacterium	Bacteria
denovo17264	CP000302	2e-74	Shewanella denitrificans OS217	Bacteria
denovo17279	CP000680	5e-68	Pseudomonas mendocina ymp	Bacteria
denovo17282	CP003989	5e-106	Thioalkalivibrio nitratireducens DSM 14787	Bacteria
denovo17292	CP003746	3e-96	Simiduia agarivorans SA1 = DSM 21679	Bacteria
denovo17305	CP000084	9e-167	Candidatus Pelagibacter ubique HTCC1062	Bacteria
denovo17306	CP003653	8e-84	Stanieria cyanosphaera PCC 7437	Bacteria
denovo17308	FJ868209	2e-59	uncultured gamma proteobacterium	Bacteria
denovo17318	CP003989	1e-88	Thioalkalivibrio nitratireducens DSM 14787	Bacteria
denovo17322	FO117623	0.3	Blastococcus saxobsidens DD2	Bacteria
denovo17332	CP001101	3e-07	Chlorobium phaeobacteroides BS1	Bacteria
denovo17340	CP000830	5e-112	Dinoroseobacter shibae DFL 12	Bacteria
denovo17350	FQ859181	7e-85	Hyphomicrobium sp. MC1	Bacteria
denovo17358	CP001339	2e-54	Thioalkalivibrio sulfidophilus HL-EbGr7	Bacteria
denovo17360	CP001707	3e-52	Kangiella koreensis DSM 16069	Bacteria
denovo17382	CP003989	6e-79	Thioalkalivibrio nitratireducens DSM 14787	Bacteria
denovo17384	AP014522	2e-79	Pseudomonas protegens Cab57	Bacteria
denovo17393	CP003740	1e-106	Octadecabacter antarcticus 307	Bacteria
denovo17395	CP000453	2e-54	Alkalilimnicola ehrlichii MLHE-1	Bacteria
denovo17398	CP005965	0.31	Bacillus licheniformis 9945A	Bacteria
denovo174	CP000613	1e-56	Rhodospirillum centenum SW	Bacteria
denovo17404	CP001339	1e-44	Thioalkalivibrio sulfidophilus HL-EbGr7	Bacteria
denovo17411	CP000961	1e-61	Shewanella woodyi ATCC 51908	Bacteria
denovo17412	CP000514	3e-54	Marinobacter aquaeolei VT8	Bacteria
denovo17425	CP000155	5e-106	Hahella chejuensis KCTC 2396	Bacteria
denovo17440	CP003746	4e-108	Simiduia agarivorans SA1 = DSM 21679	Bacteria
denovo17473	CP002987	1e-09	Acetobacterium woodii DSM 1030	Bacteria
denovo17476	CP003071	1e-107	Pseudomonas stutzeri RCH2	Bacteria
denovo17484	CP006900	1e-75	Pandoraea pnomenusa 3kgm	Bacteria
denovo17491	FP565575	2e-22	Candidatus Methylomirabilis oxyfera	Bacteria
denovo17523	CP006966	8e-91	Phaeobacter gallaeciensis DSM 26640	Bacteria
denovo17528	CP002959	0.028	Turneriella parva DSM 21527	Bacteria
denovo17529	CP003989	3e-83	Thioalkalivibrio nitratireducens DSM 14787	Bacteria
denovo17550	CP002972	8e-64	Phaeobacter gallaeciensis 2.10	Bacteria
denovo17584	CP005996	7e-73	Cycloclasticus zancles 7-ME	Bacteria
denovo17585	CP006912	8e-110	Hyphomicrobium nitrativorans NL23	Bacteria
denovo17596	CP001339	3e-58	Thioalkalivibrio sulfidophilus HL-EbGr7	Bacteria
denovo17598	CP000698	0.002	Geobacter uraniireducens Rf4	Bacteria
denovo17603	AP010946	1e-87	Azospirillum sp. B510	Bacteria
denovo17609	CP001707	8e-78	Kangiella koreensis DSM 16069	Bacteria
denovo17612	FJ868209	8e-66	uncultured gamma proteobacterium	Bacteria
denovo17616	FJ899951	7e-72	Ectenagena extenta gill symbiont	Bacteria
denovo17631	CP003740	3e-109	Octadecabacter antarcticus 307	Bacteria
denovo17644	CP002629	0.027	Desulfobacca acetoxidans DSM 11109	Bacteria
denovo17649	CP002972	7e-123	Phaeobacter gallaeciensis 2.10	Bacteria
denovo17650	CP000282	1e-95	Saccharophagus degradans 2-40	Bacteria
denovo17655	CP007793	3e-109	Azospirillum brasilense	Bacteria
denovo17659	CP006581	8e-116	Mesorhizobium huakuii 7653R	Bacteria
denovo17669	CP000680	5e-67	Pseudomonas mendocina ymp	Bacteria
denovo17685	CP005996	2e-85	Cycloclasticus zancles 7-ME	Bacteria
denovo17692	CP003600	1e-13	Chamaesiphon minutus PCC 6605	Bacteria
denovo17696	CP000362	2e-105	Roseobacter denitrificans OCh 114	Bacteria
denovo17738	CP000961	1e-69	Shewanella woodyi ATCC 51908	Bacteria
denovo17744	CP003364	3e-20	Singulisphaera acidiphila DSM 18658	Bacteria
denovo17753	CP006581	1e-101	Mesorhizobium huakuii 7653R	Bacteria
denovo17755	CP002568	6e-92	Polymorphum gilvum SL003B-26A1	Bacteria
denovo17807	AE017282	9e-84	Methylococcus capsulatus str. Bath	Bacteria
denovo17815	CP006773	7e-98	Leisingera methylohalidivorans DSM 14336	Bacteria
denovo17825	HG917868	2e-22	Clostridium sp. M2/40	Bacteria
denovo17827	CP000680	2e-72	Pseudomonas mendocina ymp	Bacteria
denovo17832	CP006773	6e-111	Leisingera methylohalidivorans DSM 14336	Bacteria
denovo17853	CP003989	2e-67	Thioalkalivibrio nitratireducens DSM 14787	Bacteria
denovo17859	AP012978	6e-130	endosymbiont of unidentified scaly snail isolate Monju	Bacteria
denovo17883	CP002738	3e-76	Methylomonas methanica MC09	Bacteria
denovo17884	LK391695	0.29	Pseudomonas pseudoalcaligenes	Bacteria
denovo17888	CP000270	1e-05	Burkholderia xenovorans LB400	Bacteria
denovo17893	CP004345	2e-16	Morganella morganii subsp. morganii KT	Bacteria
denovo17894	CP002084	8e-34	Dehalogenimonas lykanthroporepellens BL-DC-9	Bacteria
denovo17901	CP005996	2e-79	Cycloclasticus zancles 7-ME	Bacteria
denovo17902	CP000514	1e-62	Marinobacter aquaeolei VT8	Bacteria
denovo17917	LK391695	1e-76	Pseudomonas pseudoalcaligenes	Bacteria
denovo17918	CP002156	6e-54	Parvularcula bermudensis HTCC2503	Bacteria
denovo17922	FJ868209	3e-108	uncultured gamma proteobacterium	Bacteria
denovo17930	CP000830	1e-113	Dinoroseobacter shibae DFL 12	Bacteria
denovo17936	CP002157	4e-57	Maribacter sp. HTCC2170	Bacteria
denovo1797	CP003380	6e-29	Methylophaga sp. JAM7	Bacteria
denovo17978	CP006966	3e-115	Phaeobacter gallaeciensis DSM 26640	Bacteria
denovo17987	FJ868209	4e-171	uncultured gamma proteobacterium	Bacteria
denovo17992	CP002859	7e-35	Runella slithyformis DSM 19594	Bacteria
denovo18001	CP000155	3e-84	Hahella chejuensis KCTC 2396	Bacteria
denovo18030	CP001339	2e-46	Thioalkalivibrio sulfidophilus HL-EbGr7	Bacteria
denovo18041	CP000830	7e-117	Dinoroseobacter shibae DFL 12	Bacteria
denovo18042	CP003740	2e-118	Octadecabacter antarcticus 307	Bacteria
denovo18045	CP007444	9e-90	Dyella jiangningensis	Bacteria
denovo18048	CP007444	6e-61	Dyella jiangningensis	Bacteria
denovo18049	CP002568	3e-59	Polymorphum gilvum SL003B-26A1	Bacteria
denovo18051	CP003989	3e-89	Thioalkalivibrio nitratireducens DSM 14787	Bacteria
denovo18052	CP003418	0.007	Ignavibacterium album JCM 16511	Bacteria
denovo18063	CP002352	3e-05	Bacteroides helcogenes P 36-108	Bacteria
denovo18073	CP008696	3e-103	Pseudomonas chlororaphis	Bacteria
denovo18087	CP001339	2e-99	Thioalkalivibrio sulfidophilus HL-EbGr7	Bacteria
denovo18088	CP003725	7e-104	Pseudomonas stutzeri DSM 10701	Bacteria
denovo18100	CP000362	3e-154	Roseobacter denitrificans OCh 114	Bacteria
denovo18106	CP000282	1e-108	Saccharophagus degradans 2-40	Bacteria
denovo18118	AP012547	2e-73	Sulfuritalea hydrogenivorans sk43H	Bacteria
denovo18131	CP002085	5e-17	Desulfarculus baarsii DSM 2075	Bacteria
denovo18138	CP000680	1e-95	Pseudomonas mendocina ymp	Bacteria
denovo18139	CP007151	2e-72	Marinobacter sp. A3d10	Bacteria
denovo18145	CP007444	1e-82	Dyella jiangningensis	Bacteria
denovo18146	CP000830	3e-89	Dinoroseobacter shibae DFL 12	Bacteria
denovo18149	AP012547	2e-98	Sulfuritalea hydrogenivorans sk43H	Bacteria
denovo18178	CP002568	1e-62	Polymorphum gilvum SL003B-26A1	Bacteria
denovo18181	CP007151	5e-74	Marinobacter sp. A3d10	Bacteria
denovo18193	CP006581	7e-85	Mesorhizobium huakuii 7653R	Bacteria
denovo18206	CP001339	4e-44	Thioalkalivibrio sulfidophilus HL-EbGr7	Bacteria
denovo18209	FJ868208	4e-107	uncultured gamma proteobacterium	Bacteria
denovo18215	AP012547	7e-104	Sulfuritalea hydrogenivorans sk43H	Bacteria
denovo18220	AP014522	5e-93	Pseudomonas protegens Cab57	Bacteria
denovo18226	CP000830	3e-90	Dinoroseobacter shibae DFL 12	Bacteria
denovo18234	CP006912	1e-101	Hyphomicrobium nitrativorans NL23	Bacteria
denovo18243	CP002620	7e-33	Pseudomonas mendocina NK-01	Bacteria
denovo18248	CP001339	2e-105	Thioalkalivibrio sulfidophilus HL-EbGr7	Bacteria
denovo18253	CP003538	2e-54	Micavibrio aeruginosavorus EPB	Bacteria
denovo18271	CP000514	7e-66	Marinobacter aquaeolei VT8	Bacteria
denovo18272	CP003989	6e-86	Thioalkalivibrio nitratireducens DSM 14787	Bacteria
denovo18281	AP012547	5e-74	Sulfuritalea hydrogenivorans sk43H	Bacteria
denovo18290	CP003281	7e-73	Belliella baltica DSM 15883	Bacteria
denovo18291	CP008847	0.025	Bacillus anthracis	Bacteria
denovo18300	CP003882	0.013	Borrelia afzelii HLJ01	Bacteria
denovo18307	CP000362	2e-86	Roseobacter denitrificans OCh 114	Bacteria
denovo18308	CP005976	4e-69	Pseudomonas putida H8234	Bacteria
denovo1831	AP012547	4e-88	Sulfuritalea hydrogenivorans sk43H	Bacteria
denovo18320	CP003989	8e-72	Thioalkalivibrio nitratireducens DSM 14787	Bacteria
denovo18341	CP002620	2e-67	Pseudomonas mendocina NK-01	Bacteria
denovo18352	CP003150	1e-80	Pseudomonas fluorescens F113	Bacteria
denovo18360	AP010946	1e-50	Azospirillum sp. B510	Bacteria
denovo18381	CU458896	0.28	Mycobacterium abscessus	Bacteria
denovo18411	FJ868209	7e-73	uncultured gamma proteobacterium	Bacteria
denovo18426	CP008884	1e-81	Dyella japonica A8	Bacteria
denovo18432	CP003984	4e-89	Candidatus Planktomarina temperata RCA23	Bacteria
denovo18438	CP000830	1e-107	Dinoroseobacter shibae DFL 12	Bacteria
denovo18442	CP007757	2e-10	Halomonas campaniensis	Bacteria
denovo18445	CP003563	9e-116	Sinorhizobium fredii USDA 257	Bacteria
denovo18446	CP002546	3e-06	Planctomyces brasiliensis DSM 5305	Bacteria
denovo18456	FJ868209	4e-75	uncultured gamma proteobacterium	Bacteria
denovo18463	CP007494	4e-82	Bordetella holmesii ATCC 51541	Bacteria
denovo18465	CP000103	3e-89	Nitrosospira multiformis ATCC 25196	Bacteria
denovo18488	CP005996	6e-80	Cycloclasticus zancles 7-ME	Bacteria
denovo18497	AP011177	4e-126	Shewanella violacea DSS12	Bacteria
denovo18503	AP012978	7e-130	endosymbiont of unidentified scaly snail isolate Monju	Bacteria
denovo18512	HG966617	2e-47	bacterium Ec32	Bacteria
denovo18523	CP000859	1e-10	Desulfococcus oleovorans Hxd3	Bacteria
denovo1854	CP000680	2e-79	Pseudomonas mendocina ymp	Bacteria
denovo18542	CP005990	4e-88	Spiribacter sp. UAH-SP71	Bacteria
denovo18547	CP001751	3e-46	Candidatus Puniceispirillum marinum IMCC1322	Bacteria
denovo18555	CP000141	0.0002	Carboxydothermus hydrogenoformans Z-2901	Bacteria
denovo18574	CP006912	5e-100	Hyphomicrobium nitrativorans NL23	Bacteria
denovo1859	CP002156	2e-67	Parvularcula bermudensis HTCC2503	Bacteria
denovo18593	CP002738	3e-64	Methylomonas methanica MC09	Bacteria
denovo18603	FO538765	2e-17	Magnetospira sp. QH-2	Bacteria
denovo18613	CP000680	2e-73	Pseudomonas mendocina ymp	Bacteria
denovo18616	CP000362	2e-72	Roseobacter denitrificans OCh 114	Bacteria
denovo1862	CP008884	2e-78	Dyella japonica A8	Bacteria
denovo18621	CP001339	1e-120	Thioalkalivibrio sulfidophilus HL-EbGr7	Bacteria
denovo18627	CP002976	1e-113	Phaeobacter gallaeciensis DSM 17395 = CIP 105210	Bacteria
denovo18628	FJ868208	1e-114	uncultured gamma proteobacterium	Bacteria
denovo18650	CP002976	7e-111	Phaeobacter gallaeciensis DSM 17395 = CIP 105210	Bacteria
denovo18671	CP000514	4e-75	Marinobacter aquaeolei VT8	Bacteria
denovo18673	CP001339	8e-53	Thioalkalivibrio sulfidophilus HL-EbGr7	Bacteria
denovo18691	BA000040	6e-10	Bradyrhizobium diazoefficiens USDA 110	Bacteria
denovo18692	CP000514	3e-64	Marinobacter aquaeolei VT8	Bacteria
denovo18698	AP012978	3e-64	endosymbiont of unidentified scaly snail isolate Monju	Bacteria
denovo18714	GU474870	6e-09	uncultured alpha proteobacterium HF0130_20P23	Bacteria
denovo18727	FR695865	2e-19	uncultured Desulfobacterium sp.	Bacteria
denovo18731	CP002620	1e-82	Pseudomonas mendocina NK-01	Bacteria
denovo18738	CP001339	3e-50	Thioalkalivibrio sulfidophilus HL-EbGr7	Bacteria
denovo18757	CP007444	2e-79	Dyella jiangningensis	Bacteria
denovo18759	CP003720	0.34	Streptomyces hygroscopicus subsp. jinggangensis TL01	Bacteria
denovo18761	CP000155	3e-89	Hahella chejuensis KCTC 2396	Bacteria
denovo18765	CP003740	3e-115	Octadecabacter antarcticus 307	Bacteria
denovo18769	CP005996	8e-72	Cycloclasticus zancles 7-ME	Bacteria
denovo1877	FJ868209	4e-50	uncultured gamma proteobacterium	Bacteria
denovo18770	CP000157	2e-123	Erythrobacter litoralis HTCC2594	Bacteria
denovo18777	AP012547	2e-73	Sulfuritalea hydrogenivorans sk43H	Bacteria
denovo18785	AP012547	8e-97	Sulfuritalea hydrogenivorans sk43H	Bacteria
denovo18792	FO203503	8e-33	Desulfobacula toluolica Tol2	Bacteria
denovo18797	CP005996	4e-82	Cycloclasticus zancles 7-ME	Bacteria
denovo1880	FJ868208	3e-115	uncultured gamma proteobacterium	Bacteria
denovo18807	LK391695	1e-75	Pseudomonas pseudoalcaligenes	Bacteria
denovo18813	CP003844	1e-05	Alteromonas macleodii str. 'English Channel 673'	Bacteria
denovo18814	CP000031	4e-108	Ruegeria pomeroyi DSS-3	Bacteria
denovo18838	CP007152	9e-14	Marinobacter sp. R9SW1	Bacteria
denovo18845	CP006979	0.9	Pseudomonas monteilii SB3101	Bacteria
denovo18851	FJ868209	7e-60	uncultured gamma proteobacterium	Bacteria
denovo1886	AP012547	1e-100	Sulfuritalea hydrogenivorans sk43H	Bacteria
denovo1887	CP000362	1e-61	Roseobacter denitrificans OCh 114	Bacteria
denovo18875	CP003726	0.09	Enterococcus faecalis D32	Bacteria
denovo18881	CP006719	7e-66	Vibrio alginolyticus NBRC 15630 = ATCC 17749	Bacteria
denovo18884	LK391695	2e-73	Pseudomonas pseudoalcaligenes	Bacteria
denovo18905	LK391695	1e-75	Pseudomonas pseudoalcaligenes	Bacteria
denovo1891	CP001339	3e-36	Thioalkalivibrio sulfidophilus HL-EbGr7	Bacteria
denovo18920	CP006966	7e-98	Phaeobacter gallaeciensis DSM 26640	Bacteria
denovo18929	CP001751	4e-133	Candidatus Puniceispirillum marinum IMCC1322	Bacteria
denovo18934	CP007627	4e-06	Flavobacterium psychrophilum	Bacteria
denovo18944	CP002623	7e-117	Roseobacter litoralis Och 149	Bacteria
denovo18946	CP003653	3e-97	Stanieria cyanosphaera PCC 7437	Bacteria
denovo18961	CP000453	4e-69	Alkalilimnicola ehrlichii MLHE-1	Bacteria
denovo18972	CP007151	5e-67	Marinobacter sp. A3d10	Bacteria
denovo18977	CP001796	2e-52	Pseudoalteromonas sp. SM9913	Bacteria
denovo19007	CP001744	3e-07	Planctomyces limnophilus DSM 3776	Bacteria
denovo19017	CP008884	3e-89	Dyella japonica A8	Bacteria
denovo1902	AP012547	2e-97	Sulfuritalea hydrogenivorans sk43H	Bacteria
denovo19033	CP007151	5e-74	Marinobacter sp. A3d10	Bacteria
denovo19046	CP003989	6e-99	Thioalkalivibrio nitratireducens DSM 14787	Bacteria
denovo19055	CP001339	1e-48	Thioalkalivibrio sulfidophilus HL-EbGr7	Bacteria
denovo19060	CP000510	0.001	Psychromonas ingrahamii 37	Bacteria
denovo19073	LK391695	2e-72	Pseudomonas pseudoalcaligenes	Bacteria
denovo19074	CP000514	6e-73	Marinobacter aquaeolei VT8	Bacteria
denovo19080	CP000304	1e-68	Pseudomonas stutzeri A1501	Bacteria
denovo19089	CP007152	4e-56	Marinobacter sp. R9SW1	Bacteria
denovo19095	CP003154	9e-08	Thiocystis violascens DSM 198	Bacteria
denovo19102	CP003610	1e-20	Calothrix sp. PCC 6303	Bacteria
denovo19104	CP002431	1e-09	Desulfovibrio aespoeensis Aspo-2	Bacteria
denovo19113	CP006912	3e-96	Hyphomicrobium nitrativorans NL23	Bacteria
denovo19117	FR695872	2e-26	uncultured Desulfobacterium sp.	Bacteria
denovo1912	AP010946	5e-68	Azospirillum sp. B510	Bacteria
denovo19131	CP002738	3e-90	Methylomonas methanica MC09	Bacteria
denovo19142	CP003984	9e-103	Candidatus Planktomarina temperata RCA23	Bacteria
denovo19147	CP000471	0.08	Magnetococcus marinus MC-1	Bacteria
denovo19159	CP002738	4e-76	Methylomonas methanica MC09	Bacteria
denovo19175	FJ868209	2e-72	uncultured gamma proteobacterium	Bacteria
denovo19184	CT573326	4e-107	Pseudomonas entomophila L48	Bacteria
denovo19185	AP012547	1e-74	Sulfuritalea hydrogenivorans sk43H	Bacteria
denovo1919	CP001701	3e-43	Cyanothece sp. PCC 8802	Bacteria
denovo19194	CP007509	0.32	Pseudomonas stutzeri	Bacteria
denovo192	CP002116	2e-09	Spirochaeta smaragdinae DSM 11293	Bacteria
denovo1920	CP000514	3e-62	Marinobacter aquaeolei VT8	Bacteria
denovo19203	CP003989	1e-69	Thioalkalivibrio nitratireducens DSM 14787	Bacteria
denovo19210	CP000084	6e-49	Candidatus Pelagibacter ubique HTCC1062	Bacteria
denovo19214	CP000680	4e-95	Pseudomonas mendocina ymp	Bacteria
denovo19224	FP476056	0.067	Zobellia galactanivorans	Bacteria
denovo19226	CP003740	1e-107	Octadecabacter antarcticus 307	Bacteria
denovo19230	CP003740	3e-109	Octadecabacter antarcticus 307	Bacteria
denovo19245	CP003653	3e-71	Stanieria cyanosphaera PCC 7437	Bacteria
denovo19249	CP003845	5e-61	Alteromonas macleodii str. 'Black Sea 11'	Bacteria
denovo19259	AP012337	4e-37	Caldilinea aerophila DSM 14535 = NBRC 104270	Bacteria
denovo1926	CP008884	1e-62	Dyella japonica A8	Bacteria
denovo19264	CP006898	4e-75	Brucella ceti TE28753-12	Bacteria
denovo19294	CP007152	5e-74	Marinobacter sp. R9SW1	Bacteria
denovo19313	CP007039	1e-34	Pseudomonas cichorii JBC1	Bacteria
denovo19331	CP007444	3e-84	Dyella jiangningensis	Bacteria
denovo19337	CP003989	2e-34	Thioalkalivibrio nitratireducens DSM 14787	Bacteria
denovo1934	CP000158	2e-53	Hyphomonas neptunium ATCC 15444	Bacteria
denovo19341	CP002568	2e-72	Polymorphum gilvum SL003B-26A1	Bacteria
denovo19350	CP003989	2e-92	Thioalkalivibrio nitratireducens DSM 14787	Bacteria
denovo19353	CP003746	3e-109	Simiduia agarivorans SA1 = DSM 21679	Bacteria
denovo19354	FO203427	3e-08	Desulfovibrio piezophilus C1TLV30	Bacteria
denovo19359	CP000859	2e-67	Desulfococcus oleovorans Hxd3	Bacteria
denovo19372	CP000514	1e-74	Marinobacter aquaeolei VT8	Bacteria
denovo19384	CP002545	4e-51	Pedobacter saltans DSM 12145	Bacteria
denovo19386	CP002972	1e-95	Phaeobacter gallaeciensis 2.10	Bacteria
denovo1939	CP003725	6e-105	Pseudomonas stutzeri DSM 10701	Bacteria
denovo19414	CP002157	9e-71	Maribacter sp. HTCC2170	Bacteria
denovo19419	AP012547	6e-67	Sulfuritalea hydrogenivorans sk43H	Bacteria
denovo19423	CP001197	0.0005	Desulfovibrio vulgaris str. 'Miyazaki F'	Bacteria
denovo19427	FO681494	5e-55	Xanthomonas fuscans subsp. fuscans	Bacteria
denovo19428	CP003989	3e-83	Thioalkalivibrio nitratireducens DSM 14787	Bacteria
denovo19443	CP000680	6e-86	Pseudomonas mendocina ymp	Bacteria
denovo19444	CP002046	0.007	Croceibacter atlanticus HTCC2559	Bacteria
denovo19447	CP003989	3e-77	Thioalkalivibrio nitratireducens DSM 14787	Bacteria
denovo19453	CP002972	5e-119	Phaeobacter gallaeciensis 2.10	Bacteria
denovo19463	CP005996	4e-88	Cycloclasticus zancles 7-ME	Bacteria
denovo1948	CP002986	0.092	Stenotrophomonas maltophilia JV3	Bacteria
denovo1949	CP000250	3e-45	Rhodopseudomonas palustris HaA2	Bacteria
denovo19494	CP007567	1e-41	Aeromonas media WS	Bacteria
denovo19531	CP000680	4e-68	Pseudomonas mendocina ymp	Bacteria
denovo19534	FJ899951	1e-76	Ectenagena extenta gill symbiont	Bacteria
denovo19535	CP002738	1e-100	Methylomonas methanica MC09	Bacteria
denovo19537	CP002881	1e-74	Pseudomonas stutzeri ATCC 17588 = LMG 11199	Bacteria
denovo19553	CP007739	0.28	Bacillus methanolicus MGA3	Bacteria
denovo19560	FJ868209	1e-57	uncultured gamma proteobacterium	Bacteria
denovo19561	AP012547	6e-79	Sulfuritalea hydrogenivorans sk43H	Bacteria
denovo19569	FJ868208	1e-88	uncultured gamma proteobacterium	Bacteria
denovo19572	CP007151	1e-62	Marinobacter sp. A3d10	Bacteria
denovo19577	CP001339	4e-50	Thioalkalivibrio sulfidophilus HL-EbGr7	Bacteria
denovo19585	CP001339	3e-46	Thioalkalivibrio sulfidophilus HL-EbGr7	Bacteria
denovo19586	FM954973	2e-106	Vibrio splendidus LGP32	Bacteria
denovo19606	CP001339	2e-42	Thioalkalivibrio sulfidophilus HL-EbGr7	Bacteria
denovo19628	CP002157	2e-47	Maribacter sp. HTCC2170	Bacteria
denovo1966	LK391695	8e-71	Pseudomonas pseudoalcaligenes	Bacteria
denovo19662	CP001339	1e-87	Thioalkalivibrio sulfidophilus HL-EbGr7	Bacteria
denovo19663	CP008804	4e-06	Moraxella catarrhalis	Bacteria
denovo19668	AP012547	8e-91	Sulfuritalea hydrogenivorans sk43H	Bacteria
denovo19669	CP003653	2e-61	Stanieria cyanosphaera PCC 7437	Bacteria
denovo1967	AP012547	5e-87	Sulfuritalea hydrogenivorans sk43H	Bacteria
denovo19672	HG530135	1.8	Clostridium tetani 12124569	Bacteria
denovo19673	FO203503	3e-14	Desulfobacula toluolica Tol2	Bacteria
denovo19676	CP002378	8e-72	Vibrio furnissii NCTC 11218	Bacteria
denovo19698	AP012978	1e-57	endosymbiont of unidentified scaly snail isolate Monju	Bacteria
denovo19701	AP012978	3e-63	endosymbiont of unidentified scaly snail isolate Monju	Bacteria
denovo19704	CP000514	3e-71	Marinobacter aquaeolei VT8	Bacteria
denovo19710	CP007151	2e-72	Marinobacter sp. A3d10	Bacteria
denovo19711	CP003653	6e-08	Stanieria cyanosphaera PCC 7437	Bacteria
denovo1972	AP012978	2e-110	endosymbiont of unidentified scaly snail isolate Monju	Bacteria
denovo19746	CP003380	2e-11	Methylophaga sp. JAM7	Bacteria
denovo1977	CP000680	5e-62	Pseudomonas mendocina ymp	Bacteria
denovo1979	CP000155	2e-72	Hahella chejuensis KCTC 2396	Bacteria
denovo19791	CP003989	5e-81	Thioalkalivibrio nitratireducens DSM 14787	Bacteria
denovo19811	CP003587	3e-07	Gloeobacter kilaueensis JS1	Bacteria
denovo19829	CP001707	1e-108	Kangiella koreensis DSM 16069	Bacteria
denovo1983	CP003470	1e-75	Rhodanobacter sp. 2APBS1	Bacteria
denovo19832	CP001339	2e-54	Thioalkalivibrio sulfidophilus HL-EbGr7	Bacteria
denovo19839	AE017282	6e-67	Methylococcus capsulatus str. Bath	Bacteria
denovo19841	CP002056	5e-17	Methylotenera versatilis 301	Bacteria
denovo19842	AE016796	9e-135	Vibrio vulnificus CMCP6	Bacteria
denovo19860	CP002972	6e-105	Phaeobacter gallaeciensis 2.10	Bacteria
denovo19861	CP001339	1e-50	Thioalkalivibrio sulfidophilus HL-EbGr7	Bacteria
denovo19862	FO203363	3e-77	Marinobacter hydrocarbonoclasticus ATCC 49840	Bacteria
denovo1988	CP003107	4e-18	Paenibacillus terrae HPL-003	Bacteria
denovo19880	CP003725	2e-116	Pseudomonas stutzeri DSM 10701	Bacteria
denovo19899	CP000830	1e-106	Dinoroseobacter shibae DFL 12	Bacteria
denovo19906	CP006898	2e-73	Brucella ceti TE28753-12	Bacteria
denovo19911	CR378663	5e-81	Photobacterium profundum SS9	Bacteria
denovo19921	AP012603	2e-10	Bradyrhizobium oligotrophicum S58	Bacteria
denovo19935	CP005963	2e-79	Spiribacter salinus M19-40	Bacteria
denovo19945	CP003740	2e-112	Octadecabacter antarcticus 307	Bacteria
denovo19954	FO203427	0.001	Desulfovibrio piezophilus C1TLV30	Bacteria
denovo19958	AP012978	1e-81	endosymbiont of unidentified scaly snail isolate Monju	Bacteria
denovo19989	CP000084	7e-149	Candidatus Pelagibacter ubique HTCC1062	Bacteria
denovo19998	HE577327	2e-59	Azospirillum brasilense Sp245	Bacteria
denovo20005	CP003989	5e-61	Thioalkalivibrio nitratireducens DSM 14787	Bacteria
denovo20008	CP000282	3e-96	Saccharophagus degradans 2-40	Bacteria
denovo20009	CP000859	2e-49	Desulfococcus oleovorans Hxd3	Bacteria
denovo20023	CP001796	1e-54	Pseudoalteromonas sp. SM9913	Bacteria
denovo20029	CP001339	5e-49	Thioalkalivibrio sulfidophilus HL-EbGr7	Bacteria
denovo20056	AP013063	1.1	Serratia marcescens SM39	Bacteria
denovo20057	FJ899959	8e-97	Vesicomya sp. mt-I symbiont	Bacteria
denovo20059	CP002568	1e-95	Polymorphum gilvum SL003B-26A1	Bacteria
denovo20060	CP001339	2e-111	Thioalkalivibrio sulfidophilus HL-EbGr7	Bacteria
denovo20079	CP000961	2e-46	Shewanella woodyi ATCC 51908	Bacteria
denovo20086	AP012547	5e-80	Sulfuritalea hydrogenivorans sk43H	Bacteria
denovo2009	CP003740	5e-119	Octadecabacter antarcticus 307	Bacteria
denovo20092	CP002344	1.1	Thermaerobacter marianensis DSM 12885	Bacteria
denovo20094	CP003653	9e-129	Stanieria cyanosphaera PCC 7437	Bacteria
denovo20099	CP007152	7e-79	Marinobacter sp. R9SW1	Bacteria
denovo20107	CP005963	2e-66	Spiribacter salinus M19-40	Bacteria
denovo20119	CP000155	2e-92	Hahella chejuensis KCTC 2396	Bacteria
denovo20133	CP001339	9e-59	Thioalkalivibrio sulfidophilus HL-EbGr7	Bacteria
denovo20136	CP003985	0.0004	Desulfocapsa sulfexigens DSM 10523	Bacteria
denovo2014	CP000362	8e-142	Roseobacter denitrificans OCh 114	Bacteria
denovo20149	CP002568	6e-80	Polymorphum gilvum SL003B-26A1	Bacteria
denovo20151	CP000158	1e-63	Hyphomonas neptunium ATCC 15444	Bacteria
denovo2016	FJ868208	1e-108	uncultured gamma proteobacterium	Bacteria
denovo20169	AP012547	7e-79	Sulfuritalea hydrogenivorans sk43H	Bacteria
denovo20181	CP007152	3e-90	Marinobacter sp. R9SW1	Bacteria
denovo20190	CP002738	8e-72	Methylomonas methanica MC09	Bacteria
denovo20191	FJ899953	5e-35	Vesicomya sp. endosymbiont	Bacteria
denovo20203	CP000514	8e-66	Marinobacter aquaeolei VT8	Bacteria
denovo20207	CP001339	2e-38	Thioalkalivibrio sulfidophilus HL-EbGr7	Bacteria
denovo20209	FQ976920	0.0002	Magnetospirillum sp. pMbN1	Bacteria
denovo20210	CP007532	0.29	Salmonella enterica subsp. enterica serovar Abaetetuba str. ATCC 35640	Bacteria
denovo20214	CP007444	4e-61	Dyella jiangningensis	Bacteria
denovo20220	CP000698	5e-05	Geobacter uraniireducens Rf4	Bacteria
denovo2023	FJ868209	8e-110	uncultured gamma proteobacterium	Bacteria
denovo20237	CP003989	7e-85	Thioalkalivibrio nitratireducens DSM 14787	Bacteria
denovo20249	CP002552	1e-06	Nitrosomonas sp. AL212	Bacteria
denovo20262	JX900958	5e-68	bacterium symbiont of Laubiericoncha chuni	Bacteria
denovo20263	AP012978	4e-82	endosymbiont of unidentified scaly snail isolate Monju	Bacteria
denovo20274	AP012547	3e-71	Sulfuritalea hydrogenivorans sk43H	Bacteria
denovo20281	CP000362	7e-123	Roseobacter denitrificans OCh 114	Bacteria
denovo20286	CP006852	2e-72	Pseudomonas sp. TKP	Bacteria
denovo20299	CP002738	2e-98	Methylomonas methanica MC09	Bacteria
denovo2030	CP001349	0.3	Methylobacterium nodulans ORS 2060	Bacteria
denovo20303	AP012547	7e-98	Sulfuritalea hydrogenivorans sk43H	Bacteria
denovo20325	CP002738	2e-79	Methylomonas methanica MC09	Bacteria
denovo2033	CP008696	4e-88	Pseudomonas chlororaphis	Bacteria
denovo20330	CP001339	5e-49	Thioalkalivibrio sulfidophilus HL-EbGr7	Bacteria
denovo20339	CP003590	3e-91	Pleurocapsa sp. PCC 7327	Bacteria
denovo20341	CP000090	2e-86	Ralstonia eutropha JMP134	Bacteria
denovo20345	FR668087	0.008	Mycoplasma leachii 99/014/6	Bacteria
denovo20365	CP001339	1e-101	Thioalkalivibrio sulfidophilus HL-EbGr7	Bacteria
denovo20367	CP000514	2e-73	Marinobacter aquaeolei VT8	Bacteria
denovo20376	CP000472	1e-62	Shewanella piezotolerans WP3	Bacteria
denovo20426	CP001339	6e-156	Thioalkalivibrio sulfidophilus HL-EbGr7	Bacteria
denovo20437	CP005963	7e-73	Spiribacter salinus M19-40	Bacteria
denovo20439	CP000830	2e-106	Dinoroseobacter shibae DFL 12	Bacteria
denovo20462	CP001339	4e-75	Thioalkalivibrio sulfidophilus HL-EbGr7	Bacteria
denovo2047	CP002568	2e-79	Polymorphum gilvum SL003B-26A1	Bacteria
denovo20489	AP014622	2e-72	Pseudomonas aeruginosa	Bacteria
denovo20490	CP000686	1e-17	Roseiflexus sp. RS-1	Bacteria
denovo20495	LK391695	1e-70	Pseudomonas pseudoalcaligenes	Bacteria
denovo20498	CP003985	1e-108	Desulfocapsa sulfexigens DSM 10523	Bacteria
denovo20518	CP000514	7e-51	Marinobacter aquaeolei VT8	Bacteria
denovo20522	CP001650	1e-51	Zunongwangia profunda SM-A87	Bacteria
denovo20523	CP001339	3e-38	Thioalkalivibrio sulfidophilus HL-EbGr7	Bacteria
denovo20533	HG794546	8e-47	Magnetospirillum gryphiswaldense MSR-1 v2	Bacteria
denovo20572	CP003740	2e-110	Octadecabacter antarcticus 307	Bacteria
denovo20585	CP003989	2e-92	Thioalkalivibrio nitratireducens DSM 14787	Bacteria
denovo20590	CP000031	5e-49	Ruegeria pomeroyi DSS-3	Bacteria
denovo2060	CP002738	5e-54	Methylomonas methanica MC09	Bacteria
denovo20606	CP002546	0.092	Planctomyces brasiliensis DSM 5305	Bacteria
denovo20608	CP000302	6e-73	Shewanella denitrificans OS217	Bacteria
denovo20612	CP000680	1e-81	Pseudomonas mendocina ymp	Bacteria
denovo20649	CP001339	3e-89	Thioalkalivibrio sulfidophilus HL-EbGr7	Bacteria
denovo20650	CP000362	2e-131	Roseobacter denitrificans OCh 114	Bacteria
denovo20672	CP000158	3e-57	Hyphomonas neptunium ATCC 15444	Bacteria
denovo20685	CP001339	1e-55	Thioalkalivibrio sulfidophilus HL-EbGr7	Bacteria
denovo20693	CP002530	3e-19	Bacteroides salanitronis DSM 18170	Bacteria
denovo2070	CP007151	2e-52	Marinobacter sp. A3d10	Bacteria
denovo20750	CP007444	2e-92	Dyella jiangningensis	Bacteria
denovo20754	CP000083	2e-129	Colwellia psychrerythraea 34H	Bacteria
denovo20773	CP001707	8e-123	Kangiella koreensis DSM 16069	Bacteria
denovo20774	CP001339	3e-127	Thioalkalivibrio sulfidophilus HL-EbGr7	Bacteria
denovo20779	CP001339	5e-47	Thioalkalivibrio sulfidophilus HL-EbGr7	Bacteria
denovo20788	FJ899952	3e-95	Vesicomya sp. mt-II symbiont	Bacteria
denovo20801	CP003734	6e-67	Pseudomonas putida DOT-T1E	Bacteria
denovo20805	CP002976	2e-124	Phaeobacter gallaeciensis DSM 17395 = CIP 105210	Bacteria
denovo20807	CP001751	7e-60	Candidatus Puniceispirillum marinum IMCC1322	Bacteria
denovo20809	HE577327	4e-75	Azospirillum brasilense Sp245	Bacteria
denovo20820	HG966617	6e-48	bacterium Ec32	Bacteria
denovo20826	CP002209	3e-58	Ferrimonas balearica DSM 9799	Bacteria
denovo20844	FJ868209	2e-118	uncultured gamma proteobacterium	Bacteria
denovo20845	CP003740	3e-141	Octadecabacter antarcticus 307	Bacteria
denovo20846	CP000103	6e-99	Nitrosospira multiformis ATCC 25196	Bacteria
denovo20850	AE014299	5e-138	Shewanella oneidensis MR-1	Bacteria
denovo20851	CP003653	6e-08	Stanieria cyanosphaera PCC 7437	Bacteria
denovo20865	CP006966	2e-93	Phaeobacter gallaeciensis DSM 26640	Bacteria
denovo20868	FJ899953	6e-86	Vesicomya sp. endosymbiont	Bacteria
denovo20869	CP000453	4e-88	Alkalilimnicola ehrlichii MLHE-1	Bacteria
denovo20875	CP001707	6e-80	Kangiella koreensis DSM 16069	Bacteria
denovo20881	FR695877	2e-42	uncultured Desulfobacterium sp.	Bacteria
denovo20886	CP003989	2e-78	Thioalkalivibrio nitratireducens DSM 14787	Bacteria
denovo20891	CP002568	3e-96	Polymorphum gilvum SL003B-26A1	Bacteria
denovo20892	HQ692799	0.31	Moorea producens 3L	Bacteria
denovo20895	CP005990	9e-90	Spiribacter sp. UAH-SP71	Bacteria
denovo209	FR695868	6e-118	uncultured Desulfobacterium sp.	Bacteria
denovo20903	CP003538	1e-56	Micavibrio aeruginosavorus EPB	Bacteria
denovo20917	CP007451	0.33	Bacteroidetes bacterium FH5	Bacteria
denovo20932	LK391695	2e-79	Pseudomonas pseudoalcaligenes	Bacteria
denovo20950	CP003740	3e-89	Octadecabacter antarcticus 307	Bacteria
denovo20960	CP001339	4e-62	Thioalkalivibrio sulfidophilus HL-EbGr7	Bacteria
denovo20965	CP000738	3e-06	Sinorhizobium medicae WSM419	Bacteria
denovo20971	CP001339	1e-62	Thioalkalivibrio sulfidophilus HL-EbGr7	Bacteria
denovo20978	CP001322	1e-31	Desulfatibacillum alkenivorans AK-01	Bacteria
denovo20994	CP001824	1e-05	Sphaerobacter thermophilus DSM 20745	Bacteria
denovo20998	CP003989	2e-52	Thioalkalivibrio nitratireducens DSM 14787	Bacteria
denovo21	CP001339	1e-49	Thioalkalivibrio sulfidophilus HL-EbGr7	Bacteria
denovo21012	CP006912	1e-94	Hyphomicrobium nitrativorans NL23	Bacteria
denovo21030	CP005996	3e-71	Cycloclasticus zancles 7-ME	Bacteria
denovo21035	CP007030	3e-11	Thioalkalimicrobium aerophilum AL3	Bacteria
denovo21040	CP008884	6e-92	Dyella japonica A8	Bacteria
denovo21050	FO203363	1e-63	Marinobacter hydrocarbonoclasticus ATCC 49840	Bacteria
denovo21052	CP004141	0.026	Edwardsiella tarda C07-087	Bacteria
denovo21058	CP000083	1e-120	Colwellia psychrerythraea 34H	Bacteria
denovo21060	CP002018	3e-96	Ketogulonicigenium vulgare WSH-001	Bacteria
denovo21086	CP002738	7e-58	Methylomonas methanica MC09	Bacteria
denovo21088	CP000514	5e-67	Marinobacter aquaeolei VT8	Bacteria
denovo21093	EU628679	4e-19	uncultured bacterium	Bacteria
denovo21101	AP012978	6e-111	endosymbiont of unidentified scaly snail isolate Monju	Bacteria
denovo21116	CP000362	3e-84	Roseobacter denitrificans OCh 114	Bacteria
denovo21121	FJ868209	1e-49	uncultured gamma proteobacterium	Bacteria
denovo21132	CP003746	6e-99	Simiduia agarivorans SA1 = DSM 21679	Bacteria
denovo21157	CP003984	5e-106	Candidatus Planktomarina temperata RCA23	Bacteria
denovo2116	HG917972	0.34	Mycobacterium marinum E11	Bacteria
denovo21169	AP010946	8e-85	Azospirillum sp. B510	Bacteria
denovo21175	CP007236	1e-76	Ensifer adhaerens OV14	Bacteria
denovo21177	CP005960	3e-21	Pseudomonas mandelii JR-1	Bacteria
denovo21178	CP001707	2e-61	Kangiella koreensis DSM 16069	Bacteria
denovo21184	CP006773	4e-120	Leisingera methylohalidivorans DSM 14336	Bacteria
denovo21191	CP003746	9e-52	Simiduia agarivorans SA1 = DSM 21679	Bacteria
denovo2121	AP012978	5e-67	endosymbiont of unidentified scaly snail isolate Monju	Bacteria
denovo21212	CP005963	5e-62	Spiribacter salinus M19-40	Bacteria
denovo21213	CP002623	4e-75	Roseobacter litoralis Och 149	Bacteria
denovo21217	CP000680	1e-76	Pseudomonas mendocina ymp	Bacteria
denovo21223	AP012547	4e-82	Sulfuritalea hydrogenivorans sk43H	Bacteria
denovo21239	CP001339	3e-64	Thioalkalivibrio sulfidophilus HL-EbGr7	Bacteria
denovo21240	CP003653	0.0001	Stanieria cyanosphaera PCC 7437	Bacteria
denovo21243	FO203503	7e-15	Desulfobacula toluolica Tol2	Bacteria
denovo21253	CP007597	4e-75	Stenotrophomonas rhizophila	Bacteria
denovo21254	CP002568	1e-81	Polymorphum gilvum SL003B-26A1	Bacteria
denovo21260	CP002418	9e-59	Rhodopseudomonas palustris DX-1	Bacteria
denovo21269	FQ311868	4e-57	Azospirillum lipoferum 4B	Bacteria
denovo21271	CP003989	5e-74	Thioalkalivibrio nitratireducens DSM 14787	Bacteria
denovo21282	FR695865	1e-06	uncultured Desulfobacterium sp.	Bacteria
denovo21293	AE017282	6e-86	Methylococcus capsulatus str. Bath	Bacteria
denovo21299	CP001322	1e-31	Desulfatibacillum alkenivorans AK-01	Bacteria
denovo21302	AP012978	9e-84	endosymbiont of unidentified scaly snail isolate Monju	Bacteria
denovo21304	CP002198	2e-09	Cyanothece sp. PCC 7822	Bacteria
denovo21305	CP001339	7e-41	Thioalkalivibrio sulfidophilus HL-EbGr7	Bacteria
denovo21310	CP002018	1e-101	Ketogulonicigenium vulgare WSH-001	Bacteria
denovo21329	CP007151	2e-64	Marinobacter sp. A3d10	Bacteria
denovo2133	CP000514	5e-74	Marinobacter aquaeolei VT8	Bacteria
denovo21334	CP002568	4e-101	Polymorphum gilvum SL003B-26A1	Bacteria
denovo21342	AP012978	2e-118	endosymbiont of unidentified scaly snail isolate Monju	Bacteria
denovo21351	CP002858	1.1	Flexistipes sinusarabici DSM 4947	Bacteria
denovo21354	CP003242	6e-86	Vibrio sp. EJY3	Bacteria
denovo21360	AP012978	1e-45	endosymbiont of unidentified scaly snail isolate Monju	Bacteria
denovo21365	CP008696	2e-92	Pseudomonas chlororaphis	Bacteria
denovo21366	CP003746	6e-105	Simiduia agarivorans SA1 = DSM 21679	Bacteria
denovo21388	CP000514	3e-76	Marinobacter aquaeolei VT8	Bacteria
denovo21393	CP001701	4e-06	Cyanothece sp. PCC 8802	Bacteria
denovo21394	CP000680	7e-72	Pseudomonas mendocina ymp	Bacteria
denovo21395	AP012547	3e-57	Sulfuritalea hydrogenivorans sk43H	Bacteria
denovo21403	CP000362	3e-141	Roseobacter denitrificans OCh 114	Bacteria
denovo21424	CP002382	1e-70	Micavibrio aeruginosavorus ARL-13	Bacteria
denovo21447	AE017282	1e-87	Methylococcus capsulatus str. Bath	Bacteria
denovo21453	CP002976	2e-97	Phaeobacter gallaeciensis DSM 17395 = CIP 105210	Bacteria
denovo21460	CP000450	0.2	Nitrosomonas eutropha C91	Bacteria
denovo21466	CP007151	3e-48	Marinobacter sp. A3d10	Bacteria
denovo21471	AP012547	8e-97	Sulfuritalea hydrogenivorans sk43H	Bacteria
denovo21494	AP012978	6e-124	endosymbiont of unidentified scaly snail isolate Monju	Bacteria
denovo21523	FJ868208	3e-121	uncultured gamma proteobacterium	Bacteria
denovo21528	CP002568	1e-75	Polymorphum gilvum SL003B-26A1	Bacteria
denovo21532	CP001339	5e-144	Thioalkalivibrio sulfidophilus HL-EbGr7	Bacteria
denovo21557	CP001707	1e-56	Kangiella koreensis DSM 16069	Bacteria
denovo2156	CP002623	3e-108	Roseobacter litoralis Och 149	Bacteria
denovo21577	FJ868209	8e-53	uncultured gamma proteobacterium	Bacteria
denovo21578	CP001707	3e-70	Kangiella koreensis DSM 16069	Bacteria
denovo21580	CP000127	5e-05	Nitrosococcus oceani ATCC 19707	Bacteria
denovo21582	CP000680	4e-74	Pseudomonas mendocina ymp	Bacteria
denovo21583	CP002623	5e-106	Roseobacter litoralis Och 149	Bacteria
denovo21586	BX294156	2e-29	Rhodopirellula baltica SH 1	Bacteria
denovo21588	CP002568	1e-81	Polymorphum gilvum SL003B-26A1	Bacteria
denovo21591	FN650140	3e-77	Legionella longbeachae NSW150	Bacteria
denovo21594	AE017282	3e-84	Methylococcus capsulatus str. Bath	Bacteria
denovo21595	CP003725	7e-98	Pseudomonas stutzeri DSM 10701	Bacteria
denovo21610	AP012549	0.007	cyanobacterium endosymbiont of Epithemia turgida isolate ETSB Lake Yunoko	Bacteria
denovo21613	CP002552	1e-144	Nitrosomonas sp. AL212	Bacteria
denovo21636	CP005990	9e-78	Spiribacter sp. UAH-SP71	Bacteria
denovo21644	CP000875	8e-15	Herpetosiphon aurantiacus DSM 785	Bacteria
denovo21648	CP008884	1e-74	Dyella japonica A8	Bacteria
denovo21655	FJ868209	3e-96	uncultured gamma proteobacterium	Bacteria
denovo21658	CP002157	1e-132	Maribacter sp. HTCC2170	Bacteria
denovo21660	CP000362	1e-55	Roseobacter denitrificans OCh 114	Bacteria
denovo21672	CP007619	0.051	Bacteroides dorei	Bacteria
denovo21678	CP002568	3e-102	Polymorphum gilvum SL003B-26A1	Bacteria
denovo21690	CP006966	5e-119	Phaeobacter gallaeciensis DSM 26640	Bacteria
denovo21693	CP000116	2e-08	Thiobacillus denitrificans ATCC 25259	Bacteria
denovo21697	CP000282	1e-68	Saccharophagus degradans 2-40	Bacteria
denovo21703	CP000284	3.2	Methylobacillus flagellatus KT	Bacteria
denovo21705	FO538765	3e-07	Magnetospira sp. QH-2	Bacteria
denovo21710	CP006966	2e-104	Phaeobacter gallaeciensis DSM 26640	Bacteria
denovo21715	CP003740	4e-88	Octadecabacter antarcticus 307	Bacteria
denovo2172	CP002876	5e-119	Nitrosomonas sp. Is79A3	Bacteria
denovo21733	CP000282	1e-133	Saccharophagus degradans 2-40	Bacteria
denovo21734	CP005990	8e-72	Spiribacter sp. UAH-SP71	Bacteria
denovo21744	CP000859	1e-88	Desulfococcus oleovorans Hxd3	Bacteria
denovo21745	CP003989	6e-92	Thioalkalivibrio nitratireducens DSM 14787	Bacteria
denovo21755	CP002352	3.8	Bacteroides helcogenes P 36-108	Bacteria
denovo21766	CP002738	1e-89	Methylomonas methanica MC09	Bacteria
denovo21772	AP012206	2e-41	Bradyrhizobium japonicum USDA 6	Bacteria
denovo21784	CP000514	9e-71	Marinobacter aquaeolei VT8	Bacteria
denovo21787	CP003989	3e-70	Thioalkalivibrio nitratireducens DSM 14787	Bacteria
denovo21791	CP000158	1e-50	Hyphomonas neptunium ATCC 15444	Bacteria
denovo21807	FQ311868	3e-77	Azospirillum lipoferum 4B	Bacteria
denovo21813	CP002623	4e-68	Roseobacter litoralis Och 149	Bacteria
denovo21833	AP013068	3e-64	Pseudomonas resinovorans NBRC 106553	Bacteria
denovo21849	CP001339	2e-46	Thioalkalivibrio sulfidophilus HL-EbGr7	Bacteria
denovo21854	CP001339	4e-56	Thioalkalivibrio sulfidophilus HL-EbGr7	Bacteria
denovo21869	FP929038	5e-11	Coprococcus catus GD/7	Bacteria
denovo21874	CP002479	2e-23	Geobacter sp. M18	Bacteria
denovo21875	CP002568	4e-50	Polymorphum gilvum SL003B-26A1	Bacteria
denovo21882	CP001707	5e-80	Kangiella koreensis DSM 16069	Bacteria
denovo21885	CP005990	3e-77	Spiribacter sp. UAH-SP71	Bacteria
denovo21888	AP012978	4e-145	endosymbiont of unidentified scaly snail isolate Monju	Bacteria
denovo21890	CP003734	1e-40	Pseudomonas putida DOT-T1E	Bacteria
denovo21891	CP000859	1e-94	Desulfococcus oleovorans Hxd3	Bacteria
denovo2190	CP001707	1e-68	Kangiella koreensis DSM 16069	Bacteria
denovo21902	FJ868209	6e-149	uncultured gamma proteobacterium	Bacteria
denovo21907	CP001339	3e-153	Thioalkalivibrio sulfidophilus HL-EbGr7	Bacteria
denovo21923	CP004885	0.025	Comamonadaceae bacterium CR	Bacteria
denovo2193	AP014582	1e-06	Bordetella bronchiseptica	Bacteria
denovo21936	CP000859	5e-17	Desulfococcus oleovorans Hxd3	Bacteria
denovo21946	CP008696	6e-105	Pseudomonas chlororaphis	Bacteria
denovo21948	AP012978	3e-127	endosymbiont of unidentified scaly snail isolate Monju	Bacteria
denovo21954	CP002976	6e-137	Phaeobacter gallaeciensis DSM 17395 = CIP 105210	Bacteria
denovo21964	CP000282	1e-87	Saccharophagus degradans 2-40	Bacteria
denovo21969	FN557490	0.0006	Listeria seeligeri serovar 1/2b str. SLCC3954	Bacteria
denovo2197	CP001339	9e-27	Thioalkalivibrio sulfidophilus HL-EbGr7	Bacteria
denovo21982	CP000514	1e-61	Marinobacter aquaeolei VT8	Bacteria
denovo21997	CP000830	6e-86	Dinoroseobacter shibae DFL 12	Bacteria
denovo220	CP001339	1e-145	Thioalkalivibrio sulfidophilus HL-EbGr7	Bacteria
denovo22006	CP001339	1e-114	Thioalkalivibrio sulfidophilus HL-EbGr7	Bacteria
denovo22014	CP000158	4e-56	Hyphomonas neptunium ATCC 15444	Bacteria
denovo22016	LK391695	5e-68	Pseudomonas pseudoalcaligenes	Bacteria
denovo22026	CP003989	1e-94	Thioalkalivibrio nitratireducens DSM 14787	Bacteria
denovo22033	AE017282	5e-80	Methylococcus capsulatus str. Bath	Bacteria
denovo22040	FQ311868	8e-91	Azospirillum lipoferum 4B	Bacteria
denovo22043	CP005963	4e-75	Spiribacter salinus M19-40	Bacteria
denovo2205	CP000239	0.33	Synechococcus sp. JA-3-3Ab	Bacteria
denovo22056	AP012978	6e-10	endosymbiont of unidentified scaly snail isolate Monju	Bacteria
denovo22057	CP000478	7e-67	Syntrophobacter fumaroxidans MPOB	Bacteria
denovo2207	CP001707	2e-59	Kangiella koreensis DSM 16069	Bacteria
denovo22079	CP000680	3e-69	Pseudomonas mendocina ymp	Bacteria
denovo22092	CP002209	1e-76	Ferrimonas balearica DSM 9799	Bacteria
denovo22094	CP000680	7e-45	Pseudomonas mendocina ymp	Bacteria
denovo22097	CP001796	0.15	Pseudoalteromonas sp. SM9913	Bacteria
denovo22120	CP003984	4e-107	Candidatus Planktomarina temperata RCA23	Bacteria
denovo22128	AP012547	2e-98	Sulfuritalea hydrogenivorans sk43H	Bacteria
denovo22129	CP001339	2e-156	Thioalkalivibrio sulfidophilus HL-EbGr7	Bacteria
denovo22140	AP013068	7e-72	Pseudomonas resinovorans NBRC 106553	Bacteria
denovo22143	CP001074	3e-109	Rhizobium etli CIAT 652	Bacteria
denovo22153	CP001339	4e-50	Thioalkalivibrio sulfidophilus HL-EbGr7	Bacteria
denovo22156	AP009247	5e-42	Candidatus Vesicomyosocius okutanii HA	Bacteria
denovo22175	FJ868209	6e-105	uncultured gamma proteobacterium	Bacteria
denovo22178	CP003345	7e-29	Flexibacter litoralis DSM 6794	Bacteria
denovo22194	KC407996	1e-06	Nostoc sp. 'Peltigera membranacea cyanobiont'	Bacteria
denovo22213	FJ868209	1e-42	uncultured gamma proteobacterium	Bacteria
denovo22223	CP001339	7e-45	Thioalkalivibrio sulfidophilus HL-EbGr7	Bacteria
denovo22225	CP001339	2e-47	Thioalkalivibrio sulfidophilus HL-EbGr7	Bacteria
denovo22235	CP003845	1e-49	Alteromonas macleodii str. 'Black Sea 11'	Bacteria
denovo22267	FM954973	0	Vibrio splendidus LGP32	Bacteria
denovo22270	CP006606	2e-92	Vibrio campbellii ATCC BAA-1116	Bacteria
denovo22300	CP006773	1e-121	Leisingera methylohalidivorans DSM 14336	Bacteria
denovo22308	CP002209	3e-69	Ferrimonas balearica DSM 9799	Bacteria
denovo2231	CP003740	9e-122	Octadecabacter antarcticus 307	Bacteria
denovo22312	CP000680	2e-79	Pseudomonas mendocina ymp	Bacteria
denovo22314	FJ899959	5e-81	Vesicomya sp. mt-I symbiont	Bacteria
denovo22317	CP005963	3e-84	Spiribacter salinus M19-40	Bacteria
denovo22318	CP002819	1.1	Ralstonia solanacearum Po82	Bacteria
denovo2233	AP012978	9e-103	endosymbiont of unidentified scaly snail isolate Monju	Bacteria
denovo22330	CP002683	7e-15	Thermodesulfatator indicus DSM 15286	Bacteria
denovo22341	CP001339	6e-105	Thioalkalivibrio sulfidophilus HL-EbGr7	Bacteria
denovo22392	FJ868209	2e-142	uncultured gamma proteobacterium	Bacteria
denovo224	CP003989	6e-73	Thioalkalivibrio nitratireducens DSM 14787	Bacteria
denovo2240	AP014583	4e-76	Winogradskyella sp. PG-2	Bacteria
denovo22400	CP002447	2e-78	Mesorhizobium ciceri biovar biserrulae WSM1271	Bacteria
denovo22405	CP000319	3e-65	Nitrobacter hamburgensis X14	Bacteria
denovo22411	CP003147	1e-94	Pseudovibrio sp. FO-BEG1	Bacteria
denovo22420	CP006912	7e-79	Hyphomicrobium nitrativorans NL23	Bacteria
denovo2243	CP000142	9e-21	Pelobacter carbinolicus DSM 2380	Bacteria
denovo22434	CP005996	2e-99	Cycloclasticus zancles 7-ME	Bacteria
denovo22441	AE017282	3e-83	Methylococcus capsulatus str. Bath	Bacteria
denovo22455	CP003984	0	Candidatus Planktomarina temperata RCA23	Bacteria
denovo22462	CP007444	2e-80	Dyella jiangningensis	Bacteria
denovo22465	CP002881	4e-107	Pseudomonas stutzeri ATCC 17588 = LMG 11199	Bacteria
denovo22471	CP000453	5e-93	Alkalilimnicola ehrlichii MLHE-1	Bacteria
denovo22474	CP002568	7e-98	Polymorphum gilvum SL003B-26A1	Bacteria
denovo22480	CP007441	3e-89	Pseudomonas stutzeri	Bacteria
denovo2249	AP012547	2e-92	Sulfuritalea hydrogenivorans sk43H	Bacteria
denovo22499	KF521924	4e-88	deep-sea mussel NZ3 thioautotrophic gill symbiont	Bacteria
denovo22508	JF745537	2e-72	Pseudomonas syringae	Bacteria
denovo22513	HG966617	5e-68	bacterium Ec32	Bacteria
denovo22515	CP003989	7e-66	Thioalkalivibrio nitratireducens DSM 14787	Bacteria
denovo22544	CP000830	1e-82	Dinoroseobacter shibae DFL 12	Bacteria
denovo22545	CP002738	2e-98	Methylomonas methanica MC09	Bacteria
denovo22559	CP007152	2e-67	Marinobacter sp. R9SW1	Bacteria
denovo22560	CP007151	6e-51	Marinobacter sp. A3d10	Bacteria
denovo22581	CP007152	5e-74	Marinobacter sp. R9SW1	Bacteria
denovo22595	CP000514	4e-62	Marinobacter aquaeolei VT8	Bacteria
denovo22625	AP013068	2e-66	Pseudomonas resinovorans NBRC 106553	Bacteria
denovo22640	AP013068	3e-84	Pseudomonas resinovorans NBRC 106553	Bacteria
denovo22660	CP002972	4e-94	Phaeobacter gallaeciensis 2.10	Bacteria
denovo22664	CP000472	1e-62	Shewanella piezotolerans WP3	Bacteria
denovo22678	CP003989	1e-95	Thioalkalivibrio nitratireducens DSM 14787	Bacteria
denovo22681	CP003740	1e-132	Octadecabacter antarcticus 307	Bacteria
denovo22684	CP002770	2e-15	Desulfotomaculum kuznetsovii DSM 6115	Bacteria
denovo22685	CP000960	0.089	Burkholderia cenocepacia MC0-3	Bacteria
denovo22689	FJ868209	3e-102	uncultured gamma proteobacterium	Bacteria
denovo22695	CP002365	0.018	Lactococcus lactis subsp. lactis CV56	Bacteria
denovo2270	AP012978	1e-69	endosymbiont of unidentified scaly snail isolate Monju	Bacteria
denovo22708	CP000304	3e-83	Pseudomonas stutzeri A1501	Bacteria
denovo22709	CP001322	5e-12	Desulfatibacillum alkenivorans AK-01	Bacteria
denovo22721	CP000083	3e-56	Colwellia psychrerythraea 34H	Bacteria
denovo2273	CP001339	2e-54	Thioalkalivibrio sulfidophilus HL-EbGr7	Bacteria
denovo22733	AE017282	7e-79	Methylococcus capsulatus str. Bath	Bacteria
denovo22743	CP001339	7e-142	Thioalkalivibrio sulfidophilus HL-EbGr7	Bacteria
denovo22745	CP003984	4e-114	Candidatus Planktomarina temperata RCA23	Bacteria
denovo22746	CP007151	7e-71	Marinobacter sp. A3d10	Bacteria
denovo2275	AP009247	3e-65	Candidatus Vesicomyosocius okutanii HA	Bacteria
denovo22752	CP003989	1e-75	Thioalkalivibrio nitratireducens DSM 14787	Bacteria
denovo22759	CP001339	8e-44	Thioalkalivibrio sulfidophilus HL-EbGr7	Bacteria
denovo2276	FJ899953	2e-97	Vesicomya sp. endosymbiont	Bacteria
denovo22761	HG966617	3e-70	bacterium Ec32	Bacteria
denovo22783	CP005963	9e-84	Spiribacter salinus M19-40	Bacteria
denovo22784	CP001707	4e-69	Kangiella koreensis DSM 16069	Bacteria
denovo22791	CP003734	2e-65	Pseudomonas putida DOT-T1E	Bacteria
denovo22819	CP003989	5e-100	Thioalkalivibrio nitratireducens DSM 14787	Bacteria
denovo22824	CP003989	1e-95	Thioalkalivibrio nitratireducens DSM 14787	Bacteria
denovo22826	FJ899949	3e-83	Calyptogena kilmeri gill symbiont	Bacteria
denovo22827	CP000514	3e-71	Marinobacter aquaeolei VT8	Bacteria
denovo2283	CP003725	5e-119	Pseudomonas stutzeri DSM 10701	Bacteria
denovo22830	CP000362	9e-97	Roseobacter denitrificans OCh 114	Bacteria
denovo22832	CP006579	3e-83	Aeromonas hydrophila 4AK4	Bacteria
denovo22836	CP002059	0.0004	'Nostoc azollae' 0708	Bacteria
denovo22861	FJ868208	7e-85	uncultured gamma proteobacterium	Bacteria
denovo22866	CP001707	6e-54	Kangiella koreensis DSM 16069	Bacteria
denovo22869	CP007569	1e-69	Bradyrhizobium japonicum SEMIA 5079	Bacteria
denovo2287	FJ868209	2e-92	uncultured gamma proteobacterium	Bacteria
denovo22872	CP000155	4e-82	Hahella chejuensis KCTC 2396	Bacteria
denovo22873	CP003989	6e-92	Thioalkalivibrio nitratireducens DSM 14787	Bacteria
denovo22905	CP003740	6e-131	Octadecabacter antarcticus 307	Bacteria
denovo22906	FP565575	8e-09	Candidatus Methylomirabilis oxyfera	Bacteria
denovo22908	CP000698	1e-12	Geobacter uraniireducens Rf4	Bacteria
denovo22911	CP003653	9e-06	Stanieria cyanosphaera PCC 7437	Bacteria
denovo22914	CP000680	1e-75	Pseudomonas mendocina ymp	Bacteria
denovo22915	CP005996	8e-78	Cycloclasticus zancles 7-ME	Bacteria
denovo22917	CP000155	1e-89	Hahella chejuensis KCTC 2396	Bacteria
denovo22919	CP001339	7e-60	Thioalkalivibrio sulfidophilus HL-EbGr7	Bacteria
denovo22921	CP002976	1e-120	Phaeobacter gallaeciensis DSM 17395 = CIP 105210	Bacteria
denovo22927	AP012337	2e-15	Caldilinea aerophila DSM 14535 = NBRC 104270	Bacteria
denovo22938	AP012978	2e-39	endosymbiont of unidentified scaly snail isolate Monju	Bacteria
denovo22945	CP003746	9e-97	Simiduia agarivorans SA1 = DSM 21679	Bacteria
denovo22946	CP001707	1e-63	Kangiella koreensis DSM 16069	Bacteria
denovo2295	CP000830	7e-117	Dinoroseobacter shibae DFL 12	Bacteria
denovo22959	CP002305	3e-15	Leadbetterella byssophila DSM 17132	Bacteria
denovo22982	CP001339	9e-46	Thioalkalivibrio sulfidophilus HL-EbGr7	Bacteria
denovo22983	CP008896	1e-47	Pseudomonas fluorescens	Bacteria
denovo22991	CP001339	3e-57	Thioalkalivibrio sulfidophilus HL-EbGr7	Bacteria
denovo22999	FP476056	4e-15	Zobellia galactanivorans	Bacteria
denovo23	CP003653	9e-58	Stanieria cyanosphaera PCC 7437	Bacteria
denovo23004	CP000472	6e-67	Shewanella piezotolerans WP3	Bacteria
denovo23009	CP002026	2e-54	Starkeya novella DSM 506	Bacteria
denovo23015	KF521920	2e-60	Bathymodiolus aff. brevior thioautotrophic gill symbiont	Bacteria
denovo23016	CP001339	6e-72	Thioalkalivibrio sulfidophilus HL-EbGr7	Bacteria
denovo23024	CP000514	4e-69	Marinobacter aquaeolei VT8	Bacteria
denovo23032	AP012547	2e-85	Sulfuritalea hydrogenivorans sk43H	Bacteria
denovo23035	CP006852	0.002	Pseudomonas sp. TKP	Bacteria
denovo23043	CP001339	1e-76	Thioalkalivibrio sulfidophilus HL-EbGr7	Bacteria
denovo23049	FJ868209	2e-91	uncultured gamma proteobacterium	Bacteria
denovo23069	CP006912	3e-102	Hyphomicrobium nitrativorans NL23	Bacteria
denovo23084	CP001291	1e-19	Cyanothece sp. PCC 7424	Bacteria
denovo2309	AP012337	3e-08	Caldilinea aerophila DSM 14535 = NBRC 104270	Bacteria
denovo23108	CP000830	5e-100	Dinoroseobacter shibae DFL 12	Bacteria
denovo23109	FR695868	4e-24	uncultured Desulfobacterium sp.	Bacteria
denovo23113	AP013070	3e-71	Pseudomonas putida NBRC 14164	Bacteria
denovo23114	CP007152	2e-97	Marinobacter sp. R9SW1	Bacteria
denovo23115	CP001390	1.1	Geobacter daltonii FRC-32	Bacteria
denovo23122	CP002568	3e-89	Polymorphum gilvum SL003B-26A1	Bacteria
denovo23129	CP001339	6e-22	Thioalkalivibrio sulfidophilus HL-EbGr7	Bacteria
denovo23145	CP001197	0.007	Desulfovibrio vulgaris str. 'Miyazaki F'	Bacteria
denovo23152	FJ899951	4e-69	Ectenagena extenta gill symbiont	Bacteria
denovo23170	CP003734	1e-55	Pseudomonas putida DOT-T1E	Bacteria
denovo23173	CP000514	2e-65	Marinobacter aquaeolei VT8	Bacteria
denovo23176	AP012978	1e-62	endosymbiont of unidentified scaly snail isolate Monju	Bacteria
denovo23182	CP007444	8e-78	Dyella jiangningensis	Bacteria
denovo23198	CT573326	6e-111	Pseudomonas entomophila L48	Bacteria
denovo23201	CP005990	2e-74	Spiribacter sp. UAH-SP71	Bacteria
denovo23209	CP005963	4e-76	Spiribacter salinus M19-40	Bacteria
denovo23214	CP000830	2e-112	Dinoroseobacter shibae DFL 12	Bacteria
denovo23215	AP012547	5e-80	Sulfuritalea hydrogenivorans sk43H	Bacteria
denovo23217	CP000661	4e-88	Rhodobacter sphaeroides ATCC 17025	Bacteria
denovo23219	AP012547	1e-76	Sulfuritalea hydrogenivorans sk43H	Bacteria
denovo23221	CP002620	4e-69	Pseudomonas mendocina NK-01	Bacteria
denovo23222	CP006682	0.32	Spiroplasma apis B31	Bacteria
denovo23231	CP000680	1e-82	Pseudomonas mendocina ymp	Bacteria
denovo23234	CP007152	5e-68	Marinobacter sp. R9SW1	Bacteria
denovo23241	CP003984	1e-73	Candidatus Planktomarina temperata RCA23	Bacteria
denovo23247	CP003740	6e-150	Octadecabacter antarcticus 307	Bacteria
denovo23248	AP012547	9e-109	Sulfuritalea hydrogenivorans sk43H	Bacteria
denovo23251	CP003630	0.88	Microcoleus sp. PCC 7113	Bacteria
denovo23256	LK391695	5e-68	Pseudomonas pseudoalcaligenes	Bacteria
denovo2326	CP002382	8e-53	Micavibrio aeruginosavorus ARL-13	Bacteria
denovo23262	CP001707	2e-80	Kangiella koreensis DSM 16069	Bacteria
denovo23272	CP003418	1e-56	Ignavibacterium album JCM 16511	Bacteria
denovo23279	CP002623	2e-105	Roseobacter litoralis Och 149	Bacteria
denovo23285	CP004140	6e-118	Sinorhizobium meliloti 2011	Bacteria
denovo23287	BA000012	7e-104	Mesorhizobium loti MAFF303099	Bacteria
denovo23291	CP006912	4e-94	Hyphomicrobium nitrativorans NL23	Bacteria
denovo23297	CP003740	2e-105	Octadecabacter antarcticus 307	Bacteria
denovo23318	CP003734	2e-67	Pseudomonas putida DOT-T1E	Bacteria
denovo23330	CP002568	1e-76	Polymorphum gilvum SL003B-26A1	Bacteria
denovo23331	CP002568	3e-65	Polymorphum gilvum SL003B-26A1	Bacteria
denovo23332	AP012547	4e-76	Sulfuritalea hydrogenivorans sk43H	Bacteria
denovo23367	CP000453	6e-80	Alkalilimnicola ehrlichii MLHE-1	Bacteria
denovo23370	HG966617	9e-71	bacterium Ec32	Bacteria
denovo23377	CP005990	4e-94	Spiribacter sp. UAH-SP71	Bacteria
denovo23392	FJ868209	9e-58	uncultured gamma proteobacterium	Bacteria
denovo23401	FQ958211	1e-76	Legionella pneumophila subsp. pneumophila	Bacteria
denovo23409	CP000514	2e-59	Marinobacter aquaeolei VT8	Bacteria
denovo23410	CP005963	8e-91	Spiribacter salinus M19-40	Bacteria
denovo23419	CP003989	1e-75	Thioalkalivibrio nitratireducens DSM 14787	Bacteria
denovo23420	HG315671	2e-35	Formosa agariphila KMM 3901	Bacteria
denovo23431	CP000661	6e-86	Rhodobacter sphaeroides ATCC 17025	Bacteria
denovo23433	CP002976	5e-119	Phaeobacter gallaeciensis DSM 17395 = CIP 105210	Bacteria
denovo23438	CP003989	1e-89	Thioalkalivibrio nitratireducens DSM 14787	Bacteria
denovo23439	CP008884	2e-74	Dyella japonica A8	Bacteria
denovo23444	CP000680	3e-103	Pseudomonas mendocina ymp	Bacteria
denovo23447	CP002961	0.007	Emticicia oligotrophica DSM 17448	Bacteria
denovo23448	CP000362	6e-86	Roseobacter denitrificans OCh 114	Bacteria
denovo23458	CP005095	4e-75	Azotobacter vinelandii CA6	Bacteria
denovo2346	CP007045	5e-106	Rhizobium leguminosarum bv. trifolii WSM1689	Bacteria
denovo23465	CP000552	0.31	Prochlorococcus marinus str. MIT 9515	Bacteria
denovo23473	CP000158	5e-55	Hyphomonas neptunium ATCC 15444	Bacteria
denovo2348	CP000362	1e-100	Roseobacter denitrificans OCh 114	Bacteria
denovo23491	CP001614	2e-67	Teredinibacter turnerae T7901	Bacteria
denovo23514	EU696576	0.025	uncultured bacterium	Bacteria
denovo23534	CP007151	2e-60	Marinobacter sp. A3d10	Bacteria
denovo23552	CP001339	6e-162	Thioalkalivibrio sulfidophilus HL-EbGr7	Bacteria
denovo23555	AP013070	1e-69	Pseudomonas putida NBRC 14164	Bacteria
denovo23559	FJ868209	3e-109	uncultured gamma proteobacterium	Bacteria
denovo23562	CP000155	2e-66	Hahella chejuensis KCTC 2396	Bacteria
denovo23566	CP000103	2e-85	Nitrosospira multiformis ATCC 25196	Bacteria
denovo23571	CP003563	4e-06	Sinorhizobium fredii USDA 257	Bacteria
denovo23574	AP012978	8e-78	endosymbiont of unidentified scaly snail isolate Monju	Bacteria
denovo2358	CP001339	6e-42	Thioalkalivibrio sulfidophilus HL-EbGr7	Bacteria
denovo23588	CP002620	9e-76	Pseudomonas mendocina NK-01	Bacteria
denovo23595	FJ868208	1e-100	uncultured gamma proteobacterium	Bacteria
denovo23598	CP000362	2e-72	Roseobacter denitrificans OCh 114	Bacteria
denovo23610	HG966617	2e-97	bacterium Ec32	Bacteria
denovo23611	CP003093	1e-81	Pseudoxanthomonas spadix BD-a59	Bacteria
denovo23612	AE017282	9e-84	Methylococcus capsulatus str. Bath	Bacteria
denovo23613	LK391695	5e-55	Pseudomonas pseudoalcaligenes	Bacteria
denovo23623	CP000319	2e-42	Nitrobacter hamburgensis X14	Bacteria
denovo23625	CP002568	1e-108	Polymorphum gilvum SL003B-26A1	Bacteria
denovo23629	CP000744	1e-49	Pseudomonas aeruginosa PA7	Bacteria
denovo23630	CP002511	5e-56	Candidatus Pelagibacter sp. IMCC9063	Bacteria
denovo23648	CP000680	3e-84	Pseudomonas mendocina ymp	Bacteria
denovo23651	AP012978	1e-17	endosymbiont of unidentified scaly snail isolate Monju	Bacteria
denovo23657	CP006773	2e-72	Leisingera methylohalidivorans DSM 14336	Bacteria
denovo23659	CP002972	1e-126	Phaeobacter gallaeciensis 2.10	Bacteria
denovo23660	HG938355	1e-113	Rhizobium galegae bv. officinalis str. HAMBI 1141	Bacteria
denovo23661	CP003984	4e-107	Candidatus Planktomarina temperata RCA23	Bacteria
denovo23676	CP001052	0.0004	Burkholderia phytofirmans PsJN	Bacteria
denovo23682	CP002620	3e-70	Pseudomonas mendocina NK-01	Bacteria
denovo23708	CP003989	7e-91	Thioalkalivibrio nitratireducens DSM 14787	Bacteria
denovo23711	FN554889	0.025	Streptomyces scabiei 87.22	Bacteria
denovo23725	CP007152	6e-74	Marinobacter sp. R9SW1	Bacteria
denovo2373	CP001707	2e-61	Kangiella koreensis DSM 16069	Bacteria
denovo23737	CP003734	3e-57	Pseudomonas putida DOT-T1E	Bacteria
denovo23772	CP001339	9e-59	Thioalkalivibrio sulfidophilus HL-EbGr7	Bacteria
denovo23785	FJ868209	6e-86	uncultured gamma proteobacterium	Bacteria
denovo23795	CP008876	3e-06	Terribacillus aidingensis	Bacteria
denovo23798	CP002623	8e-110	Roseobacter litoralis Och 149	Bacteria
denovo23808	KF521924	1e-68	deep-sea mussel NZ3 thioautotrophic gill symbiont	Bacteria
denovo23814	CP001339	2e-54	Thioalkalivibrio sulfidophilus HL-EbGr7	Bacteria
denovo23821	CP003740	3e-115	Octadecabacter antarcticus 307	Bacteria
denovo23822	CP002738	4e-81	Methylomonas methanica MC09	Bacteria
denovo23823	CP000083	4e-152	Colwellia psychrerythraea 34H	Bacteria
denovo23830	FJ868209	6e-86	uncultured gamma proteobacterium	Bacteria
denovo23834	CP000157	2e-112	Erythrobacter litoralis HTCC2594	Bacteria
denovo23854	CP000155	2e-104	Hahella chejuensis KCTC 2396	Bacteria
denovo23865	CP002623	3e-140	Roseobacter litoralis Och 149	Bacteria
denovo23868	CP002382	3e-58	Micavibrio aeruginosavorus ARL-13	Bacteria
denovo2387	CP007067	1e-95	Rhizobium leguminosarum bv. trifolii CB782	Bacteria
denovo23873	FJ868209	5e-106	uncultured gamma proteobacterium	Bacteria
denovo23889	CP000377	7e-09	Ruegeria sp. TM1040	Bacteria
denovo23892	CP006773	3e-115	Leisingera methylohalidivorans DSM 14336	Bacteria
denovo23893	FJ868209	1e-57	uncultured gamma proteobacterium	Bacteria
denovo23905	FJ868209	8e-91	uncultured gamma proteobacterium	Bacteria
denovo23907	LK391695	5e-74	Pseudomonas pseudoalcaligenes	Bacteria
denovo23908	CP001629	1e-62	Desulfomicrobium baculatum DSM 4028	Bacteria
denovo23911	CP002378	2e-43	Vibrio furnissii NCTC 11218	Bacteria
denovo23928	CP001614	8e-91	Teredinibacter turnerae T7901	Bacteria
denovo23936	FQ311868	1e-87	Azospirillum lipoferum 4B	Bacteria
denovo2394	CP007793	3e-46	Azospirillum brasilense	Bacteria
denovo23948	KC795520	0.094	Haemophilus parasuis	Bacteria
denovo23961	CP001339	1e-92	Thioalkalivibrio sulfidophilus HL-EbGr7	Bacteria
denovo23965	AP012978	2e-118	endosymbiont of unidentified scaly snail isolate Monju	Bacteria
denovo23970	CP001032	6e-29	Opitutus terrae PB90-1	Bacteria
denovo23979	CP001339	3e-121	Thioalkalivibrio sulfidophilus HL-EbGr7	Bacteria
denovo24	CP000680	3e-58	Pseudomonas mendocina ymp	Bacteria
denovo2400	CP000083	1e-120	Colwellia psychrerythraea 34H	Bacteria
denovo24007	CP002976	2e-111	Phaeobacter gallaeciensis DSM 17395 = CIP 105210	Bacteria
denovo24017	CP000830	7e-117	Dinoroseobacter shibae DFL 12	Bacteria
denovo24029	CP000489	1e-101	Paracoccus denitrificans PD1222	Bacteria
denovo24043	CP008739	4e-94	Pseudomonas aeruginosa VRFPA04	Bacteria
denovo24059	CP002209	3e-71	Ferrimonas balearica DSM 9799	Bacteria
denovo24066	CP002157	4e-114	Maribacter sp. HTCC2170	Bacteria
denovo24085	CP002620	2e-105	Pseudomonas mendocina NK-01	Bacteria
denovo24103	CP001339	3e-70	Thioalkalivibrio sulfidophilus HL-EbGr7	Bacteria
denovo24108	AP013068	3e-76	Pseudomonas resinovorans NBRC 106553	Bacteria
denovo2411	CP000083	7e-130	Colwellia psychrerythraea 34H	Bacteria
denovo2412	CP003653	3e-77	Stanieria cyanosphaera PCC 7437	Bacteria
denovo24122	CP000828	9e-08	Acaryochloris marina MBIC11017	Bacteria
denovo24149	LK391695	2e-85	Pseudomonas pseudoalcaligenes	Bacteria
denovo24158	AP012547	1e-95	Sulfuritalea hydrogenivorans sk43H	Bacteria
denovo24164	CP001707	6e-73	Kangiella koreensis DSM 16069	Bacteria
denovo24167	CP003738	6e-80	Pseudomonas putida HB3267	Bacteria
denovo2418	CP003938	0.3	Enterobacteriaceae bacterium strain FGI 57	Bacteria
denovo24198	AP014622	1e-54	Pseudomonas aeruginosa	Bacteria
denovo242	FQ311868	3e-84	Azospirillum lipoferum 4B	Bacteria
denovo24219	CP000830	3e-103	Dinoroseobacter shibae DFL 12	Bacteria
denovo24227	AP013070	3e-83	Pseudomonas putida NBRC 14164	Bacteria
denovo24229	CP000362	3e-102	Roseobacter denitrificans OCh 114	Bacteria
denovo24231	CP001707	1e-68	Kangiella koreensis DSM 16069	Bacteria
denovo24233	CP001147	6e-23	Thermodesulfovibrio yellowstonii DSM 11347	Bacteria
denovo24243	CP002568	9e-84	Polymorphum gilvum SL003B-26A1	Bacteria
denovo24244	CP007152	8e-78	Marinobacter sp. R9SW1	Bacteria
denovo24260	CP000158	3e-40	Hyphomonas neptunium ATCC 15444	Bacteria
denovo24263	CP002623	4e-165	Roseobacter litoralis Och 149	Bacteria
denovo24271	AE017282	3e-77	Methylococcus capsulatus str. Bath	Bacteria
denovo24285	CP002738	2e-79	Methylomonas methanica MC09	Bacteria
denovo2430	CP005996	7e-79	Cycloclasticus zancles 7-ME	Bacteria
denovo2432	FJ868208	1e-87	uncultured gamma proteobacterium	Bacteria
denovo2433	CP003740	6e-112	Octadecabacter antarcticus 307	Bacteria
denovo24330	CP000084	5e-126	Candidatus Pelagibacter ubique HTCC1062	Bacteria
denovo24335	CP003740	5e-106	Octadecabacter antarcticus 307	Bacteria
denovo2434	CP000830	2e-98	Dinoroseobacter shibae DFL 12	Bacteria
denovo24367	JX875537	0.0003	uncultured bacterium	Bacteria
denovo24373	CP000830	2e-117	Dinoroseobacter shibae DFL 12	Bacteria
denovo24375	CP000083	3e-134	Colwellia psychrerythraea 34H	Bacteria
denovo24379	FJ868209	5e-68	uncultured gamma proteobacterium	Bacteria
denovo24397	CP000155	2e-73	Hahella chejuensis KCTC 2396	Bacteria
denovo24398	FJ899950	6e-61	Vesicomya gigas gill symbiont	Bacteria
denovo244	CP001229	1e-06	Sulfurihydrogenibium azorense Az-Fu1	Bacteria
denovo24407	CP003345	2e-36	Flexibacter litoralis DSM 6794	Bacteria
denovo24416	CP000302	2e-73	Shewanella denitrificans OS217	Bacteria
denovo24417	CP007224	3e-71	Pseudomonas aeruginosa PA96	Bacteria
denovo24420	AP010803	1e-94	Sphingobium japonicum UT26S	Bacteria
denovo24444	CP000514	5e-74	Marinobacter aquaeolei VT8	Bacteria
denovo24445	CP001339	2e-97	Thioalkalivibrio sulfidophilus HL-EbGr7	Bacteria
denovo24457	FO203363	3e-71	Marinobacter hydrocarbonoclasticus ATCC 49840	Bacteria
denovo24458	CP000155	5e-81	Hahella chejuensis KCTC 2396	Bacteria
denovo24461	AP012978	4e-75	endosymbiont of unidentified scaly snail isolate Monju	Bacteria
denovo24464	HG966617	3e-65	bacterium Ec32	Bacteria
denovo24466	LK391695	2e-67	Pseudomonas pseudoalcaligenes	Bacteria
denovo24480	CP001339	3e-133	Thioalkalivibrio sulfidophilus HL-EbGr7	Bacteria
denovo24489	CP000471	4e-17	Magnetococcus marinus MC-1	Bacteria
denovo24496	CP000084	0	Candidatus Pelagibacter ubique HTCC1062	Bacteria
denovo24499	CP001339	1e-57	Thioalkalivibrio sulfidophilus HL-EbGr7	Bacteria
denovo24514	KF521924	3e-83	deep-sea mussel NZ3 thioautotrophic gill symbiont	Bacteria
denovo24527	AE003849	1e-49	Xylella fastidiosa 9a5c	Bacteria
denovo24530	CP001339	1e-63	Thioalkalivibrio sulfidophilus HL-EbGr7	Bacteria
denovo24534	CP003590	0.083	Pleurocapsa sp. PCC 7327	Bacteria
denovo24549	CP003725	3e-108	Pseudomonas stutzeri DSM 10701	Bacteria
denovo24566	CP003588	2e-86	Pseudomonas putida ND6	Bacteria
denovo24568	CP003845	1e-57	Alteromonas macleodii str. 'Black Sea 11'	Bacteria
denovo24571	AP013070	2e-86	Pseudomonas putida NBRC 14164	Bacteria
denovo24579	CP002623	7e-117	Roseobacter litoralis Och 149	Bacteria
denovo24595	CP005990	4e-76	Spiribacter sp. UAH-SP71	Bacteria
denovo2460	CP002568	2e-98	Polymorphum gilvum SL003B-26A1	Bacteria
denovo24601	CP002738	7e-79	Methylomonas methanica MC09	Bacteria
denovo24613	FN650140	1e-64	Legionella longbeachae NSW150	Bacteria
denovo24614	CP000680	3e-70	Pseudomonas mendocina ymp	Bacteria
denovo24634	FJ868209	2e-93	uncultured gamma proteobacterium	Bacteria
denovo24638	CP000362	4e-146	Roseobacter denitrificans OCh 114	Bacteria
denovo24648	CP006773	1e-107	Leisingera methylohalidivorans DSM 14336	Bacteria
denovo24653	FJ868209	3e-83	uncultured gamma proteobacterium	Bacteria
denovo24683	AP012603	4e-75	Bradyrhizobium oligotrophicum S58	Bacteria
denovo24685	CP000830	6e-98	Dinoroseobacter shibae DFL 12	Bacteria
denovo24702	CP000514	8e-91	Marinobacter aquaeolei VT8	Bacteria
denovo24719	FJ868209	4e-69	uncultured gamma proteobacterium	Bacteria
denovo24736	CP003989	6e-86	Thioalkalivibrio nitratireducens DSM 14787	Bacteria
denovo24740	CP000252	5e-12	Syntrophus aciditrophicus SB	Bacteria
denovo24741	AP012978	3e-70	endosymbiont of unidentified scaly snail isolate Monju	Bacteria
denovo24767	AP012978	3e-109	endosymbiont of unidentified scaly snail isolate Monju	Bacteria
denovo24768	CP000662	5e-05	Rhodobacter sphaeroides ATCC 17025	Bacteria
denovo24773	CP000830	8e-104	Dinoroseobacter shibae DFL 12	Bacteria
denovo24774	CP001339	5e-74	Thioalkalivibrio sulfidophilus HL-EbGr7	Bacteria
denovo24793	AP012206	4e-38	Bradyrhizobium japonicum USDA 6	Bacteria
denovo24796	CP000680	6e-86	Pseudomonas mendocina ymp	Bacteria
denovo248	CP002738	5e-87	Methylomonas methanica MC09	Bacteria
denovo24801	HG966617	6e-48	bacterium Ec32	Bacteria
denovo24805	AP012547	4e-95	Sulfuritalea hydrogenivorans sk43H	Bacteria
denovo24820	FJ899953	4e-94	Vesicomya sp. endosymbiont	Bacteria
denovo2484	FJ899957	7e-85	Vesicomya sp. mt-III symbiont	Bacteria
denovo24845	AE000513	0.0002	Deinococcus radiodurans R1	Bacteria
denovo24851	CP001087	4e-70	Desulfobacterium autotrophicum HRM2	Bacteria
denovo24865	CP003734	2e-60	Pseudomonas putida DOT-T1E	Bacteria
denovo24870	CP002972	3e-116	Phaeobacter gallaeciensis 2.10	Bacteria
[truncated: 10,551 more rows]
