# Supplementary material for: Metabarcoding Is Powerful yet Still Blind: A Comparative Analysis of Morphological and Molecular Surveys of Seagrass Communities
Source: PLoS One. 2015 Feb 10;10(2):e0117562. doi: 10.1371/journal.pone.0117562 (PMC4323199; doi:10.1371/journal.pone.0117562)
Supplement: S3 Dataset — Included are MOTU names, the GenBank identifying number (GI), the e-value, the closest species match, the kingdom, the phylum, and the frequencies of each kingdom present in the dataset. The blastn algorithm was implemented under default parameters (see Appendix C of the BLAST command line applications user manual, http://www.ncbi.nlm.nih.gov/books/NBK1763/). (XLSX) [file pone.0117562.s003.xlsx]

## Sheet: S3 Dataset
	S3 Dataset	18S BLASTN Results		algorithm= blastn, default values: evalue (10.0), word size (11), gapopen(5), gapextend (2), reward (2), penalty (-3), percent identity (0), found on in Appendix C of BLAST Command Line Applications User Manual
													http://www.ncbi.nlm.nih.gov/books/NBK1763/
MOTUS	MOTUs	GI	Evalue	Species	Kingdom	Phylum
denovo2208	denovo2208	AY050182	5e-149	Amastigomonas mutabilis	Eukaryota	Apusozoa			Number of MOTUs	Frequency
denovo4	denovo4	AY050182	5e-162	Amastigomonas mutabilis	Eukaryota	Apusozoa		Metazoans	0	0
denovo1973	denovo1973	KM020071	2e-134	Chloroidium ellipsoideum	Eukaryota	Viridiplantae		Non-metazoans	23	0.479167
denovo1842	denovo1842	AF290540	0	Cryothecomonas longipes	Eukaryota	Rhizaria		Unknown	25	0.520833
denovo4467	denovo4467	KF791549	5e-168	Desmochloris sp. JB13	Eukaryota	Viridiplantae		Total	48	1
denovo5397	denovo5397	U78034	0	Giraudyopsis stellifera	Eukaryota	Stramenopiles
denovo1601	denovo1601	AJ561113	0	Pirsonia verrucosa	Eukaryota	Stramenopiles
denovo4013	denovo4013	JN104106	5e-174	Ulvella leptochaete	Eukaryota	Viridiplantae
denovo6509	denovo6509	JN104106	4e-176	Ulvella leptochaete	Eukaryota	Viridiplantae
denovo1906	denovo1906	EU567217	3e-165	uncultured cercozoan	Eukaryota	Cercozoan
denovo2297	denovo2297	FN690383	0	uncultured cercozoan	Eukaryota	Cercozoan
denovo343	denovo343	AY620326	0	uncultured cercozoan	Eukaryota	Cercozoan
denovo4310	denovo4310	AY620346	0	uncultured cercozoan	Eukaryota	Cercozoan
denovo5098	denovo5098	FN690410	0	uncultured cercozoan	Eukaryota	Cercozoan
denovo5856	denovo5856	FN690389	1e-176	uncultured cercozoan	Eukaryota	Cercozoan
denovo694	denovo694	FN690411	0	uncultured cercozoan	Eukaryota	Cercozoan
denovo803	denovo803	FN690391	0	uncultured cercozoan	Eukaryota	Cercozoan
denovo1275	denovo1275	EF023386	3e-145	uncultured Eimeriidae	Eukaryota	Alveolata
denovo1466	denovo1466	KJ003957	3e-164	uncultured eukaryote	Eukaryota	Unknown
denovo2021	denovo2021	AB695533	1e-163	uncultured eukaryote	Eukaryota	Unknown
denovo2315	denovo2315	AB695481	2e-168	uncultured eukaryote	Eukaryota	Unknown
denovo2444	denovo2444	AB505497	1e-164	uncultured eukaryote	Eukaryota	Unknown
denovo3915	denovo3915	HM227177	5e-175	uncultured eukaryote	Eukaryota	Unknown
denovo3927	denovo3927	GU072180	0	uncultured eukaryote	Eukaryota	Unknown
denovo4324	denovo4324	KJ568602	1e-157	uncultured eukaryote	Eukaryota	Unknown
denovo4486	denovo4486	AB970299	2e-154	uncultured eukaryote	Eukaryota	Unknown
denovo4494	denovo4494	AB970170	5e-143	uncultured eukaryote	Eukaryota	Unknown
denovo4561	denovo4561	DQ455735	7e-160	uncultured eukaryote	Eukaryota	Unknown
denovo5202	denovo5202	JF775136	0	uncultured eukaryote	Eukaryota	Unknown
denovo528	denovo528	JQ223037	6e-180	uncultured eukaryote	Eukaryota	Unknown
denovo5422	denovo5422	AB970074	1e-157	uncultured eukaryote	Eukaryota	Unknown
denovo5444	denovo5444	KJ762899	0	uncultured eukaryote	Eukaryota	Unknown
denovo5585	denovo5585	AB695481	6e-174	uncultured eukaryote	Eukaryota	Unknown
denovo5888	denovo5888	EU371397	7e-173	uncultured eukaryote	Eukaryota	Unknown
denovo5945	denovo5945	AB252758	0	uncultured eukaryote	Eukaryota	Unknown
denovo6260	denovo6260	AB505504	0	uncultured eukaryote	Eukaryota	Unknown
denovo791	denovo791	JN846848	7e-173	uncultured eukaryote	Eukaryota	Unknown
denovo988	denovo988	AB505485	2e-153	uncultured eukaryote	Eukaryota	Unknown
denovo1699	denovo1699	FJ800651	0	uncultured labyrinthulid	Eukaryota	Stramenopiles
denovo2385	denovo2385	FJ800632	4e-170	uncultured labyrinthulid	Eukaryota	Stramenopiles
denovo809	denovo809	FJ800645	3e-177	uncultured labyrinthulid	Eukaryota	Stramenopiles
denovo939	denovo939	FN598249	0	uncultured labyrinthulid	Eukaryota	Stramenopiles
denovo2457	denovo2457	KF534546	0	uncultured marine eukaryote	Eukaryota	Unknown
denovo3553	denovo3553	DQ369017	2e-161	uncultured marine eukaryote	Eukaryota	Unknown
denovo5700	denovo5700	EU078292	0	uncultured marine eukaryote	Eukaryota	Unknown
denovo86	denovo86	EU078292	1e-157	uncultured marine eukaryote	Eukaryota	Unknown
denovo662	denovo662	JF281629	0	uncultured microeukaryote	Eukaryota	Unknown
denovo89	denovo89	DQ229956	1e-170	Vermistella antarctica	Eukaryota	Amoebozoa
