# Supplementary material for: Metabarcoding Is Powerful yet Still Blind: A Comparative Analysis of Morphological and Molecular Surveys of Seagrass Communities
Source: PLoS One. 2015 Feb 10;10(2):e0117562. doi: 10.1371/journal.pone.0117562 (PMC4323199; doi:10.1371/journal.pone.0117562)
Supplement: S4 Dataset — (XLSX) [file pone.0117562.s004.xlsx]

## Sheet: S4 Dataset
S4 Dataset
Morphology	n = 322				COI MOTUs assigned		n = 944			18S MOTUs assigned		n = 1173
	Count	Frequency	Percent			Count	Frequency	Percent			Count	Frequency	Percent
Annelida	75	0.232919	23.2919		Annelida	22	0.0233051	2.33051		Annelida	629	0.536232	53.6232
Arthropoda	121	0.375776	37.5776		Arthropoda	594	0.629237	62.9237		Arthropoda	186	0.158568	15.8568
Brachiopoda	0	0	0		Brachiopoda	54	0.0572034	5.72034		Brachiopoda	1	0.000852515	0.0852515
Cnidaria	7	0.0217391	2.17391		Cnidaria	20	0.0211864	2.11864		Cnidaria	25	0.0213129	2.13129
Chordata	24	0.0745342	7.45342		Chordata	32	0.0338983	3.38983		Chordata	0	0	0
Echinodermata	7	0.0217391	2.17391		Echinodermata	2	0.00211864	0.211864		Echinodermata	0	0	0
Entoprocta	0	0	0		Entoprocta	10	0.0105932	1.05932		Entoprocta	0	0	0
Mollusca	82	0.254658	25.4658		Mollusca	202	0.213983	21.3983		Mollusca	65	0.0554135	5.54135
Nematoda	0	0	0		Nematoda	2	0.00211864	0.211864		Nematoda	201	0.171355	17.1355
Nemertea	1	0.00310559	0.310559		Nemertea	0	0	0		Nemertea	2	0.00170503	0.170503
Platyhelminthes	0	0	0		Platyhelminthes	2	0.00211864	0.211864		Platyhelminthes	17	0.0144928	1.44928
Porifera	3	0.00931677	0.931677		Porifera	0	0	0		Porifera	44	0.0375107	3.75107
Rotifera	0	0	0		Rotifera	4	0.00423729	0.423729		Rotifera	0	0	0
Sipuncula*	2	0.00621118	0.621118		Sipuncula*	0	0	0		Sipuncula*	3	0.00255754	0.255754
Total	322	1	100		Total	944	1	100		Total	1173	1	100
* note: Sipuncula counts were merged with Annelida for Figure 3 in the main article
					COI MOTUs individually BLASTED			n =2587 of 12,548
						Count	Frequency	Percent
					Annelida	546	0.211055	21.1055
					Arthropoda	448	0.173174	17.3174
					Brachiopoda	0	0	0
					Chordata	714	0.275995	27.5995
					Cnidaria	21	0.00811751	0.811751
					Echinodermata	9	0.00347893	0.347893
					Entoprocta	0	0	0
					Mollusca	671	0.259374	25.9374
					Nematoda	20	0.00773096	0.773096
					Nemertea	0	0	0
					Platyhelminthes	72	0.0278315	2.78315
					Porifera	81	0.0313104	3.13104
					Rotifera	5	0.00193274	0.193274
					Total	2587	1	100
