# Supplementary material for: Metabarcoding Is Powerful yet Still Blind: A Comparative Analysis of Morphological and Molecular Surveys of Seagrass Communities
Source: PLoS One. 2015 Feb 10;10(2):e0117562. doi: 10.1371/journal.pone.0117562 (PMC4323199; doi:10.1371/journal.pone.0117562)
Supplement: S5 Dataset — Chao1 values were generated by meadow site using Vegan in the software R, while Jaccard distances were generated by meadow, by core and by sample using the program PAST. (XLSX) [file pone.0117562.s005.xlsx]

## Sheet: S5 Dataset
S5 Dataset
Morphology REBENT
ARR = ARRADON
H = L'ARCOUEST
SM = SAINT MALO
SMG = SAINTE MARGUERITE
C = ILE CALLOT
RO = ROSCANVEL
Alpha diversity index chaos1 by site		Generated by Vegan (v.) in the software R
	chao	chao.se	jack1	jack1.se	jack2	boot	boot.se	n
ARR	70	92.2222	13.2611	87.7778	7.41037	97.2083	78.0791	3.83134
C	95	131	15.8745	127	12.5078	142.75	109.647	6.72095
H	70	92.7812	11.4937	94	10.7497	104.111	81.1445	5.66594
SMG2011	63	88	15.1038	80.7778	7.04132	90.8889	70.9961	3.59254
RO	80	100.346	11.1438	100.444	8.35035	109.486	89.5597	4.46586
SM	49	63	9.89949	61.4444	5.53329	67.5694	54.8356	3.23822
SMG2010	65	11.22	59	9.898	63.5	52.67	5.207	3
Morphology REBENT
Jaccard Distances - Beta diversity		Generated by PAST(Hammer et al. 2001)
by meadow
	ARR	C	H	RO	SMG	SM
ARR	1	0.341667	0.346535	0.292035	0.264706	0.306818
C	0.341667	1	0.341667	0.346457	0.305085	0.272727
H	0.346535	0.341667	1	0.247863	0.252427	0.337209
RO	0.292035	0.346457	0.247863	1	0.168067	0.146789
SMG	0.264706	0.305085	0.252427	0.168067	1	0.227273
SM	0.306818	0.272727	0.337209	0.146789	0.227273	1
by core
	Core1	Core2	Core3
Core1	1	0.628743	0.653179
Core2	0.628743	1	0.676647
Core3	0.653179	0.676647	1
by sample
	ARR_A1	ARR_A2	ARR_A3	ARR_B1	ARR_B2	ARR_B3	ARR_C1	ARR_C2	ARR_C3	C_A1	C_A2	C_A3	C_B1	C_B2	C_B3	C_C1	C_C2	C_C3	H_A1	H_A2	H_A3	H_B1	H_B2	H_B3	H_C1	H_C2	H_C3	RO_A1	RO_A2	RO_A3	RO_B1	RO_B2	RO_B3	RO_C1	RO_C2	RO_C3	SMG_A1	SMG_A2	SMG_A3	SMG_B1	SMG_B2	SMG_B3	SMG_C1	SMG_C2	SMG_C3	SM_A1	SM_A2	SM_A3	SM_B1
ARR_A1	1	0.5	0.404255	0.487179	0.414634	0.418605	0.377778	0.380952	0.409091	0.222222	0.226415	0.25	0.266667	0.255319	0.142857	0.166667	0.1875	0.2	0.190476	0.214286	0.152174	0.195122	0.292683	0.1875	0.125	0.204545	0.270833	0.2	0.196429	0.255319	0.207547	0.170213	0.229167	0.176471	0.163636	0.142857	0.12	0.173913	0.137255	0.163265	0.16	0.150943	0.113208	0.132075	0.176471	0.23913	0.214286	0.162791	0.102564
ARR_A2	0.5	1	0.52381	0.513514	0.473684	0.439024	0.363636	0.4	0.304348	0.207547	0.211538	0.236364	0.341463	0.325581	0.148936	0.173077	0.145833	0.183673	0.263158	0.25641	0.186047	0.175	0.342105	0.222222	0.155556	0.275	0.340909	0.254902	0.203704	0.295455	0.215686	0.204545	0.23913	0.234043	0.24	0.148148	0.2	0.268293	0.217391	0.222222	0.166667	0.156863	0.163265	0.16	0.183673	0.25	0.225	0.170732	0.108108
ARR_A3	0.404255	0.52381	1	0.512195	0.512195	0.547619	0.466667	0.47619	0.346939	0.206897	0.210526	0.233333	0.297872	0.285714	0.153846	0.240741	0.12963	0.185185	0.285714	0.25	0.1875	0.232558	0.357143	0.270833	0.208333	0.266667	0.326531	0.296296	0.224138	0.3125	0.214286	0.229167	0.285714	0.28	0.214286	0.192982	0.22449	0.26087	0.192308	0.173077	0.192308	0.203704	0.145455	0.163636	0.207547	0.297872	0.309524	0.2	0.146341
ARR_B1	0.487179	0.513514	0.512195	1	0.542857	0.540541	0.414634	0.588235	0.414634	0.169811	0.150943	0.178571	0.261905	0.25	0.130435	0.204082	0.232558	0.191489	0.243243	0.27027	0.166667	0.216216	0.289474	0.177778	0.136364	0.225	0.23913	0.215686	0.145455	0.222222	0.111111	0.159091	0.195652	0.191489	0.132075	0.111111	0.155556	0.25	0.173913	0.232558	0.173913	0.1875	0.145833	0.166667	0.272727	0.232558	0.205128	0.15	0.0833333
ARR_B2	0.414634	0.473684	0.512195	0.542857	1	0.583333	0.380952	0.459459	0.288889	0.24	0.244898	0.245283	0.292683	0.25	0.155556	0.229167	0.177778	0.217391	0.277778	0.382353	0.225	0.216216	0.324324	0.232558	0.190476	0.289474	0.325581	0.24	0.166667	0.25	0.153846	0.214286	0.222222	0.191489	0.2	0.111111	0.130435	0.190476	0.148936	0.152174	0.148936	0.163265	0.1	0.142857	0.191489	0.292683	0.305556	0.210526	0.147059
ARR_B3	0.418605	0.439024	0.547619	0.540541	0.583333	1	0.452381	0.5	0.452381	0.181818	0.163636	0.254545	0.244444	0.234043	0.170213	0.192308	0.244444	0.204082	0.225	0.25	0.155556	0.230769	0.238095	0.217391	0.152174	0.209302	0.276596	0.25	0.157895	0.234043	0.145455	0.148936	0.16	0.156863	0.166667	0.0677966	0.170213	0.204545	0.1875	0.191489	0.212766	0.2	0.137255	0.18	0.255319	0.244444	0.25	0.139535	0.135135
ARR_C1	0.377778	0.363636	0.466667	0.414634	0.380952	0.452381	1	0.45	0.47619	0.2	0.181818	0.25	0.23913	0.229167	0.191489	0.188679	0.23913	0.22449	0.282051	0.307692	0.152174	0.225	0.325	0.1875	0.125	0.232558	0.297872	0.222222	0.175439	0.204082	0.163636	0.170213	0.18	0.2	0.142857	0.163636	0.191489	0.2	0.208333	0.212766	0.234043	0.270833	0.156863	0.2	0.2	0.212766	0.186047	0.136364	0.102564
ARR_C2	0.380952	0.4	0.47619	0.588235	0.459459	0.5	0.45	1	0.487179	0.215686	0.173077	0.2	0.261905	0.25	0.155556	0.18	0.232558	0.244444	0.243243	0.27027	0.195122	0.25	0.324324	0.261905	0.190476	0.324324	0.295455	0.192308	0.125	0.170213	0.0909091	0.133333	0.170213	0.191489	0.132075	0.111111	0.130435	0.219512	0.173913	0.177778	0.2	0.212766	0.122449	0.166667	0.272727	0.292683	0.305556	0.243243	0.114286
ARR_C3	0.409091	0.304348	0.346939	0.414634	0.288889	0.452381	0.47619	0.487179	1	0.137931	0.140351	0.186441	0.163265	0.18	0.142857	0.188679	0.295455	0.2	0.190476	0.243902	0.12766	0.225	0.232558	0.1875	0.173913	0.204545	0.326087	0.137931	0.155172	0.134615	0.142857	0.1	0.134615	0.111111	0.0847458	0.0847458	0.191489	0.2	0.208333	0.1875	0.234043	0.244898	0.156863	0.176471	0.22449	0.163265	0.186047	0.111111	0.131579
C_A1	0.222222	0.207547	0.206897	0.169811	0.24	0.181818	0.2	0.215686	0.137931	1	0.38	0.510204	0.386364	0.4	0.333333	0.196429	0.150943	0.185185	0.148936	0.145833	0.14	0.204545	0.23913	0.196078	0.137255	0.163265	0.203704	0.296296	0.290909	0.3125	0.259259	0.311111	0.285714	0.254902	0.214286	0.236364	0.0714286	0.137255	0.0689655	0.0892857	0.127273	0.101695	0.05	0.0847458	0.163636	0.173077	0.122449	0.102041	0.0444444
C_A2	0.226415	0.211538	0.210526	0.150943	0.244898	0.163636	0.181818	0.173077	0.140351	0.38	1	0.489796	0.333333	0.347826	0.311111	0.222222	0.132075	0.166667	0.152174	0.227273	0.166667	0.155556	0.272727	0.176471	0.14	0.142857	0.230769	0.326923	0.22807	0.291667	0.175439	0.208333	0.169811	0.188679	0.196429	0.196429	0.0925926	0.14	0.12963	0.0909091	0.109091	0.122807	0.0508475	0.125	0.125	0.153846	0.173913	0.104167	0.0952381
C_A3	0.25	0.236364	0.233333	0.178571	0.245283	0.254545	0.25	0.2	0.186441	0.510204	0.489796	1	0.413043	0.488889	0.391304	0.224138	0.181818	0.214286	0.16	0.156863	0.150943	0.23913	0.244898	0.226415	0.148148	0.173077	0.210526	0.37037	0.271186	0.34	0.241379	0.26	0.288462	0.259259	0.263158	0.220339	0.0847458	0.127273	0.118644	0.12069	0.118644	0.112903	0.0634921	0.152542	0.152542	0.160714	0.156863	0.0943396	0.0408163
C_B1	0.266667	0.341463	0.297872	0.261905	0.292683	0.244444	0.23913	0.261905	0.163265	0.386364	0.333333	0.413043	1	0.542857	0.342105	0.288889	0.238095	0.222222	0.216216	0.210526	0.230769	0.294118	0.333333	0.268293	0.25641	0.2	0.244444	0.326087	0.169811	0.285714	0.229167	0.282051	0.285714	0.25	0.204082	0.204082	0.108696	0.195122	0.12766	0.181818	0.177778	0.166667	0.102041	0.170213	0.195652	0.238095	0.210526	0.153846	0.0555556
C_B2	0.255319	0.325581	0.285714	0.25	0.25	0.234043	0.229167	0.25	0.18	0.4	0.347826	0.488889	0.542857	1	0.514286	0.363636	0.2	0.325581	0.342857	0.230769	0.190476	0.277778	0.351351	0.35	0.243902	0.282051	0.208333	0.285714	0.254902	0.365854	0.244898	0.238095	0.302326	0.266667	0.196078	0.244898	0.12766	0.214286	0.170213	0.173913	0.195652	0.16	0.142857	0.212766	0.1875	0.285714	0.2	0.175	0.0810811
C_B3	0.142857	0.148936	0.153846	0.130435	0.155556	0.170213	0.191489	0.155556	0.142857	0.333333	0.311111	0.391304	0.342105	0.514286	1	0.325581	0.243902	0.285714	0.222222	0.153846	0.205128	0.194444	0.175	0.186047	0.2	0.175	0.122449	0.25	0.196078	0.261905	0.183673	0.166667	0.204545	0.173913	0.115385	0.16	0.0869565	0.142857	0.155556	0.133333	0.155556	0.122449	0.12766	0.2	0.125	0.186047	0.153846	0.157895	0.0882353
C_C1	0.166667	0.173077	0.240741	0.204082	0.229167	0.192308	0.188679	0.18	0.188679	0.196429	0.222222	0.224138	0.288889	0.363636	0.325581	1	0.26087	0.326087	0.243902	0.209302	0.173913	0.190476	0.255814	0.183673	0.25	0.173913	0.215686	0.116667	0.114754	0.132075	0.101695	0.12	0.111111	0.0892857	0.101695	0.0833333	0.0961538	0.145833	0.156863	0.183673	0.18	0.127273	0.153846	0.173077	0.196078	0.234043	0.209302	0.159091	0.1
C_C2	0.1875	0.145833	0.12963	0.232558	0.177778	0.244444	0.23913	0.232558	0.295455	0.150943	0.132075	0.181818	0.238095	0.2	0.243902	0.26087	1	0.309524	0.25	0.277778	0.170732	0.294118	0.230769	0.181818	0.25641	0.170732	0.272727	0.12963	0.107143	0.08	0.0925926	0.111111	0.08	0.1	0.113208	0.0727273	0.159091	0.195122	0.232558	0.238095	0.261905	0.244444	0.255814	0.27907	0.25	0.268293	0.179487	0.153846	0.151515
C_C3	0.2	0.183673	0.185185	0.191489	0.217391	0.204082	0.22449	0.244444	0.2	0.185185	0.166667	0.214286	0.222222	0.325581	0.285714	0.326087	0.309524	1	0.333333	0.289474	0.214286	0.236842	0.307692	0.27907	0.3	0.243902	0.229167	0.122807	0.101695	0.0961538	0.107143	0.104167	0.117647	0.137255	0.107143	0.107143	0.125	0.181818	0.166667	0.222222	0.272727	0.204082	0.1875	0.234043	0.234043	0.27907	0.225	0.2	0.108108
H_A1	0.190476	0.263158	0.285714	0.243243	0.277778	0.225	0.282051	0.243243	0.190476	0.148936	0.152174	0.16	0.216216	0.342857	0.222222	0.243902	0.25	0.333333	1	0.5	0.322581	0.321429	0.413793	0.285714	0.354839	0.413793	0.324324	0.102041	0.1	0.119048	0.0833333	0.131579	0.119048	0.116279	0.0833333	0.106383	0.189189	0.235294	0.277778	0.216216	0.243243	0.225	0.205128	0.263158	0.230769	0.451613	0.3	0.310345	0.291667
H_A2	0.214286	0.25641	0.25	0.27027	0.382353	0.25	0.307692	0.27027	0.243902	0.145833	0.227273	0.156863	0.210526	0.230769	0.153846	0.209302	0.277778	0.289474	0.5	1	0.354839	0.225806	0.4	0.243243	0.30303	0.4	0.388889	0.145833	0.0980392	0.116279	0.0392157	0.1	0.0909091	0.113636	0.0816327	0.104167	0.184211	0.228571	0.205128	0.210526	0.205128	0.219512	0.142857	0.195122	0.225	0.277778	0.290323	0.258065	0.28
H_A3	0.152174	0.186047	0.1875	0.166667	0.225	0.155556	0.152174	0.195122	0.12766	0.14	0.166667	0.150943	0.230769	0.190476	0.205128	0.173913	0.170732	0.214286	0.322581	0.354839	1	0.290323	0.333333	0.170732	0.323529	0.294118	0.238095	0.14	0.0943396	0.111111	0.0784314	0.121951	0.136364	0.108696	0.1	0.0784314	0.119048	0.184211	0.139535	0.170732	0.166667	0.155556	0.111111	0.159091	0.159091	0.230769	0.272727	0.322581	0.133333
H_B1	0.195122	0.175	0.232558	0.216216	0.216216	0.230769	0.225	0.25	0.225	0.204545	0.155556	0.23913	0.294118	0.277778	0.194444	0.190476	0.294118	0.236842	0.321429	0.225806	0.290323	1	0.37931	0.333333	0.322581	0.290323	0.333333	0.204545	0.148936	0.179487	0.159091	0.2	0.210526	0.236842	0.214286	0.186047	0.131579	0.138889	0.153846	0.128205	0.184211	0.170732	0.15	0.175	0.175	0.257143	0.1875	0.15625	0.111111
H_B2	0.292683	0.342105	0.357143	0.289474	0.324324	0.238095	0.325	0.324324	0.232558	0.23913	0.272727	0.244898	0.333333	0.351351	0.175	0.255814	0.230769	0.307692	0.413793	0.4	0.333333	0.37931	1	0.411765	0.323529	0.375	0.405405	0.212766	0.183673	0.219512	0.170213	0.210526	0.190476	0.214286	0.145833	0.170213	0.205128	0.285714	0.225	0.263158	0.25641	0.238095	0.190476	0.243902	0.243902	0.371429	0.354839	0.28125	0.133333
H_B3	0.1875	0.222222	0.270833	0.177778	0.232558	0.217391	0.1875	0.261905	0.1875	0.196078	0.176471	0.226415	0.268293	0.35	0.186047	0.183673	0.181818	0.27907	0.285714	0.243243	0.170732	0.333333	0.411765	1	0.225	0.297297	0.244444	0.22	0.148148	0.227273	0.156863	0.190476	0.227273	0.170213	0.204082	0.156863	0.108696	0.139535	0.177778	0.130435	0.152174	0.191489	0.125	0.145833	0.170213	0.3	0.314286	0.184211	0.151515
H_C1	0.125	0.155556	0.208333	0.136364	0.190476	0.152174	0.125	0.190476	0.173913	0.137255	0.14	0.148148	0.25641	0.243902	0.2	0.25	0.25641	0.3	0.354839	0.30303	0.323529	0.322581	0.323529	0.225	1	0.451613	0.394737	0.137255	0.0925926	0.108696	0.0980392	0.119048	0.108696	0.130435	0.0769231	0.0980392	0.170732	0.243243	0.190476	0.25641	0.315789	0.204545	0.214286	0.268293	0.268293	0.289474	0.34375	0.3125	0.206897
H_C2	0.204545	0.275	0.266667	0.225	0.289474	0.209302	0.232558	0.324324	0.204545	0.163265	0.142857	0.173077	0.2	0.282051	0.175	0.173913	0.170732	0.243902	0.413793	0.4	0.294118	0.290323	0.375	0.297297	0.451613	1	0.405405	0.163265	0.115385	0.162791	0.1	0.15	0.190476	0.159091	0.145833	0.122449	0.146341	0.216216	0.166667	0.2	0.195122	0.181818	0.162791	0.186047	0.186047	0.333333	0.354839	0.413793	0.259259
H_C3	0.270833	0.340909	0.326531	0.23913	0.325581	0.276596	0.297872	0.295455	0.326087	0.203704	0.230769	0.210526	0.244444	0.208333	0.122449	0.215686	0.272727	0.229167	0.324324	0.388889	0.238095	0.333333	0.405405	0.244444	0.394737	0.405405	1	0.181818	0.178571	0.16	0.166667	0.173913	0.16	0.18	0.166667	0.125	0.195652	0.204545	0.1875	0.191489	0.212766	0.2	0.137255	0.18	0.18	0.272727	0.282051	0.225	0.235294
RO_A1	0.2	0.254902	0.296296	0.215686	0.24	0.25	0.222222	0.192308	0.137931	0.296296	0.326923	0.37037	0.326087	0.285714	0.25	0.116667	0.12963	0.122807	0.102041	0.145833	0.14	0.204545	0.212766	0.22	0.137255	0.163265	0.181818	1	0.365385	0.5	0.333333	0.404762	0.369565	0.454545	0.36	0.307692	0.132075	0.183673	0.148148	0.150943	0.148148	0.160714	0.0862069	0.142857	0.142857	0.109091	0.122449	0.08	0.0681818
RO_A2	0.196429	0.203704	0.224138	0.145455	0.166667	0.157895	0.175439	0.125	0.155172	0.290909	0.22807	0.271186	0.169811	0.254902	0.196078	0.114754	0.107143	0.101695	0.1	0.0980392	0.0943396	0.148936	0.183673	0.148148	0.0925926	0.115385	0.178571	0.365385	1	0.454545	0.468085	0.363636	0.333333	0.413043	0.4375	0.352941	0.0517241	0.0925926	0.0677966	0.0689655	0.0862069	0.0645161	0.0666667	0.101695	0.0483871	0.107143	0.0769231	0.0784314	0.0666667
RO_A3	0.255319	0.295455	0.3125	0.222222	0.25	0.234043	0.204082	0.170213	0.134615	0.3125	0.291667	0.34	0.285714	0.365854	0.261905	0.132075	0.08	0.0961538	0.119048	0.116279	0.111111	0.179487	0.219512	0.227273	0.108696	0.162791	0.16	0.5	0.454545	1	0.326087	0.3	0.473684	0.425	0.386364	0.270833	0.0816327	0.133333	0.145833	0.102041	0.122449	0.115385	0.0769231	0.14	0.0754717	0.148936	0.116279	0.0930233	0.0810811
RO_B1	0.207547	0.215686	0.214286	0.111111	0.153846	0.145455	0.163636	0.0909091	0.142857	0.259259	0.175439	0.241379	0.229167	0.244898	0.183673	0.101695	0.0925926	0.107143	0.0833333	0.0392157	0.0784314	0.159091	0.170213	0.156863	0.0980392	0.1	0.166667	0.333333	0.468085	0.326087	1	0.295455	0.386364	0.347826	0.404255	0.375	0.0357143	0.0769231	0.0344828	0.0727273	0.0909091	0.0862069	0.0701754	0.107143	0.0333333	0.113208	0.06	0.0612245	0.0227273
RO_B2	0.170213	0.204545	0.229167	0.159091	0.214286	0.148936	0.170213	0.133333	0.1	0.311111	0.208333	0.26	0.282051	0.238095	0.166667	0.12	0.111111	0.104167	0.131579	0.1	0.121951	0.2	0.210526	0.190476	0.119048	0.15	0.173913	0.404762	0.363636	0.3	0.295455	1	0.3	0.292683	0.266667	0.23913	0.0652174	0.119048	0.0625	0.0869565	0.0625	0.08	0.0612245	0.06	0.0816327	0.111111	0.1	0.102564	0.0285714
RO_B3	0.229167	0.23913	0.285714	0.195652	0.222222	0.16	0.18	0.170213	0.134615	0.285714	0.169811	0.288462	0.285714	0.302326	0.204545	0.111111	0.08	0.117647	0.119048	0.0909091	0.136364	0.210526	0.190476	0.227273	0.108696	0.190476	0.16	0.369565	0.333333	0.473684	0.386364	0.3	1	0.5	0.386364	0.326087	0.0392157	0.0851064	0.0576923	0.0588235	0.0576923	0.0740741	0.037037	0.0555556	0.0555556	0.125	0.116279	0.119048	0.0526316
RO_C1	0.176471	0.234043	0.28	0.191489	0.191489	0.156863	0.2	0.191489	0.111111	0.254902	0.188679	0.259259	0.25	0.266667	0.173913	0.0892857	0.1	0.137255	0.116279	0.113636	0.108696	0.236842	0.214286	0.170213	0.130435	0.159091	0.18	0.454545	0.413043	0.425	0.347826	0.292683	0.5	1	0.44186	0.47619	0.0384615	0.106383	0.0566038	0.0784314	0.0980392	0.0925926	0.0754717	0.0943396	0.0740741	0.122449	0.113636	0.116279	0.0512821
RO_C2	0.163636	0.24	0.214286	0.132075	0.2	0.166667	0.142857	0.132075	0.0847458	0.214286	0.196429	0.263158	0.204082	0.196078	0.115385	0.101695	0.113208	0.107143	0.0833333	0.0816327	0.1	0.214286	0.145833	0.204082	0.0769231	0.145833	0.166667	0.36	0.4375	0.386364	0.404255	0.266667	0.386364	0.44186	1	0.434783	0.0545455	0.0769231	0.0714286	0.0535714	0.0526316	0.0677966	0.0517241	0.0508475	0.0333333	0.113208	0.104167	0.106383	0.0465116
RO_C3	0.142857	0.148148	0.192982	0.111111	0.111111	0.0677966	0.163636	0.111111	0.0847458	0.236364	0.196429	0.220339	0.204082	0.244898	0.16	0.0833333	0.0727273	0.107143	0.106383	0.104167	0.0784314	0.186047	0.170213	0.156863	0.0980392	0.122449	0.125	0.307692	0.352941	0.270833	0.375	0.23913	0.326087	0.47619	0.434783	1	0.0357143	0.0769231	0.0344828	0.0535714	0.0526316	0.05	0.0338983	0.0508475	0.0333333	0.134615	0.0816327	0.0833333	0.0465116
SMG_A1	0.12	0.2	0.22449	0.155556	0.130435	0.170213	0.191489	0.130435	0.191489	0.0714286	0.0925926	0.0847458	0.108696	0.12766	0.0869565	0.0961538	0.159091	0.125	0.189189	0.184211	0.119048	0.131579	0.205128	0.108696	0.170732	0.146341	0.195652	0.132075	0.0517241	0.0816327	0.0357143	0.0652174	0.0392157	0.0384615	0.0545455	0.0357143	1	0.6	0.485714	0.457143	0.485714	0.571429	0.432432	0.459459	0.5	0.133333	0.125	0.0731707	0.0882353
SMG_A2	0.173913	0.268293	0.26087	0.25	0.190476	0.204545	0.2	0.219512	0.2	0.137255	0.14	0.127273	0.195122	0.214286	0.142857	0.145833	0.195122	0.181818	0.235294	0.228571	0.184211	0.138889	0.285714	0.139535	0.243243	0.216216	0.204545	0.183673	0.0925926	0.133333	0.0769231	0.119048	0.0851064	0.106383	0.0769231	0.0769231	0.6	1	0.5625	0.633333	0.515152	0.514286	0.457143	0.529412	0.575758	0.166667	0.162162	0.135135	0.0606061
SMG_A3	0.137255	0.217391	0.192308	0.173913	0.148936	0.1875	0.208333	0.173913	0.208333	0.0689655	0.12963	0.118644	0.12766	0.170213	0.155556	0.156863	0.232558	0.166667	0.277778	0.205128	0.139535	0.153846	0.225	0.177778	0.190476	0.166667	0.1875	0.148148	0.0677966	0.145833	0.0344828	0.0625	0.0576923	0.0566038	0.0714286	0.0344828	0.485714	0.5625	1	0.514286	0.459459	0.5	0.486486	0.555556	0.435897	0.177778	0.146341	0.0952381	0.114286
SMG_B1	0.163265	0.222222	0.173077	0.232558	0.152174	0.191489	0.212766	0.177778	0.1875	0.0892857	0.0909091	0.12069	0.181818	0.173913	0.133333	0.183673	0.238095	0.222222	0.216216	0.210526	0.170732	0.128205	0.263158	0.130435	0.25641	0.2	0.191489	0.150943	0.0689655	0.102041	0.0727273	0.0869565	0.0588235	0.0784314	0.0535714	0.0535714	0.457143	0.633333	0.514286	1	0.514286	0.435897	0.542857	0.527778	0.617647	0.155556	0.15	0.125	0.0555556
SMG_B2	0.16	0.166667	0.192308	0.173913	0.148936	0.212766	0.234043	0.2	0.234043	0.127273	0.109091	0.118644	0.177778	0.195652	0.155556	0.18	0.261905	0.272727	0.243243	0.205128	0.166667	0.184211	0.25641	0.152174	0.315789	0.195122	0.212766	0.148148	0.0862069	0.122449	0.0909091	0.0625	0.0576923	0.0980392	0.0526316	0.0526316	0.485714	0.515152	0.459459	0.514286	1	0.583333	0.527778	0.6	0.513514	0.177778	0.175	0.121951	0.114286
SMG_B3	0.150943	0.156863	0.203704	0.1875	0.163265	0.2	0.270833	0.212766	0.244898	0.101695	0.122807	0.112903	0.166667	0.16	0.122449	0.127273	0.244444	0.204082	0.225	0.219512	0.155556	0.170732	0.238095	0.191489	0.204545	0.181818	0.2	0.160714	0.0645161	0.115385	0.0862069	0.08	0.0740741	0.0925926	0.0677966	0.05	0.571429	0.514286	0.5	0.435897	0.583333	1	0.526316	0.594595	0.475	0.166667	0.162791	0.113636	0.105263
SMG_C1	0.113208	0.163265	0.145455	0.145833	0.1	0.137255	0.156863	0.122449	0.156863	0.05	0.0508475	0.0634921	0.102041	0.142857	0.12766	0.153846	0.255814	0.1875	0.205128	0.142857	0.111111	0.15	0.190476	0.125	0.214286	0.162791	0.137255	0.0862069	0.0666667	0.0769231	0.0701754	0.0612245	0.037037	0.0754717	0.0517241	0.0338983	0.432432	0.457143	0.486486	0.542857	0.527778	0.526316	1	0.628571	0.425	0.148936	0.116279	0.0930233	0.0810811
SMG_C2	0.132075	0.16	0.163636	0.166667	0.142857	0.18	0.2	0.166667	0.176471	0.0847458	0.125	0.152542	0.170213	0.212766	0.2	0.173077	0.27907	0.234043	0.263158	0.195122	0.159091	0.175	0.243902	0.145833	0.268293	0.186047	0.18	0.142857	0.101695	0.14	0.107143	0.06	0.0555556	0.0943396	0.0508475	0.0508475	0.459459	0.529412	0.555556	0.527778	0.6	0.594595	0.628571	1	0.45	0.170213	0.166667	0.116279	0.108108
SMG_C3	0.176471	0.183673	0.207547	0.272727	0.191489	0.255319	0.2	0.272727	0.22449	0.163636	0.125	0.152542	0.195652	0.1875	0.125	0.196078	0.25	0.234043	0.230769	0.225	0.159091	0.175	0.243902	0.170213	0.268293	0.186047	0.18	0.142857	0.0483871	0.0754717	0.0333333	0.0816327	0.0555556	0.0740741	0.0333333	0.0333333	0.5	0.575758	0.435897	0.617647	0.513514	0.475	0.425	0.45	1	0.195652	0.195122	0.116279	0.0789474
SM_A1	0.23913	0.25	0.297872	0.232558	0.292683	0.244444	0.212766	0.292683	0.163265	0.173077	0.153846	0.160714	0.238095	0.285714	0.186047	0.234043	0.268293	0.27907	0.451613	0.277778	0.230769	0.257143	0.371429	0.3	0.289474	0.333333	0.272727	0.109091	0.107143	0.148936	0.113208	0.111111	0.125	0.122449	0.113208	0.134615	0.133333	0.166667	0.177778	0.155556	0.177778	0.166667	0.148936	0.170213	0.195652	1	0.586207	0.40625	0.407407
SM_A2	0.214286	0.225	0.309524	0.205128	0.305556	0.25	0.186047	0.305556	0.186047	0.122449	0.173913	0.156863	0.210526	0.2	0.153846	0.209302	0.179487	0.225	0.3	0.290323	0.272727	0.1875	0.354839	0.314286	0.34375	0.354839	0.282051	0.122449	0.0769231	0.116279	0.06	0.1	0.116279	0.113636	0.104167	0.0816327	0.125	0.162162	0.146341	0.15	0.175	0.162791	0.116279	0.166667	0.195122	0.586207	1	0.56	0.454545
SM_A3	0.162791	0.170732	0.2	0.15	0.210526	0.139535	0.136364	0.243243	0.111111	0.102041	0.104167	0.0943396	0.153846	0.175	0.157895	0.159091	0.153846	0.2	0.310345	0.258065	0.322581	0.15625	0.28125	0.184211	0.3125	0.413793	0.225	0.08	0.0784314	0.0930233	0.0612245	0.102564	0.119048	0.116279	0.106383	0.0833333	0.0731707	0.135135	0.0952381	0.125	0.121951	0.113636	0.0930233	0.116279	0.116279	0.40625	0.56	1	0.347826
SM_B1	0.102564	0.108108	0.146341	0.0833333	0.147059	0.135135	0.102564	0.114286	0.131579	0.0444444	0.0952381	0.0408163	0.0555556	0.0810811	0.0882353	0.1	0.151515	0.108108	0.291667	0.28	0.133333	0.111111	0.133333	0.151515	0.206897	0.259259	0.235294	0.0681818	0.0666667	0.0810811	0.0227273	0.0285714	0.0526316	0.0512821	0.0465116	0.0465116	0.0882353	0.0606061	0.114286	0.0555556	0.114286	0.105263	0.0810811	0.108108	0.0789474	0.407407	0.454545	0.347826	1
SM_B2	0.227273	0.181818	0.208333	0.219512	0.282051	0.177778	0.148936	0.219512	0.173913	0.16	0.1875	0.107143	0.225	0.186047	0.170732	0.25	0.166667	0.238095	0.272727	0.34375	0.25	0.108108	0.25	0.166667	0.243243	0.323529	0.204545	0.0943396	0.0727273	0.108696	0.0566038	0.0681818	0.108696	0.0833333	0.0769231	0.0769231	0.0666667	0.121951	0.0869565	0.113636	0.136364	0.104167	0.0625	0.106383	0.155556	0.4	0.482759	0.4	0.346154
SM_B3	0.179487	0.157895	0.162791	0.135135	0.166667	0.097561	0.121951	0.105263	0.0952381	0.0638298	0.0652174	0.0384615	0.0789474	0.102564	0.0810811	0.119048	0.108108	0.157895	0.307692	0.25	0.15625	0.0645161	0.15625	0.108108	0.1875	0.275862	0.153846	0.0638298	0.0625	0.131579	0.0434783	0.0263158	0.075	0.047619	0.0666667	0.0666667	0.111111	0.117647	0.135135	0.108108	0.166667	0.125	0.102564	0.128205	0.0731707	0.366667	0.346154	0.36	0.5
SM_C1	0.121951	0.1	0.111111	0.135135	0.105263	0.0714286	0.121951	0.135135	0.121951	0.0869565	0.0888889	0.0384615	0.0789474	0.131579	0.0810811	0.146341	0.205882	0.222222	0.214286	0.206897	0.121212	0.0645161	0.15625	0.138889	0.151515	0.233333	0.153846	0.0638298	0.0851064	0.102564	0.0909091	0.0540541	0.075	0.1	0.0666667	0.0909091	0.0810811	0.151515	0.105263	0.138889	0.2	0.184211	0.131579	0.157895	0.128205	0.322581	0.346154	0.307692	0.35
SM_C2	0.210526	0.128205	0.162791	0.166667	0.166667	0.153846	0.15	0.2	0.15	0.0869565	0.113636	0.08	0.108108	0.131579	0.111111	0.146341	0.171429	0.222222	0.259259	0.25	0.193548	0.1	0.233333	0.138889	0.225806	0.275862	0.216216	0.111111	0.0851064	0.131579	0.0666667	0.0540541	0.075	0.0731707	0.0909091	0.0666667	0.111111	0.1875	0.166667	0.171429	0.235294	0.184211	0.131579	0.189189	0.128205	0.322581	0.4	0.36	0.35
SM_C3	0.222222	0.152174	0.18	0.186047	0.186047	0.148936	0.170213	0.186047	0.170213	0.113208	0.137255	0.0862069	0.162791	0.155556	0.139535	0.191489	0.190476	0.261905	0.30303	0.257143	0.179487	0.105263	0.210526	0.136364	0.236842	0.210526	0.2	0.113208	0.0909091	0.130435	0.0961538	0.0434783	0.0833333	0.0816327	0.0754717	0.0754717	0.113636	0.175	0.186047	0.162791	0.243902	0.2	0.155556	0.204545	0.152174	0.428571	0.333333	0.30303	0.384615
[truncated: 5 more columns]
