# Supplementary material for: Metabarcoding Is Powerful yet Still Blind: A Comparative Analysis of Morphological and Molecular Surveys of Seagrass Communities
Source: PLoS One. 2015 Feb 10;10(2):e0117562. doi: 10.1371/journal.pone.0117562 (PMC4323199; doi:10.1371/journal.pone.0117562)
Supplement: S6 Dataset — Chao1 values were generated by meadow site using Vegan in the software R, while Jaccard distances were generated by meadow, by core and by sample using the program PAST. (XLSX) [file pone.0117562.s006.xlsx]

## Sheet: S6 Dataset
S6 Dataset
COI
Alpha diversity indices
ARR = ARRADON
H = L'ARCOUEST
SM = SAINT MALO
SMG = SAINTE MARGUERITE (2011=1, 2010 = 2)
C = ILE CALLOT
RO = ROSCANVEL
Alpha diversity index chaos1 by site		Generated by Vegan (v.) in the software R
COI All	chao	chao.se	jack1	jack1.se	jack2	boot	boot.se	n
SMG1	271	373.722	23.6682	357	61.5684	386.5	312.222	31.7949
SMG2	213	372.868	36.953	303	78.2134	338.5	255.111	42.1842
ARR	60	87	11.7633	78	18.4391	78	69	9.66954
SML	387	532.604	28.1666	509	86.5255	550.833	445.481	44.3224
ROS	319	440.6	25.8141	420.333	71.579	455.167	367.556	36.4918
C	307	439.522	27.7272	411.667	74.4073	448.5	356.963	37.8188
H	360	527.13	31.8404	486.667	89.5569	532	420.296	44.9797
COI no 0.5 mesh	chao	chao.se	jack1	jack1.se	jack2	boot	boot.se	n
SMG1	216	401.362	44.2446	304	66.1513	340.167	256.852	32.2797
SMG2	179	418.041	59.1767	267.667	73.7865	305.833	219.778	37.7274
ARR	54	111.143	24.8377	74	20.1494	74	64	10.3923
SML	331	592.36	50.5186	463	94.3186	516.5	392.444	44.5507
ROS	239	381.82	33.0955	327	62.6631	360.833	280.37	30.3256
C	242	374.065	30.0269	332	64.0625	365.5	284.556	31.7121
H	282	460.299	36.1887	396	82.5914	439.333	335.704	41.0824
COI
Jaccard Distances - Beta diversity		Generated by PAST(Hammer et al. 2001)
by meadow
	SMG	ARR	SM	RO	C	H
SMG	1	0.0380313	0.202128	0.140379	0.185	0.234249
ARR	0.0380313	1	0.0350467	0.0533708	0.0491329	0.0531646
SM	0.202128	0.0350467	1	0.229422	0.232143	0.35337
RO	0.140379	0.0533708	0.229422	1	0.364035	0.240809
C	0.185	0.0491329	0.232143	0.364035	1	0.262857
H	0.234249	0.0531646	0.35337	0.240809	0.262857	1
by mesh
	2mm	1mm	0.5mm
2mm	1	0.486047	0.426744
1mm	0.486047	1	0.572319
0.5mm	0.426744	0.572319	1
by sample
	SMG_F	SMG_H	ARR_J	SM12	SM16	SM14	RO3	RO13	RO9	SM6	RO7	SM3	RO14	SMG6	ARR_I	C7	RO17	SM8	RO16	RO15	SM5	H9	H16	RO1	ARR_B	H6	H14	SMG_N	H8	SMG_L	SMG18	SMG2	SMG17	SM18	H11	SMG8	RO11	H1	H5	H4	SM15	SMG9	H10	H17	SMG5	C9	RO12	C18	ARR_A
SMG_F	1	0.314815	0.0196078	0.0693069	0.045977	0.0421053	0.0104167	0.0126582	0.015873	0.00980392	0.0149254	0.0752688	0.0113636	0.0833333	0.0217391	0.0126582	0.0113636	0.038961	0.0104167	0.0128205	0.0254237	0.0361446	0.0136986	0.0136986	0.0612245	0.0365854	0.037037	0.169811	0.0208333	0.192308	0.102564	0.0909091	0.0806452	0.0512821	0.015625	0.0806452	0.0333333	0.0215054	0.0705882	0.0337079	0.03125	0.121212	0.025974	0.0133333	0.126761	0.0142857	0.0111111	0.0133333	0.0208333
SMG_H	0.314815	1	0.031746	0.0803571	0.0612245	0.037037	0.0280374	0.021978	0.0266667	0.0265487	0.0253165	0.0970874	0.02	0.106383	0.0344828	0.0449438	0.02	0.021978	0.0280374	0.0222222	0.0307692	0.076087	0.0235294	0.0357143	0.0833333	0.0537634	0.0543478	0.102941	0.0471698	0.25	0.137931	0.0897436	0.0810811	0.043956	0.04	0.0666667	0.0273973	0.0188679	0.106383	0.0294118	0.0394737	0.12987	0.0337079	0.0348837	0.107143	0.05	0.029703	0.0348837	0.0333333
ARR_J	0.0196078	0.031746	1	0.00990099	0.0240964	0.0108696	0.0705882	0.0571429	0.0943396	0.0430108	0.0877193	0.032967	0.0779221	0.0240964	0.366667	0.0277778	0.0779221	0.0277778	0.045977	0.057971	0.036036	0.0526316	0.0625	0.0625	0.179487	0.0533333	0.0540541	0.0181818	0.0574713	0.0181818	0.038961	0.0153846	0	0.027027	0.0925926	0.0166667	0.0566038	0.0470588	0.0625	0.0617284	0.0169492	0.030303	0.057971	0.0606061	0.0277778	0.0483871	0.0759494	0.0606061	0.264706
SM12	0.0693069	0.0803571	0.00990099	1	0.247788	0.201613	0.0425532	0.015625	0.0178571	0.243902	0.0350877	0.190476	0.0451128	0.101563	0.0210526	0.031746	0.0451128	0.140351	0.0425532	0.032	0.171233	0.088	0.0598291	0.0420168	0.030303	0.08	0.072	0.0566038	0.0571429	0.046729	0.133333	0.0608696	0.147059	0.233645	0.0267857	0.0636364	0.0181818	0.0820896	0.0930233	0.0839695	0.0943396	0.0973451	0.0238095	0.0677966	0.101695	0.0168067	0.0217391	0.0769231	0.0102041
SM16	0.045977	0.0612245	0.0240964	0.247788	1	0.222222	0.0483871	0.0366972	0.0543478	0.152542	0.0412371	0.176991	0.0338983	0.0598291	0.025641	0.0865385	0.042735	0.0970874	0.0569106	0.0275229	0.140741	0.11215	0.0918367	0.0288462	0.0365854	0.0630631	0.0833333	0.0215054	0.0737705	0.0326087	0.101852	0.05	0.0638298	0.25	0.0652174	0.0752688	0.0326087	0.0578512	0.0877193	0.0775862	0.164706	0.114583	0.0666667	0.09	0.0761905	0.04	0.0333333	0.0480769	0.025
SM14	0.0421053	0.037037	0.0108696	0.201613	0.222222	1	0.0298507	0.0521739	0.039604	0.152	0.0480769	0.175	0.04	0.0909091	0.0114943	0.0614035	0.0569106	0.110092	0.037594	0.025641	0.182482	0.0672269	0.0952381	0.0176991	0.0108696	0.05	0.059322	0.0510204	0.130081	0.019802	0.0762712	0.0761905	0.0693069	0.23	0.0707071	0.08	0.03	0.0793651	0.0731707	0.0991736	0.103093	0.0952381	0.0526316	0.0833333	0.0803571	0.0275229	0.0232558	0.0353982	0.011236
RO3	0.0104167	0.0280374	0.0705882	0.0425532	0.0483871	0.0298507	1	0.122642	0.107527	0.0839695	0.103093	0.0610687	0.113043	0.0483871	0.0617284	0.0720721	0.132743	0.0625	0.123967	0.168317	0.0810811	0.0775862	0.0761905	0.141414	0.045977	0.0598291	0.0884956	0.01	0.0873016	0.020202	0.059322	0.0277778	0.0291262	0.034188	0.0721649	0.0392157	0.0860215	0.0634921	0.111111	0.0650407	0.05	0.0560748	0.0727273	0.0648148	0.0347826	0.157895	0.203704	0.127451	0.0352941
RO13	0.0126582	0.021978	0.0571429	0.015625	0.0366972	0.0521739	0.122642	1	0.178082	0.0504202	0.343284	0.042735	0.233333	0.0272727	0.0454545	0.2	0.261364	0.0408163	0.239583	0.147727	0.0671642	0.0485437	0.103448	0.230769	0.0571429	0.0490196	0.0707071	0.0120482	0.100917	0.0120482	0.0384615	0.0107527	0.0113636	0.04	0.101266	0.0229885	0.150685	0.181818	0.118812	0.106796	0.0114943	0.0322581	0.16092	0.0652174	0.02	0.107143	0.0560748	0.101124	0.0597015
RO9	0.015873	0.0266667	0.0943396	0.0178571	0.0543478	0.039604	0.107527	0.178082	1	0.0480769	0.213115	0.049505	0.130952	0.0319149	0.0816327	0.0886076	0.1875	0.0361446	0.157303	0.133333	0.0583333	0.0952381	0.0526316	0.176471	0.0943396	0.0705882	0.0843373	0.0149254	0.0833333	0.0149254	0.0574713	0.04	0.0138889	0.0232558	0.0757576	0.057971	0.172414	0.10989	0.114943	0.126437	0.0285714	0.0666667	0.0493827	0.0933333	0.0617284	0.115942	0.127907	0.0933333	0.1
SM6	0.00980392	0.0265487	0.0430108	0.243902	0.152542	0.152	0.0839695	0.0504202	0.0480769	1	0.0560748	0.208333	0.0387597	0.0708661	0.0454545	0.0330579	0.0806452	0.126126	0.0364964	0.0689655	0.22963	0.0826446	0.122642	0.0625	0.0430108	0.0743802	0.112069	0.00943396	0.0833333	0.038835	0.110169	0.0540541	0.0769231	0.123894	0.0679612	0.0275229	0.0288462	0.0606061	0.0967742	0.0378788	0.0571429	0.0720721	0.0420168	0.130841	0.0775862	0.045045	0.0542636	0.0900901	0.0444444
RO7	0.0149254	0.0253165	0.0877193	0.0350877	0.0412371	0.0480769	0.103093	0.343284	0.213115	0.0560748	1	0.0576923	0.178571	0.020202	0.0555556	0.139241	0.192771	0.0227273	0.229885	0.155844	0.0650407	0.0549451	0.0769231	0.183099	0.0689655	0.043956	0.0561798	0.0140845	0.0588235	0.0140845	0.0434783	0.0379747	0.0131579	0.0337079	0.119403	0.0131579	0.16129	0.179775	0.10989	0.120879	0.027027	0.0243902	0.126582	0.0617284	0.0344828	0.140845	0.0860215	0.116883	0.0727273
SM3	0.0752688	0.0970874	0.032967	0.190476	0.176991	0.175	0.0610687	0.042735	0.049505	0.208333	0.0576923	1	0.0737705	0.0813008	0.0229885	0.0701754	0.0564516	0.0892857	0.0373134	0.0521739	0.164286	0.122807	0.126214	0.045045	0.0561798	0.165138	0.145455	0.0196078	0.09375	0.0947368	0.0756303	0.0555556	0.0480769	0.24	0.103093	0.0480769	0.029703	0.0787402	0.136752	0.0983607	0.08	0.115385	0.0707965	0.113208	0.0701754	0.0366972	0.0390625	0.0442478	0.0340909
RO14	0.0113636	0.02	0.0779221	0.0451128	0.0338983	0.04	0.113043	0.233333	0.130952	0.0387597	0.178571	0.0737705	1	0.0338983	0.0540541	0.15625	0.25	0.0471698	0.207547	0.157895	0.0780142	0.0934579	0.0824742	0.179775	0.0375	0.115385	0.0952381	0.0108696	0.112069	0.0108696	0.0446429	0.00980392	0.0208333	0.0366972	0.0786517	0.0208333	0.177215	0.105263	0.079646	0.0789474	0.0319149	0.0606061	0.0891089	0.0490196	0.0373832	0.0736842	0.0892857	0.103093	0.0666667
SMG6	0.0833333	0.106383	0.0240964	0.101563	0.0598291	0.0909091	0.0483871	0.0272727	0.0319149	0.0708661	0.020202	0.0813008	0.0338983	1	0.025641	0.0366972	0.0338983	0.0970874	0.031746	0.037037	0.084507	0.11215	0.07	0.038835	0.0493827	0.0825688	0.0540541	0.117647	0.0564516	0.0795455	0.19	0.141304	0.149425	0.0849057	0.0652174	0.111111	0.0215054	0.0491803	0.0877193	0.0416667	0.0206186	0.258824	0.0566038	0.09	0.202128	0.0612245	0.0420168	0.0283019	0.0123457
ARR_I	0.0217391	0.0344828	0.366667	0.0210526	0.025641	0.0114943	0.0617284	0.0454545	0.0816327	0.0454545	0.0555556	0.0229885	0.0540541	0.025641	1	0.0298507	0.04	0.0147059	0.0487805	0.0461538	0.0377358	0.056338	0.05	0.0677966	0.205882	0.0724638	0.0428571	0.02	0.0481928	0.02	0.0273973	0	0	0.0289855	0.0588235	0	0.0851064	0.037037	0.038961	0.0384615	0	0.016129	0.030303	0.0483871	0.0147059	0.0344828	0.0810811	0.0833333	0.266667
C7	0.0126582	0.0449438	0.0277778	0.031746	0.0865385	0.0614035	0.0720721	0.2	0.0886076	0.0330579	0.139241	0.0701754	0.15625	0.0366972	0.0298507	1	0.15625	0.030303	0.122642	0.0860215	0.0437956	0.0285714	0.0666667	0.103448	0.0277778	0.07	0.0291262	0.0120482	0.0810811	0.0243902	0.0588235	0.0107527	0	0.0505051	0.0740741	0.0113636	0.0909091	0.0934579	0.0865385	0.0857143	0.060241	0.0322581	0.0978261	0.0652174	0.0408163	0.148148	0.0560748	0.113636	0.0289855
RO17	0.0113636	0.02	0.0779221	0.0451128	0.042735	0.0569106	0.132743	0.261364	0.1875	0.0806452	0.192771	0.0564516	0.25	0.0338983	0.04	0.15625	1	0.0990099	0.254902	0.122449	0.0704225	0.0934579	0.117021	0.206897	0.0641026	0.0740741	0.138614	0.0108696	0.151786	0.0108696	0.0636364	0.040404	0.0769231	0.0272727	0.129412	0.0652174	0.177215	0.135135	0.150943	0.0982143	0.0319149	0.0824742	0.145833	0.0918367	0.0571429	0.120879	0.0892857	0.114583	0.0526316
SM8	0.038961	0.021978	0.0277778	0.140351	0.0970874	0.110092	0.0625	0.0408163	0.0361446	0.126126	0.0227273	0.0892857	0.0471698	0.0970874	0.0147059	0.030303	0.0990099	1	0.0347826	0.0744681	0.162602	0.0693069	0.142857	0.0434783	0.0277778	0.0490196	0.104167	0.037037	0.100917	0.0120482	0.0693069	0.0681818	0.0722892	0.106383	0.0875	0.0853659	0.037037	0.0353982	0.0560748	0.0363636	0.142857	0.103448	0.0520833	0.0425532	0.0967742	0.0689655	0.0366972	0.0208333	0.0142857
RO16	0.0104167	0.0280374	0.045977	0.0425532	0.0569106	0.037594	0.123967	0.239583	0.157303	0.0364964	0.229885	0.0373134	0.207547	0.031746	0.0487805	0.122642	0.254902	0.0347826	1	0.102804	0.0457516	0.0504202	0.0970874	0.215054	0.0340909	0.0508475	0.0603448	0.01	0.0787402	0.01	0.059322	0.0373832	0.0291262	0.0254237	0.106383	0.049505	0.188235	0.145299	0.111111	0.119658	0.05	0.0865385	0.145631	0.0648148	0.0625	0.1	0.111111	0.116505	0.0352941
RO15	0.0128205	0.0222222	0.057971	0.032	0.0275229	0.025641	0.168317	0.147727	0.133333	0.0689655	0.155844	0.0521739	0.157895	0.037037	0.0461538	0.0860215	0.122449	0.0744681	0.102804	1	0.0676692	0.0594059	0.0674157	0.117647	0.057971	0.0816327	0.0824742	0.0121951	0.0625	0.0246914	0.0190476	0.0108696	0.0232558	0.00980392	0.0886076	0.0114943	0.152778	0.0642202	0.108911	0.0660377	0.0235294	0.0326087	0.0869565	0.0430108	0.020202	0.108434	0.154639	0.0898876	0.0447761
SM5	0.0254237	0.0307692	0.036036	0.171233	0.140741	0.182482	0.0810811	0.0671642	0.0583333	0.22963	0.0650407	0.164286	0.0780142	0.084507	0.0377358	0.0437956	0.0704225	0.162602	0.0457516	0.0676692	1	0.0875912	0.161017	0.0620155	0.0454545	0.104478	0.0970149	0.0162602	0.133803	0.0245902	0.0719424	0.0546875	0.0655738	0.124031	0.0756303	0.0655738	0.0504202	0.0821918	0.0769231	0.0839161	0.0403226	0.0787402	0.0518519	0.0944882	0.0514706	0.0387597	0.0769231	0.0775194	0.0275229
H9	0.0361446	0.076087	0.0526316	0.088	0.11215	0.0672269	0.0775862	0.0485437	0.0952381	0.0826446	0.0549451	0.122807	0.0934579	0.11215	0.056338	0.0285714	0.0934579	0.0693069	0.0504202	0.0594059	0.0875912	1	0.108696	0.108696	0.126761	0.189474	0.204301	0.0227273	0.166667	0.0465116	0.0961538	0.0416667	0.0674157	0.0576923	0.177215	0.0215054	0.0588235	0.0789474	0.178218	0.111111	0.0444444	0.0736842	0.0918367	0.181818	0.0588235	0.076087	0.0625	0.0721649	0.0694444
H16	0.0136986	0.0235294	0.0625	0.0598291	0.0918367	0.0952381	0.0761905	0.103448	0.0526316	0.122642	0.0769231	0.126214	0.0824742	0.07	0.05	0.0666667	0.117021	0.142857	0.0970874	0.0674157	0.161017	0.108696	1	0.139241	0.0793651	0.10989	0.136364	0.0263158	0.175258	0.0263158	0.0625	0.047619	0.0375	0.0769231	0.157143	0.0779221	0.0833333	0.0990099	0.150538	0.08	0.0379747	0.0843373	0.117647	0.194805	0.0666667	0.0481928	0.0918367	0.0454545	0.0655738
RO1	0.0136986	0.0357143	0.0625	0.0420168	0.0288462	0.0176991	0.141414	0.230769	0.176471	0.0625	0.183099	0.045045	0.179775	0.038835	0.0677966	0.103448	0.206897	0.0434783	0.215054	0.117647	0.0620155	0.108696	0.139241	1	0.0625	0.0744681	0.0869565	0.012987	0.0857143	0.012987	0.0408163	0.0352941	0.0121951	0.0425532	0.0945946	0.0246914	0.181818	0.11	0.114583	0.08	0	0.0465116	0.104651	0.0823529	0.0322581	0.0740741	0.114583	0.0823529	0.0483871
ARR_B	0.0612245	0.0833333	0.179487	0.030303	0.0365854	0.0108696	0.045977	0.0571429	0.0943396	0.0430108	0.0689655	0.0561798	0.0375	0.0493827	0.205882	0.0277778	0.0641026	0.0277778	0.0340909	0.057971	0.0454545	0.126761	0.0793651	0.0625	1	0.0972222	0.0985915	0.0181818	0.0574713	0.0566038	0.038961	0	0.0338983	0.0133333	0.113208	0.0166667	0.0769231	0.0595238	0.133333	0.075	0	0.030303	0.0428571	0.0769231	0.0136986	0.101695	0.0493827	0.0769231	0.194444
H6	0.0365854	0.0537634	0.0533333	0.08	0.0630631	0.05	0.0598291	0.0490196	0.0705882	0.0743802	0.043956	0.165138	0.115385	0.0825688	0.0724638	0.07	0.0740741	0.0490196	0.0508475	0.0816327	0.104478	0.189474	0.10989	0.0744681	0.0972222	1	0.193548	0.0229885	0.136364	0.0470588	0.0660377	0.03125	0.0107527	0.123711	0.108434	0	0.0595238	0.0892857	0.191919	0.101852	0.0333333	0.0860215	0.0707071	0.131868	0.0288462	0.0888889	0.0925926	0.0842105	0.0555556
H14	0.037037	0.0543478	0.0540541	0.072	0.0833333	0.059322	0.0884956	0.0707071	0.0843373	0.112069	0.0561798	0.145455	0.0952381	0.0540541	0.0428571	0.0291262	0.138614	0.104167	0.0603448	0.0824742	0.0970149	0.204301	0.136364	0.0869565	0.0985915	0.193548	1	0.0232558	0.203883	0.047619	0.0873786	0.0425532	0.0333333	0.0588235	0.151899	0.0333333	0.060241	0.0803571	0.147059	0.102804	0.0222222	0.0989011	0.105263	0.133333	0.0392157	0.0777778	0.0733945	0.0625	0.056338
SMG_N	0.169811	0.102941	0.0181818	0.0566038	0.0215054	0.0510204	0.01	0.0120482	0.0149254	0.00943396	0.0140845	0.0196078	0.0108696	0.117647	0.02	0.0120482	0.0108696	0.037037	0.01	0.0121951	0.0162602	0.0227273	0.0263158	0.012987	0.0181818	0.0229885	0.0232558	1	0.030303	0.0645161	0.0843373	0.0857143	0.0441176	0.0361446	0.0298507	0.0597015	0.03125	0.0102041	0.0326087	0.0212766	0	0.114286	0.0121951	0.038961	0.105263	0.0135135	0.0106383	0.0126582	0.0192308
H8	0.0208333	0.0471698	0.0574713	0.0571429	0.0737705	0.130081	0.0873016	0.100917	0.0833333	0.0833333	0.0588235	0.09375	0.112069	0.0564516	0.0481928	0.0810811	0.151786	0.100917	0.0787402	0.0625	0.133803	0.166667	0.175258	0.0857143	0.0574713	0.136364	0.203883	0.030303	1	0.00990099	0.0327869	0.046729	0.0288462	0.0892857	0.193182	0.0808081	0.0851064	0.153846	0.18018	0.128205	0.0291262	0.0654206	0.133333	0.183673	0.0619469	0.0882353	0.0916667	0.0740741	0.0348837
SMG_L	0.192308	0.25	0.0181818	0.046729	0.0326087	0.019802	0.020202	0.0120482	0.0149254	0.038835	0.0140845	0.0947368	0.0108696	0.0795455	0.02	0.0243902	0.0108696	0.0120482	0.01	0.0246914	0.0245902	0.0465116	0.0263158	0.012987	0.0566038	0.0470588	0.047619	0.0645161	0.00990099	1	0.125	0.101449	0.109375	0.0238095	0.0298507	0.0757576	0.0153846	0.0206186	0.0674157	0.0322581	0	0.130435	0.0246914	0.038961	0.0769231	0.0273973	0.0106383	0.025641	0.0192308
SMG18	0.102564	0.137931	0.038961	0.133333	0.101852	0.0762712	0.059322	0.0384615	0.0574713	0.110169	0.0434783	0.0756303	0.0446429	0.19	0.0273973	0.0588235	0.0636364	0.0693069	0.059322	0.0190476	0.0719424	0.0961538	0.0625	0.0408163	0.038961	0.0660377	0.0873786	0.0843373	0.0327869	0.125	1	0.149425	0.233766	0.0576923	0.0449438	0.130952	0.0227273	0.0512821	0.101852	0.0619469	0.0444444	0.214286	0.0490196	0.0833333	0.213483	0.0531915	0.0438596	0.106383	0.0266667
SMG2	0.0909091	0.0897436	0.0153846	0.0608696	0.05	0.0761905	0.0277778	0.0107527	0.04	0.0540541	0.0379747	0.0555556	0.00980392	0.141304	0	0.0107527	0.040404	0.0681818	0.0373832	0.0108696	0.0546875	0.0416667	0.047619	0.0352941	0	0.03125	0.0425532	0.0857143	0.046729	0.101449	0.149425	1	0.191176	0.0549451	0.0533333	0.246154	0.0133333	0.0582524	0.05	0.06	0.038961	0.173333	0.0689655	0.0843373	0.27027	0.0119048	0.00961538	0.0227273	0
SMG17	0.0806452	0.0810811	0	0.147059	0.0638298	0.0693069	0.0291262	0.0113636	0.0138889	0.0769231	0.0131579	0.0480769	0.0208333	0.149425	0	0	0.0769231	0.0722892	0.0291262	0.0232558	0.0655738	0.0674157	0.0375	0.0121951	0.0338983	0.0107527	0.0333333	0.0441176	0.0288462	0.109375	0.233766	0.191176	1	0.045977	0.0277778	0.206349	0.0142857	0.04	0.0526316	0.0306122	0.0273973	0.152778	0.0352941	0.0493827	0.155844	0.025641	0.010101	0.0897436	0
SM18	0.0512821	0.043956	0.027027	0.233645	0.25	0.23	0.034188	0.04	0.0232558	0.123894	0.0337079	0.24	0.0366972	0.0849057	0.0289855	0.0505051	0.0272727	0.106383	0.0254237	0.00980392	0.124031	0.0576923	0.0769231	0.0425532	0.0133333	0.123711	0.0588235	0.0361446	0.0892857	0.0238095	0.0576923	0.0549451	0.045977	1	0.0595238	0.0581395	0.0238095	0.0625	0.0747664	0.0642202	0.097561	0.0888889	0.0510204	0.0638298	0.0721649	0.0215054	0.0267857	0.0309278	0.0138889
H11	0.015625	0.04	0.0925926	0.0267857	0.0652174	0.0707071	0.0721649	0.101266	0.0757576	0.0679612	0.119403	0.103093	0.0786517	0.0652174	0.0588235	0.0740741	0.129412	0.0875	0.106383	0.0886076	0.0756303	0.177215	0.157143	0.0945946	0.113208	0.108434	0.151899	0.0298507	0.193182	0.0298507	0.0449438	0.0533333	0.0277778	0.0595238	1	0.0277778	0.078125	0.186047	0.195122	0.164706	0.0138889	0.0519481	0.246377	0.169014	0.0609756	0.0684932	0.0537634	0.0506329	0.0980392
SMG8	0.0806452	0.0666667	0.0166667	0.0636364	0.0752688	0.08	0.0392157	0.0229885	0.057971	0.0275229	0.0131579	0.0480769	0.0208333	0.111111	0	0.0113636	0.0652174	0.0853659	0.049505	0.0114943	0.0655738	0.0215054	0.0779221	0.0246914	0.0166667	0	0.0333333	0.0597015	0.0808081	0.0757576	0.130952	0.246154	0.206349	0.0581395	0.0277778	1	0	0.0833333	0.0526316	0.0520833	0.0416667	0.152778	0.047619	0.0119048	0.219178	0.025641	0.0204082	0.0240964	0
RO11	0.0333333	0.0273973	0.0566038	0.0181818	0.0326087	0.03	0.0860215	0.150685	0.172414	0.0288462	0.16129	0.029703	0.177215	0.0215054	0.0851064	0.0909091	0.177215	0.037037	0.188235	0.152778	0.0504202	0.0588235	0.0833333	0.181818	0.0769231	0.0595238	0.060241	0.03125	0.0851064	0.0153846	0.0227273	0.0133333	0.0142857	0.0238095	0.078125	0	1	0.0879121	0.0795455	0.0786517	0.0294118	0.0263158	0.0641026	0.0666667	0.037037	0.0714286	0.117647	0.0666667	0.06
H1	0.0215054	0.0188679	0.0470588	0.0820896	0.0578512	0.0793651	0.0634921	0.181818	0.10989	0.0606061	0.179775	0.0787402	0.105263	0.0491803	0.037037	0.0934579	0.135135	0.0353982	0.145299	0.0642202	0.0821918	0.0789474	0.0990099	0.11	0.0595238	0.0892857	0.0803571	0.0102041	0.153846	0.0206186	0.0512821	0.0582524	0.04	0.0625	0.186047	0.0833333	0.0879121	1	0.196262	0.357895	0.00980392	0.0471698	0.303371	0.107843	0.0733945	0.0384615	0.0322581	0.0660377	0.0487805
H5	0.0705882	0.106383	0.0625	0.0930233	0.0877193	0.0731707	0.111111	0.118812	0.114943	0.0967742	0.10989	0.136752	0.079646	0.0877193	0.038961	0.0865385	0.150943	0.0560748	0.111111	0.108911	0.0769231	0.178218	0.150538	0.114583	0.133333	0.191919	0.147059	0.0326087	0.18018	0.0674157	0.101852	0.05	0.0526316	0.0747664	0.195122	0.0526316	0.0795455	0.196262	1	0.157407	0.03125	0.0808081	0.12	0.184783	0.0660377	0.106383	0.0689655	0.0792079	0.0512821
H4	0.0337079	0.0294118	0.0617284	0.0839695	0.0775862	0.0991736	0.0650407	0.106796	0.126437	0.0378788	0.120879	0.0983607	0.0789474	0.0416667	0.0384615	0.0857143	0.0982143	0.0363636	0.119658	0.0660377	0.0839161	0.111111	0.08	0.08	0.075	0.101852	0.102804	0.0212766	0.128205	0.0322581	0.0619469	0.06	0.0306122	0.0642202	0.164706	0.0520833	0.0786517	0.357895	0.157407	1	0.0204082	0.0485437	0.215054	0.170213	0.0654206	0.05	0.0683761	0.0679612	0.0506329
SM15	0.03125	0.0394737	0.0169492	0.0943396	0.164706	0.103093	0.05	0.0114943	0.0285714	0.0571429	0.027027	0.08	0.0319149	0.0206186	0	0.060241	0.0319149	0.142857	0.05	0.0235294	0.0403226	0.0444444	0.0379747	0	0	0.0333333	0.0222222	0	0.0291262	0	0.0444444	0.038961	0.0273973	0.097561	0.0138889	0.0416667	0.0294118	0.00980392	0.03125	0.0204082	1	0.0379747	0	0.037037	0.060241	0.0533333	0.03125	0.037037	0
SMG9	0.121212	0.12987	0.030303	0.0973451	0.114583	0.0952381	0.0560748	0.0322581	0.0666667	0.0720721	0.0243902	0.115385	0.0606061	0.258824	0.016129	0.0322581	0.0824742	0.103448	0.0865385	0.0326087	0.0787402	0.0736842	0.0843373	0.0465116	0.030303	0.0860215	0.0989011	0.114286	0.0654206	0.130435	0.214286	0.173333	0.152778	0.0888889	0.0519481	0.152778	0.0263158	0.0471698	0.0808081	0.0485437	0.0379747	1	0.0795455	0.0952381	0.263158	0.0357143	0.0490196	0.0454545	0.015625
H10	0.025974	0.0337079	0.057971	0.0238095	0.0666667	0.0526316	0.0727273	0.16092	0.0493827	0.0420168	0.126582	0.0707965	0.0891089	0.0566038	0.030303	0.0978261	0.145833	0.0520833	0.145631	0.0869565	0.0518519	0.0918367	0.117647	0.104651	0.0428571	0.0707071	0.105263	0.0121951	0.133333	0.0246914	0.0490196	0.0689655	0.0352941	0.0510204	0.246377	0.047619	0.0641026	0.303371	0.12	0.215054	0	0.0795455	1	0.114943	0.0744681	0.0454545	0.0275229	0.0430108	0.0294118
H17	0.0133333	0.0348837	0.0606061	0.0677966	0.09	0.0833333	0.0648148	0.0652174	0.0933333	0.130841	0.0617284	0.113208	0.0490196	0.09	0.0483871	0.0652174	0.0918367	0.0425532	0.0648148	0.0430108	0.0944882	0.181818	0.194805	0.0823529	0.0769231	0.131868	0.133333	0.038961	0.183673	0.038961	0.0833333	0.0843373	0.0493827	0.0638298	0.169014	0.0119048	0.0666667	0.107843	0.184783	0.170213	0.037037	0.0952381	0.114943	1	0.0769231	0.0470588	0.0792079	0.0681818	0.0634921
SMG5	0.126761	0.107143	0.0277778	0.101695	0.0761905	0.0803571	0.0347826	0.02	0.0617284	0.0775862	0.0344828	0.0701754	0.0373832	0.202128	0.0147059	0.0408163	0.0571429	0.0967742	0.0625	0.020202	0.0514706	0.0588235	0.0666667	0.0322581	0.0136986	0.0288462	0.0392157	0.105263	0.0619469	0.0769231	0.213483	0.27027	0.155844	0.0721649	0.0609756	0.219178	0.037037	0.0733945	0.0660377	0.0654206	0.060241	0.263158	0.0744681	0.0769231	1	0.0333333	0.0366972	0.0315789	0.0142857
C9	0.0142857	0.05	0.0483871	0.0168067	0.04	0.0275229	0.157895	0.107143	0.115942	0.045045	0.140845	0.0366972	0.0736842	0.0612245	0.0344828	0.148148	0.120879	0.0689655	0.1	0.108434	0.0387597	0.076087	0.0481928	0.0740741	0.101695	0.0888889	0.0777778	0.0135135	0.0882353	0.0273973	0.0531915	0.0119048	0.025641	0.0215054	0.0684932	0.025641	0.0714286	0.0384615	0.106383	0.05	0.0533333	0.0357143	0.0454545	0.0470588	0.0333333	1	0.142857	0.186667	0.0333333
RO12	0.0111111	0.029703	0.0759494	0.0217391	0.0333333	0.0232558	0.203704	0.0560748	0.127907	0.0542636	0.0860215	0.0390625	0.0892857	0.0420168	0.0810811	0.0560748	0.0892857	0.0366972	0.111111	0.154639	0.0769231	0.0625	0.0918367	0.114583	0.0493827	0.0925926	0.0733945	0.0106383	0.0916667	0.0106383	0.0438596	0.00961538	0.010101	0.0267857	0.0537634	0.0204082	0.117647	0.0322581	0.0689655	0.0683761	0.03125	0.0490196	0.0275229	0.0792079	0.0366972	0.142857	1	0.112245	0.0379747
C18	0.0133333	0.0348837	0.0606061	0.0769231	0.0480769	0.0353982	0.127451	0.101124	0.0933333	0.0900901	0.116883	0.0442478	0.103093	0.0283019	0.0833333	0.113636	0.114583	0.0208333	0.116505	0.0898876	0.0775194	0.0721649	0.0454545	0.0823529	0.0769231	0.0842105	0.0625	0.0126582	0.0740741	0.025641	0.106383	0.0227273	0.0897436	0.0309278	0.0506329	0.0240964	0.0666667	0.0660377	0.0792079	0.0679612	0.037037	0.0454545	0.0430108	0.0681818	0.0315789	0.186667	0.112245	1	0.046875
ARR_A	0.0208333	0.0333333	0.264706	0.0102041	0.025	0.011236	0.0352941	0.0597015	0.1	0.0444444	0.0727273	0.0340909	0.0666667	0.0123457	0.266667	0.0289855	0.0526316	0.0142857	0.0352941	0.0447761	0.0275229	0.0694444	0.0655738	0.0483871	0.194444	0.0555556	0.056338	0.0192308	0.0348837	0.0192308	0.0266667	0	0	0.0138889	0.0980392	0	0.06	0.0487805	0.0512821	0.0506329	0	0.015625	0.0294118	0.0634921	0.0142857	0.0333333	0.0379747	0.046875	1
C12	0.0136986	0.0235294	0.0625	0.0508475	0.0490196	0.0550459	0.13	0.116279	0.0810811	0.0625	0.135135	0.045045	0.129032	0.0594059	0.05	0.103448	0.117021	0.0666667	0.107843	0.130952	0.0873016	0.120879	0.0843373	0.111111	0.0793651	0.0978261	0.0869565	0.012987	0.0555556	0.0263158	0.0408163	0.0232558	0.0375	0.0315789	0.0945946	0.0121951	0.0684932	0.0471698	0.07	0.0693069	0.025	0.0344828	0.0674157	0.0574713	0.0212766	0.144737	0.103093	0.194805	0.0655738
C8	0.0294118	0.0246914	0.0322581	0.0526316	0.040404	0.0277778	0.112245	0.15	0.134328	0.0648148	0.15942	0.046729	0.16092	0.040404	0.0535714	0.121951	0.147727	0.0697674	0.123711	0.123457	0.064	0.0769231	0.0886076	0.131579	0.0491803	0.0659341	0.0786517	0.0277778	0.1	0.0136986	0.0888889	0.0243902	0.0821918	0.0217391	0.0694444	0.0533333	0.0882353	0.07	0.0729167	0.0833333	0.0263158	0.0487805	0.0833333	0.047619	0.0574713	0.185714	0.0729167	0.173333	0.0338983
SM10	0.0273973	0.0352941	0.0454545	0.213592	0.186813	0.183673	0.0754717	0.0430108	0.0519481	0.176471	0.0493827	0.17	0.0816327	0.0485437	0.0322581	0.0319149	0.0816327	0.168675	0.0458716	0.0666667	0.189655	0.0957447	0.109756	0.0340909	0.0454545	0.0625	0.134831	0.0128205	0.105769	0.025974	0.0842105	0.0722892	0.0632911	0.11236	0.0933333	0.05	0.0394737	0.0769231	0.0693069	0.0686275	0.0921053	0.0705882	0.0786517	0.0689655	0.0777778	0.0352941	0.0693069	0.0449438	0.03125
SM17	0.049505	0.0720721	0.0416667	0.238095	0.198276	0.25641	0.0431655	0.0491803	0.046729	0.179688	0.0545455	0.193548	0.0620155	0.0944882	0.0215054	0.0578512	0.096	0.132743	0.0507246	0.0325203	0.181818	0.0983607	0.109091	0.0517241	0.0204082	0.108333	0.0819672	0.0377358	0.0977444	0.0784314	0.0894309	0.0810811	0.0747664	0.226415	0.0761905	0.0849057	0.0280374	0.1	0.0859375	0.111111	0.0654206	0.12963	0.0762712	0.117117	0.122807	0.0347826	0.0296296	0.0420168	0.0210526
SMG_G	0.266667	0.372549	0.02	0.0808081	0.0714286	0.0537634	0.0212766	0.0128205	0.016129	0.030303	0.0151515	0.076087	0.0114943	0.111111	0.0222222	0.025974	0.0114943	0.025974	0.0322581	0.012987	0.025641	0.0493827	0.028169	0.0138889	0.0625	0.0243902	0.0375	0.12963	0.0319149	0.22	0.103896	0.0757576	0.0819672	0.0384615	0.0322581	0.047619	0.0166667	0.0217391	0.0843373	0.0224719	0.015625	0.15873	0.04	0.0416667	0.0821918	0.0294118	0.0227273	0.0273973	0.0212766
H2	0.0212766	0.0166667	0.0243902	0.0315789	0.0253165	0.0348837	0.0116279	0.0294118	0.0188679	0.0108696	0.0357143	0.0227273	0.0128205	0.08	0.0277778	0.0294118	0.025974	0.0144928	0.0235294	0.0147059	0.0183486	0.027027	0.0491803	0.015873	0.0243902	0.0273973	0.0277778	0.209302	0.0114943	0	0.0410959	0	0	0.0285714	0.0576923	0	0.0196078	0.0240964	0.0384615	0.025	0	0.0491803	0.0298507	0.047619	0.0144928	0.0338983	0.0253165	0.0153846	0.0263158
SMG4	0.0869565	0.060241	0.0147059	0.059322	0.0588235	0.0642202	0.027027	0.0430108	0.0519481	0.0344828	0.0240964	0.0636364	0.049505	0.125	0.015873	0.0210526	0.049505	0.0430108	0.0555556	0.0105263	0.037594	0.040404	0.0833333	0.0340909	0.0298507	0.030303	0.0412371	0.0675676	0.0550459	0.0675676	0.131868	0.236111	0.166667	0.0645161	0.0379747	0.183099	0.025974	0.0769231	0.0384615	0.09	0	0.213333	0.0909091	0.0813953	0.2125	0.0232558	0.0285714	0.021978	0.0153846
ARR_C	0.0612245	0.0833333	0.243243	0.0408163	0.0365854	0.021978	0.0340909	0.0277778	0.0545455	0.0430108	0.0333333	0.0681818	0.0506329	0.0240964	0.28125	0.0277778	0.0375	0.0136986	0.0340909	0.0428571	0.0176991	0.0810811	0.0461538	0.030303	0.277778	0.0675676	0.0684932	0.0181818	0.0337079	0.0566038	0.038961	0	0.0166667	0.0133333	0.0727273	0.0166667	0.0566038	0.0348837	0.0759494	0.0361446	0	0.0149254	0.0428571	0.0447761	0.0277778	0.0483871	0.0240964	0.0294118	0.30303
SM1	0.028169	0.0361446	0.046875	0.108108	0.139785	0.14	0.0566038	0.0795455	0.0675676	0.156863	0.0641026	0.15	0.0612245	0.0392157	0.0689655	0.0555556	0.0833333	0.117647	0.0566038	0.0681818	0.114754	0.0860215	0.171053	0.0987654	0.0634921	0.0638298	0.0879121	0.0266667	0.107843	0.0266667	0.0412371	0.0357143	0.025	0.114943	0.0958904	0.0512821	0.0694444	0.0679612	0.0927835	0.07	0.0519481	0.0470588	0.0561798	0.109756	0.0326087	0.0238095	0.06	0.045977	0.0666667
RO8	0.0144928	0.0246914	0.0666667	0.025641	0.00980392	0.0183486	0.197802	0.0952381	0.134328	0.0550459	0.142857	0.046729	0.147727	0.03	0.0535714	0.0697674	0.134831	0.0337079	0.112245	0.181818	0.064	0.0769231	0.0617284	0.0886076	0.0847458	0.102273	0.0666667	0.0136986	0.0891089	0.0136986	0.0208333	0	0.0128205	0.0217391	0.084507	0.0128205	0.121212	0.0490196	0.0729167	0.0833333	0	0.0238095	0.0581395	0.047619	0.010989	0.169014	0.131868	0.128205	0.0517241
SM4	0.00990099	0.0176991	0.0322581	0.151515	0.106557	0.0916031	0.110236	0.0508475	0.08	0.176	0.0566038	0.152	0.064	0.0546875	0.0340909	0.0598291	0.0725806	0.148148	0.0522388	0.0695652	0.222222	0.12069	0.156863	0.0925926	0.0434783	0.121739	0.103448	0.00952381	0.154472	0.0192308	0.0483871	0.045045	0.0277778	0.115044	0.09	0.0471698	0.0392157	0.0859375	0.115702	0.0625	0.047619	0.0825688	0.0603448	0.142857	0.0877193	0.0454545	0.115702	0.0526316	0.0333333
SMG7	0.0701754	0.0571429	0.0185185	0.0990099	0.0444444	0.0625	0.0309278	0.0246914	0.0151515	0.049505	0	0.0618557	0.0222222	0.13253	0	0.0375	0.0454545	0.106667	0.0416667	0.025	0.0420168	0.0470588	0.0547945	0.0266667	0.0185185	0.0232558	0.0357143	0.0483871	0.0860215	0.0483871	0.1125	0.136364	0.111111	0.0759494	0.0625	0.129032	0	0.0315789	0.0681818	0.0555556	0.0454545	0.184615	0.0379747	0.0675676	0.169014	0.0277778	0.032967	0.0128205	0
SM7	0.0121951	0.0212766	0.0266667	0.156522	0.104762	0.0973451	0.079646	0.05	0.0470588	0.153153	0.0333333	0.126126	0.0363636	0.0740741	0.0285714	0.0606061	0.0654206	0.193182	0.0608696	0.0947368	0.168	0.0990099	0.125	0.076087	0.0405405	0.0891089	0.0686275	0.0116279	0.12844	0.0235294	0.0673077	0.0659341	0.0574713	0.0918367	0.097561	0.0454545	0.0357143	0.0810811	0.104762	0.0636364	0.0340909	0.076087	0.0721649	0.10989	0.0824742	0.0549451	0.0642202	0.0520833	0.0277778
SM11	0.011236	0.019802	0.0243902	0.147541	0.160377	0.190909	0.0238095	0.0181818	0.0434783	0.134454	0.0416667	0.157895	0.034188	0.0512821	0.0128205	0.0275229	0.0431034	0.154639	0.032	0.0373832	0.125	0.113208	0.104167	0.0392157	0.0120482	0.0540541	0.104762	0.0107527	0.0743802	0.0107527	0.0535714	0.0721649	0.0206186	0.128713	0.0659341	0.0531915	0.0107527	0.0854701	0.0603448	0.0782609	0.101124	0.0707071	0.0571429	0.08	0.0769231	0.03	0.0336134	0.0485437	0.0125
SMG1	0.0294118	0.0375	0.0491803	0.100917	0.0510204	0.0776699	0.0480769	0.010989	0.0555556	0.0550459	0.038961	0.0769231	0.0412371	0.131868	0.0350877	0.0337079	0.0520833	0.0952381	0.0480769	0.045977	0.0725806	0.0537634	0.102564	0.0238095	0.0322581	0.0210526	0.0322581	0.0277778	0.1	0.0724638	0.126437	0.272727	0.161765	0.0681818	0.0405405	0.128571	0.0422535	0.07	0.0510204	0.0721649	0.04	0.146667	0.0581395	0.1	0.210526	0.0375	0.0510204	0.0352941	0.0166667
SMG3	0.112676	0.164557	0.028169	0.141593	0.108911	0.0714286	0.0350877	0.0306122	0.0625	0.0877193	0.0229885	0.0803571	0.0280374	0.204301	0.030303	0.0306122	0.0576923	0.0744681	0.0350877	0.0204082	0.0676692	0.114583	0.0674157	0.0326087	0.028169	0.0816327	0.0714286	0.0779221	0.0818182	0.152778	0.229885	0.192308	0.157895	0.0842105	0.0617284	0.157895	0.0121951	0.0545455	0.108911	0.0660377	0.0481928	0.1875	0.0526316	0.0898876	0.202381	0.0222222	0.0566038	0.0543478	0.0144928
SM2	0.0273973	0.0352941	0.0147059	0.126126	0.102041	0.171717	0.027027	0.0430108	0.0125	0.132075	0.0365854	0.147059	0.0291262	0.0588235	0.015873	0.0319149	0.049505	0.197531	0.027027	0.0322581	0.112903	0.0618557	0.0833333	0.0581395	0.0147059	0.0515464	0.0631579	0.0128205	0.0648148	0.0128205	0.0618557	0.0229885	0.0120482	0.164706	0.0789474	0.037037	0.0128205	0.0566038	0.0485437	0.0186916	0.202899	0.0581395	0.0322581	0.0568182	0.0543478	0.0352941	0.0384615	0.0333333	0.0153846
SM13	0.0344828	0.03	0.037037	0.217391	0.182692	0.284314	0.112069	0.0566038	0.0322581	0.19469	0.0752688	0.168142	0.0707965	0.0695652	0.025974	0.0666667	0.0900901	0.204301	0.0487805	0.0776699	0.159091	0.0825688	0.191011	0.06	0.0243902	0.0833333	0.115385	0.032967	0.160714	0.0217391	0.0630631	0.0833333	0.0645161	0.128713	0.0777778	0.0531915	0.032967	0.0762712	0.0884956	0.0782609	0.126437	0.104167	0.0776699	0.0909091	0.0873786	0.0510204	0.0512821	0.0588235	0.0253165
SM9	0.0416667	0.0560748	0.0444444	0.136364	0.209091	0.128	0.0692308	0.0517241	0.049505	0.218487	0.0679612	0.163934	0.0916667	0.0725806	0.0470588	0.0892857	0.0650407	0.184466	0.0530303	0.0521739	0.156028	0.113043	0.0841121	0.0545455	0.0561798	0.0854701	0.105263	0.00970874	0.0852713	0.0505051	0.113043	0.0458716	0.0582524	0.158879	0.07	0.0283019	0.029703	0.0703125	0.108333	0.072	0.0485437	0.0943396	0.0431034	0.0925926	0.0701754	0.0761905	0.0472441	0.0825688	0.045977
SMG10	0.0483871	0.04	0	0.0952381	0.0425532	0.0927835	0.029703	0.0235294	0.0289855	0.0784314	0.0273973	0.07	0.0434783	0.152941	0.0188679	0.0235294	0.0322581	0.0740741	0.029703	0.0117647	0.0491803	0.021978	0.0657895	0.0657895	0.0172414	0.0454545	0.0340909	0.0615385	0.05	0.0615385	0.0813953	0.161765	0.15625	0.126582	0	0.15625	0.0298507	0.02	0.0425532	0.03125	0.0138889	0.140845	0.0117647	0.0506329	0.115385	0.0540541	0.0537634	0.0121951	0
SMG11	0.183333	0.150685	0.031746	0.0900901	0.0505051	0.0666667	0.0377358	0.0108696	0.0405405	0.0357143	0.0125	0.0660377	0.0408163	0.181818	0.0169492	0.0333333	0.0515464	0.0689655	0.0576923	0.0337079	0.046875	0.0645161	0.0481928	0.0357143	0.0483871	0.0537634	0.0777778	0.153846	0.0471698	0.0714286	0.151163	0.180556	0.126761	0.0555556	0.04	0.111111	0.0416667	0.0285714	0.0612245	0.05	0.0128205	0.208333	0.0454545	0.0470588	0.177215	0.05	0.029703	0.0229885	0.0163934
SMG13	0.104478	0.115385	0.0149254	0.117117	0.0808081	0.0747664	0.0366972	0.0212766	0.025641	0.0625	0.0120482	0.0740741	0.0194175	0.175824	0	0.0322581	0.0294118	0.129412	0.0462963	0.0215054	0.0873016	0.0515464	0.0588235	0.0465116	0.030303	0.01	0.0416667	0.0985915	0.0555556	0.0985915	0.172414	0.222222	0.152778	0.0769231	0.0384615	0.121622	0.0263158	0.0373832	0.07	0.08	0.0379747	0.184211	0.043956	0.0823529	0.28	0.0235294	0.0594059	0.010989	0
SMG12	0.12069	0.130435	0.0172414	0.0952381	0.0652174	0.0707071	0.029703	0.0235294	0.0289855	0.0679612	0.0416667	0.0918367	0.0212766	0.180723	0.0188679	0.0357143	0.0322581	0.0740741	0.04	0.0238095	0.0491803	0.0568182	0.0384615	0.0253165	0.0350877	0.0574713	0.0581395	0.0952381	0.05	0.169492	0.207792	0.215385	0.233333	0.0595238	0.0140845	0.174603	0.0298507	0.0408163	0.0888889	0.0531915	0.028169	0.208955	0.0238095	0.0641026	0.208333	0.04	0.0315789	0.0506329	0.0181818
H13	0.0506329	0.0666667	0.0547945	0.064	0.0740741	0.0973451	0.0517241	0.09375	0.0853659	0.0666667	0.0813953	0.106195	0.0857143	0.0740741	0.0434783	0.05	0.0654206	0.039604	0.0608696	0.029703	0.106061	0.168421	0.164706	0.0879121	0.084507	0.1	0.123711	0.0357143	0.12844	0.0609756	0.11	0.0543478	0.0697674	0.0808081	0.168831	0.0337079	0.0609756	0.142857	0.183673	0.158416	0.0224719	0.0531915	0.106383	0.188235	0.039604	0.0322581	0.0740741	0.0631579	0.0724638
SMG14	0.116667	0.0666667	0	0.0636364	0.0309278	0.0588235	0.0192308	0.0113636	0.0138889	0.0566038	0.0131579	0.0380952	0.0315789	0.0869565	0	0.0229885	0.0537634	0.0595238	0.0291262	0	0.0569106	0.0326087	0.0375	0.0375	0	0.0107527	0.021978	0.0923077	0.038835	0.0142857	0.117647	0.140845	0.151515	0.045977	0.0277778	0.0857143	0.0142857	0.029703	0.0416667	0.0412371	0.0135135	0.121622	0.0232558	0.0625	0.126582	0.0126582	0.010101	0.0365854	0
H7	0.0238095	0.037037	0.0882353	0.0333333	0.0555556	0.05	0.0512821	0.101695	0.0888889	0.047619	0.0816327	0.0625	0.0571429	0.0410959	0.103448	0.0833333	0.0882353	0.0655738	0.0649351	0.0491803	0.06	0.0597015	0.134615	0.0925926	0.0882353	0.0769231	0.078125	0.0681818	0.121622	0.0217391	0.0597015	0.0363636	0	0.0634921	0.162791	0.04	0.0930233	0.0810811	0.0857143	0.0694444	0	0.0350877	0.103448	0.0892857	0.031746	0.0769231	0.0410959	0.0517241	0.0967742
H12	0.0506329	0.0666667	0.0547945	0.108333	0.115385	0.0598291	0.0517241	0.05	0.0595238	0.0666667	0.0689655	0.146789	0.0555556	0.0642202	0.0285714	0.0606061	0.0654206	0.09375	0.0338983	0.0505051	0.106061	0.193548	0.0879121	0.0421053	0.1	0.208791	0.135417	0.0235294	0.0982143	0.0481928	0.0776699	0.0210526	0.0337079	0.126316	0.168831	0.0454545	0.0235294	0.121495	0.171717	0.103774	0.0340909	0.0645161	0.130435	0.0978261	0.039604	0.0786517	0.0642202	0.0631579	0.0277778
H18	0.0357143	0.0638298	0.08	0.113821	0.0909091	0.0940171	0.0956522	0.0283019	0.0568182	0.109244	0.0430108	0.131579	0.0925926	0.100917	0.0704225	0.0283019	0.0825688	0.0582524	0.0862069	0.08	0.102941	0.236559	0.157303	0.0842105	0.0945946	0.14	0.202128	0.0340909	0.186916	0.0340909	0.0849057	0.0520833	0.0434783	0.0673077	0.175	0.0322581	0.0581395	0.0598291	0.153846	0.1	0.0326087	0.119565	0.08	0.193182	0.0480769	0.0638298	0.100917	0.05	0.0540541
H3	0.032967	0.038835	0.047619	0.0666667	0.0762712	0.0714286	0.0813008	0.0740741	0.0638298	0.0610687	0.0833333	0.114754	0.0869565	0.0948276	0.0375	0.0841121	0.0775862	0.0545455	0.0472441	0.0747664	0.113475	0.150943	0.0679612	0.0784314	0.0352941	0.222222	0.100917	0.0208333	0.12605	0.0425532	0.042735	0.0285714	0.019802	0.0925926	0.134831	0	0.0537634	0.10084	0.133929	0.122807	0.030303	0.0377358	0.116505	0.154639	0.0265487	0.0918367	0.0854701	0.037037	0.0365854
SMG15	0.171875	0.173333	0.0298507	0.126126	0.08	0.0740741	0.0458716	0.0319149	0.0519481	0.100917	0.0365854	0.114286	0.0291262	0.186813	0.0322581	0.0430108	0.06	0.0898876	0.0458716	0.0212766	0.0615385	0.040404	0.045977	0.045977	0.0615385	0.0625	0.0744681	0.128571	0.0454545	0.144928	0.271605	0.171053	0.2	0.076087	0.025	0.135135	0.025974	0.046729	0.102041	0.0480769	0.0246914	0.28169	0.0549451	0.0813953	0.24359	0.047619	0.0285714	0.0941176	0.03125
H15	0.0125	0.0444444	0.0273973	0.0826446	0.0754717	0.0608696	0.0810811	0.040404	0.0357143	0.0769231	0.0340909	0.0695652	0.0566038	0.0654206	0.0294118	0.03	0.0566038	0.107527	0.0344828	0.0625	0.0827068	0.252874	0.114943	0.0659341	0.0869565	0.0909091	0.150538	0.0240964	0.110092	0.0119048	0.0686275	0.0326087	0.0465116	0.05	0.1	0.0227273	0.0365854	0.0442478	0.151515	0.0550459	0.0348837	0.0319149	0.0515464	0.1	0.040404	0.13253	0.0555556	0.0645161	0.0434783
SMG16	0.0714286	0.057971	0	0.0891089	0.0333333	0.0631579	0.0531915	0.025	0.0645161	0.0606061	0.0447761	0.0408163	0.045977	0.120482	0	0.0123457	0.0581395	0.0649351	0.0421053	0	0.0423729	0.060241	0.0555556	0.0704225	0	0	0.0617284	0.0666667	0.0752688	0.0666667	0.142857	0.15625	0.189655	0.0632911	0	0.131148	0.015873	0.0543478	0.0333333	0.0561798	0.030303	0.134328	0.0125	0.0540541	0.171429	0.0138889	0.0333333	0.04	0
C5	0.0273973	0.0352941	0.0298507	0.0245902	0.0285714	0.0265487	0.0961538	0.0659341	0.0657895	0.0169492	0.0759494	0.0173913	0.06	0.0588235	0.0322581	0.114943	0.06	0.0319149	0.0654206	0.0909091	0.037594	0.0842105	0.045977	0.0833333	0.078125	0.0736842	0.0978261	0.0128205	0.0747664	0.025974	0.03	0.0229885	0.0243902	0.0206186	0.0649351	0.037037	0.0394737	0.0566038	0.0485437	0.0380952	0	0.0340909	0.0786517	0.021978	0.0319149	0.157895	0.0909091	0.107143	0.03125
C14	0.0357143	0.0309278	0.0384615	0.0458015	0.0526316	0.0666667	0.0677966	0.172043	0.0941176	0.047619	0.154762	0.0487805	0.156863	0.0810811	0.0410959	0.147368	0.145631	0.0686275	0.115044	0.0909091	0.048951	0.0849057	0.0618557	0.107527	0.0519481	0.0555556	0.0761905	0.0224719	0.0854701	0.0111111	0.0550459	0.0412371	0.0434783	0.0183486	0.0681818	0.0434783	0.0833333	0.117117	0.0619469	0.0803571	0.0215054	0.0510204	0.113402	0.039604	0.0582524	0.136364	0.0434783	0.129032	0.04
C11	0.0224719	0.029703	0.0625	0.0846154	0.0689655	0.0645161	0.092437	0.153061	0.127907	0.0967742	0.134831	0.0555556	0.161905	0.0420168	0.0526316	0.153061	0.140187	0.0660377	0.140351	0.0980392	0.124088	0.0917431	0.07	0.114583	0.0625	0.0825688	0.0733945	0.0106383	0.0826446	0.0215054	0.11215	0.0606061	0.0989011	0.0454545	0.0769231	0.0309278	0.0674157	0.113043	0.0598291	0.0964912	0.03125	0.07	0.0769231	0.0582524	0.0462963	0.0947368	0.0877193	0.224719	0.0379747
C15	0.0138889	0.0361446	0.0634921	0.0423729	0.0392157	0.0363636	0.131313	0.130952	0.0821918	0.0727273	0.106667	0.0267857	0.155556	0.06	0.0689655	0.130952	0.11828	0.091954	0.12	0.119048	0.0708661	0.0978261	0.1125	0.126582	0.0806452	0.0752688	0.0645161	0.0266667	0.0865385	0.0131579	0.0631579	0.0235294	0.0512821	0.0210526	0.0666667	0.025	0.0694444	0.0576923	0.0927835	0.038835	0.0125	0.0595238	0.0217391	0.0581395	0.0326087	0.178082	0.104167	0.263889	0.0491803
C17	0.0327869	0.027027	0.0555556	0.0366972	0.0549451	0.04	0.0736842	0.148649	0.0952381	0.0384615	0.0895522	0.039604	0.105882	0.0212766	0.0612245	0.118421	0.105882	0.0365854	0.0967742	0.05	0.0413223	0.0833333	0.0821918	0.112676	0.0555556	0.0465116	0.0722892	0.046875	0.0618557	0.0151515	0.0705882	0.0405405	0.0434783	0.0235294	0.09375	0.0434783	0.046875	0.0638298	0.0909091	0.0430108	0.0142857	0.0394737	0.0769231	0.08	0.0493827	0.0704225	0.0322581	0.125	0.0588235
SMG_M	0.136364	0.157895	0.0147059	0.0416667	0.0188679	0.0357143	0.0178571	0.0104167	0.0125	0.025641	0.0119048	0.0446429	0.0192308	0.08	0.015873	0.0104167	0.00952381	0.0430108	0.0178571	0.0105263	0.0222222	0.040404	0.045977	0.0224719	0.112903	0.0408163	0.0412371	0.0972222	0.0550459	0.0675676	0.0618557	0.0470588	0.037037	0.0206186	0.025	0.037037	0.0128205	0.0181818	0.0384615	0.0186916	0	0.0963855	0.0212766	0.0333333	0.0543478	0.0352941	0.00934579	0.021978	0.0153846
SMG_P	0.0336134	0.00740741	0	0.00581395	0	0.00613497	0	0	0	0	0	0.00609756	0	0.012987	0	0	0	0.00694444	0	0	0	0	0	0	0	0	0	0.0241935	0	0.016	0.0134228	0.0148148	0.0232558	0	0	0.0232558	0	0	0	0.00641026	0	0.0145985	0	0	0.013986	0	0	0	0.00884956
SMG_E	0.0784314	0.0461538	0.0208333	0.00961538	0.0232558	0.0212766	0.0107527	0.0131579	0.0166667	0.010101	0.015625	0.0210526	0.0117647	0.0232558	0.0232558	0.0131579	0.0117647	0.0131579	0.0107527	0.0133333	0.0172414	0.0121951	0.0289855	0.0142857	0.0208333	0.0379747	0.0384615	0.0535714	0.0106383	0.0172414	0.0246914	0.0147059	0	0.025974	0.0163934	0	0.0172414	0.010989	0.0232558	0.0113636	0	0.0597015	0.0133333	0.0428571	0.0266667	0.0149254	0.0114943	0.0138889	0.0222222
SMG_O	0	0.0208333	0	0	0	0	0	0	0	0	0	0	0	0.0147059	0	0	0	0	0	0	0	0	0	0	0	0	0	0	0	0.025641	0.015873	0	0.0227273	0	0	0.0227273	0	0	0	0	0	0.0196078	0	0	0	0	0	0	0
ARR_K	0	0	0	0	0	0	0	0	0	0	0	0	0	0	0	0	0	0	0	0	0	0	0	0	0	0	0	0	0	0	0	0	0	0	0	0	0	0	0	0	0	0	0	0	0	0	0	0	0
C3	0.0135135	0.0352941	0.0454545	0.0162602	0.0285714	0.0357143	0.151515	0.0898876	0.0657895	0.025641	0.103896	0.0353982	0.0707071	0.0693069	0.0491803	0.114943	0.06	0.0543478	0.0654206	0.0666667	0.0534351	0.0957447	0.0581395	0.045977	0.0615385	0.0851064	0.0631579	0.025974	0.0454545	0.0533333	0.040404	0.0113636	0.0243902	0.0421053	0.108108	0.0120482	0.0675676	0.046729	0.0485437	0.0380952	0.0121951	0.045977	0.0549451	0.0449438	0.0210526	0.205479	0.102041	0.148148	0.047619
C16	0.0434783	0.0365854	0.047619	0.0338983	0.039604	0.0366972	0.0471698	0.146341	0.0833333	0.0353982	0.171429	0.0363636	0.0842105	0.0294118	0.0517241	0.175	0.119565	0.032967	0.14433	0.0449438	0.0546875	0.0416667	0.060241	0.128205	0.047619	0.0421053	0.0425532	0.0410959	0.0666667	0.027027	0.0526316	0.0487805	0.0384615	0.0212766	0.0821918	0.0384615	0.0857143	0.135417	0.0606061	0.104167	0	0.047619	0.120482	0.0465116	0.0681818	0.133333	0.0294118	0.125	0.05
RO10	0.0138889	0.0238095	0.0806452	0.0165289	0.0291262	0.0458716	0.0769231	0.25	0.112676	0.0442478	0.257576	0.0454545	0.195402	0.0392157	0.0508475	0.1875	0.195402	0.0215054	0.230769	0.119048	0.0542636	0.0631579	0.0987654	0.186667	0.0634921	0.0638298	0.0645161	0.0131579	0.0970874	0.0131579	0.0306122	0.0235294	0	0.0210526	0.15942	0	0.184615	0.134021	0.0927835	0.0918367	0	0.0229885	0.160494	0.0833333	0.0326087	0.0886076	0.0707071	0.0963855	0.0847458
RO18	0.0105263	0.0283019	0.0714286	0.057971	0.075	0.0148148	0.216216	0.134615	0.108696	0.0522388	0.12766	0.037594	0.133929	0.032	0.0625	0.0925926	0.245098	0.0630631	0.19469	0.17	0.0816327	0.0877193	0.0873786	0.131313	0.0588235	0.0695652	0.079646	0.010101	0.0708661	0.010101	0.0508475	0.0185185	0.039604	0.0169492	0.0510204	0.05	0.0752688	0.0555556	0.112069	0.0569106	0.04	0.0566038	0.0733945	0.0754717	0.0350877	0.159574	0.205607	0.151515	0.0357143
RO5	0.0135135	0.0232558	0.0454545	0.0504202	0.0384615	0.0357143	0.151515	0.25974	0.157143	0.0344828	0.231884	0.0446429	0.177778	0.0384615	0.0491803	0.141176	0.247059	0.0659341	0.2	0.129412	0.078125	0.0842105	0.0963855	0.246575	0.0615385	0.0736842	0.0978261	0.0128205	0.116505	0.025974	0.03	0.0348837	0.0243902	0.0102041	0.123288	0.037037	0.112676	0.142857	0.102041	0.112245	0.0246914	0.045977	0.129412	0.0568182	0.0430108	0.142857	0.125	0.0941176	0.047619
C6	0.0151515	0.0666667	0.0338983	0.0446429	0.0204082	0.0384615	0.115789	0.0470588	0.0428571	0.0275229	0.0547945	0.0186916	0.0769231	0.0752688	0.037037	0.0853659	0.0769231	0.0470588	0.049505	0.0864198	0.04	0.091954	0.0506329	0.0506329	0.0517241	0.0804598	0.0813953	0.0597015	0.0808081	0.0142857	0.0555556	0.0253165	0.0133333	0.0111111	0.0882353	0.0133333	0.0289855	0.0196078	0.0869565	0.0520833	0.0135135	0.0506329	0.0731707	0.0625	0.0348837	0.15942	0.0869565	0.118421	0.0357143
C2	0.0142857	0.0243902	0.031746	0.034188	0.0505051	0.046729	0.134021	0.120482	0.132353	0.045045	0.125	0.0272727	0.120879	0.04	0.0344828	0.134146	0.120879	0.0449438	0.1	0.0823529	0.072	0.076087	0.0481928	0.0875	0.0483871	0.0537634	0.0777778	0.0135135	0.0673077	0.0273973	0.0531915	0.0240964	0.0126582	0.0326087	0.04	0.025641	0.056338	0.0693069	0.0721649	0.0606061	0.0128205	0.0357143	0.0574713	0.0722892	0.0333333	0.150685	0.0833333	0.141026	0.0333333
RO4	0.0192308	0.03125	0.0930233	0.019802	0.0117647	0.0107527	0.135802	0.102941	0.113208	0.0425532	0.125	0.0215054	0.0769231	0.0238095	0.105263	0.056338	0.135135	0.0273973	0.108434	0.0724638	0.0265487	0.0519481	0.0615385	0.078125	0.0681818	0.0526316	0.0394737	0.0178571	0.0333333	0.0363636	0.0519481	0.0307692	0.0333333	0.0131579	0.0909091	0	0.0754717	0.0465116	0.075	0.0481928	0	0.0298507	0.0422535	0.0757576	0.0273973	0.157895	0.131579	0.109375	0.0731707
C1	0.0470588	0.030303	0.0375	0.0692308	0.0517241	0.0483871	0.0940171	0.168421	0.144578	0.0387597	0.164706	0.048	0.121495	0.0701754	0.04	0.206522	0.153846	0.0471698	0.174312	0.0679612	0.0629371	0.0733945	0.05	0.153846	0.0375	0.0545455	0.0454545	0.0333333	0.075	0.0333333	0.0934579	0.107527	0.126437	0.00892857	0.0786517	0.101124	0.0941176	0.135135	0.0608696	0.118182	0.0319149	0.0714286	0.111111	0.0490196	0.0990099	0.0967742	0.0608696	0.138298	0.025641
C13	0.0166667	0	0.0185185	0.0183486	0.0217391	0.02	0.0309278	0.121622	0.116667	0	0.145161	0.019802	0.0952381	0	0.0204082	0.152778	0.0952381	0.0246914	0.0752688	0.0123457	0.0247934	0.0229885	0.0405405	0.0547945	0	0.0114943	0.0357143	0.015625	0.0306122	0	0.0229885	0.056338	0.0294118	0	0.0461538	0.0447761	0.0483871	0.113636	0.032967	0.0795455	0.0298507	0.0131579	0.0789474	0.0128205	0.0375	0.0724638	0.0561798	0.0821918	0
RO6	0.0111111	0.04	0.0897436	0.0217391	0.0333333	0.0153846	0.25	0.13	0.114943	0.0461538	0.122222	0.064	0.173077	0.0508475	0.0666667	0.118812	0.161905	0.0761905	0.101695	0.178947	0.0694444	0.0917431	0.0490196	0.126316	0.0493827	0.0825688	0.0833333	0.0215054	0.0650407	0.0215054	0.0438596	0	0.010101	0.0176991	0.0888889	0.010101	0.0674157	0.0491803	0.0877193	0.0504202	0.03125	0.0490196	0.0566038	0.0380952	0.0272727	0.209302	0.203883	0.135417	0.0512821
C10	0.0375	0.0212766	0.0547945	0.0472441	0.045045	0.0689655	0.119266	0.166667	0.126582	0.0406504	0.207792	0.0330579	0.151515	0.045045	0.0588235	0.153846	0.163265	0.0606061	0.232323	0.0947368	0.0656934	0.0776699	0.11236	0.137931	0.0405405	0.0576923	0.0686275	0.0235294	0.0982143	0.0116279	0.0571429	0.0659341	0.0454545	0.0190476	0.0843373	0.0454545	0.144737	0.176471	0.0740741	0.103774	0.0111111	0.0645161	0.142857	0.0631579	0.0606061	0.0909091	0.0841121	0.16092	0.0422535
RO2	0.0125	0.0217391	0.056338	0.0564516	0.0458716	0.0517241	0.165049	0.131868	0.12987	0.0677966	0.213333	0.0423729	0.142857	0.027027	0.0447761	0.0618557	0.142857	0.0510204	0.176471	0.108696	0.0666667	0.0480769	0.0777778	0.114943	0.0416667	0.0384615	0.0594059	0.0119048	0.0707965	0.0119048	0.0792079	0.0555556	0.0714286	0.05	0.0864198	0.0344828	0.164384	0.0925926	0.0654206	0.0747664	0.0470588	0.0430108	0.0625	0.0531915	0.0729167	0.119048	0.117647	0.137931	0.0434783
C4	0	0	0	0.010989	0	0	0.0125	0.0666667	0.0212766	0	0.0612245	0	0.057971	0	0	0.142857	0.0428571	0	0.0384615	0.016129	0.0194175	0	0.0175439	0.0545455	0	0	0	0	0.025	0	0	0	0	0	0.0208333	0	0	0.0533333	0	0.027027	0	0	0.05	0	0	0.0377358	0	0.0714286	0
Jaccard Distances - Beta diversity
by site
by mesh
by sample
[truncated: 56 more columns]
